# Supplementary material for: Synthesis of 3,3-Disubstituted Thietane Dioxides
Source: PubMed Central journal article supplement (PMC11536365; doi:10.1021/acs.joc.4c01843), 2024-10-11
Supplement: jo4c01843_si_001.pdf [file jo4c01843_si_001.pdf]

## SUPPORTING INFORMATION

### Synthesis of 3,3-Disubstituted Thietane Dioxides

Peerawat Saejong,<sup>a</sup> Jaining Zhong,<sup>a</sup> Juan J. Rojas,<sup>a</sup> Andrew J. P. White,<sup>a</sup>  
Chulho Choi,<sup>b</sup> and James A. Bull<sup>a\*</sup>

<sup>a</sup> Department of Chemistry, Imperial College London, Molecular Sciences Research Hub, White City Campus, Wood Lane W12 0BZ, UK

<sup>b</sup> Pfizer Worldwide Research, Development and Medical, Eastern Point Rd., Groton, CT 06340, USA.

\*E-mail: j.bull@imperial.ac.uk

|                                                                                                                            |         |
|----------------------------------------------------------------------------------------------------------------------------|---------|
| Single crystal X-ray data for 3,3-disubstituted thietane dioxides <b>2a</b> , <b>3aa</b> , <b>3ac</b> and <b>5aa</b> ..... | S2-S5   |
| <sup>1</sup> H and <sup>13</sup> C NMR spectra.....                                                                        | S6-S70  |
| Thietane-3-ols.....                                                                                                        | S7-S15  |
| Thietane-3-ol-1,1-dioxides.....                                                                                            | S16-S26 |
| Friedel–Crafts of thietane dioxides.....                                                                                   | S27-S54 |
| C-S alkylation of thietane dioxides .....                                                                                  | S55-S61 |
| C-O alkylation of thietane dioxide.....                                                                                    | S62-S64 |
| Further functionalisation of 3,3-disubstituted thietane dioxide.....                                                       | S65-S70 |
| References.....                                                                                                            | S71     |

## Preparation of single crystals

**2a:** Single crystals of **2a** were grown by dissolving the compound in a solvent mixture of CH<sub>2</sub>Cl<sub>2</sub> and hexane (6:4) at 40 °C. The warm mixture (2.0 mL) was added to **2a** (3.1 mg) in a 3 mL vial, which was then capped and left at room temperature until crystals formed.

**3aa:** For the growth of single crystals of **3aa**, acetone was used to dissolve the compound in a 3 mL vial. The vial was then loosely capped and placed inside a 10 mL vial containing 1.0 mL of heptane. The larger vial was sealed and stored at –20 °C until crystal formation was observed.

**3ac** and **5aa:** Single crystals of **3ac** and **5aa** were grown slowly in CDCl<sub>3</sub> at room temperature.

## Crystal Data, Data Collection and Refinement Parameters

**Table S1.** Crystal Data, Data Collection and Refinement Parameters for the structures of **2a**, **3aa**, **3ac** and **5aa**.

| data                                                                    | <b>2a</b>                                        | <b>3aa</b>                                                     | <b>3ac</b>                                       | <b>5aa</b>                                                    |
|-------------------------------------------------------------------------|--------------------------------------------------|----------------------------------------------------------------|--------------------------------------------------|---------------------------------------------------------------|
| formula                                                                 | C <sub>10</sub> H <sub>12</sub> O <sub>4</sub> S | C <sub>17</sub> H <sub>18</sub> O <sub>4</sub> S               | C <sub>18</sub> H <sub>20</sub> O <sub>4</sub> S | C <sub>17</sub> H <sub>18</sub> O <sub>3</sub> S <sub>2</sub> |
| formula weight                                                          | 228.26                                           | 318.37                                                         | 332.40                                           | 334.43                                                        |
| colour, habit                                                           | colourless needles                               | colourless blocks                                              | colourless tablets                               | colourless tablets                                            |
| temperature / K                                                         | 173                                              | 173                                                            | 173                                              | 173                                                           |
| crystal system                                                          | monoclinic                                       | orthorhombic                                                   | monoclinic                                       | monoclinic                                                    |
| space group                                                             | <i>P</i> 2 <sub>1</sub> / <i>c</i> (no. 14)      | <i>P</i> 2 <sub>1</sub> 2 <sub>1</sub> 2 <sub>1</sub> (no. 19) | <i>P</i> 2 <sub>1</sub> / <i>c</i> (no. 14)      | <i>P</i> 2 <sub>1</sub> / <i>c</i> (no. 14)                   |
| <i>a</i> / Å                                                            | 5.6198(3)                                        | 9.1214(2)                                                      | 7.0019(2)                                        | 13.0110(3)                                                    |
| <i>b</i> / Å                                                            | 6.9237(3)                                        | 11.1350(3)                                                     | 11.1321(3)                                       | 5.89527(15)                                                   |
| <i>c</i> / Å                                                            | 25.4955(12)                                      | 15.0959(4)                                                     | 20.8963(6)                                       | 21.4203(6)                                                    |
| $\alpha$ / deg                                                          | 90                                               | 90                                                             | 90                                               | 90                                                            |
| $\beta$ / deg                                                           | 96.029(5)                                        | 90                                                             | 95.061(3)                                        | 91.614(3)                                                     |
| $\gamma$ / deg                                                          | 90                                               | 90                                                             | 90                                               | 90                                                            |
| <i>V</i> / Å <sup>3</sup>                                               | 986.54(8)                                        | 1533.24(6)                                                     | 1622.43(8)                                       | 1642.35(8)                                                    |
| <i>Z</i>                                                                | 4                                                | 4                                                              | 4                                                | 4                                                             |
| <i>D<sub>c</sub></i> / g cm <sup>-3</sup>                               | 1.537                                            | 1.379                                                          | 1.361                                            | 1.353                                                         |
| radiation used                                                          | Cu-K $\alpha$                                    | Mo-K $\alpha$                                                  | Cu-K $\alpha$                                    | Cu-K $\alpha$                                                 |
| $\mu$ / mm <sup>-1</sup>                                                | 2.876                                            | 0.227                                                          | 1.927                                            | 3.018                                                         |
| no. of unique reflns                                                    |                                                  |                                                                |                                                  |                                                               |
| measured ( <i>R</i> <sub>int</sub> )                                    | 1938 (0.0296)                                    | 3464 (0.0397)                                                  | 3130 (0.0358)                                    | 3271 (0.0395)                                                 |
| obs,   <i>F</i> <sub>o</sub>   > 4 $\sigma$ (  <i>F</i> <sub>o</sub>  ) | 1618                                             | 3161                                                           | 2360                                             | 2673                                                          |
| completeness (%) [a]                                                    | 99.9                                             | 99.9                                                           | 98.7                                             | 99.8                                                          |
| no. of variables                                                        | 142                                              | 206                                                            | 216                                              | 202                                                           |
| <i>R</i> <sub>1</sub> (obs), <i>wR</i> <sub>2</sub> (all) [b]           | 0.0363, 0.1035                                   | 0.0335, 0.0800                                                 | 0.0423, 0.1181                                   | 0.0372, 0.1027                                                |
| CCDC code                                                               | 2368330                                          | 2368331                                                        | 2368332                                          | 2368333                                                       |

[a] Completeness to 0.84 Å resolution. [b]  $R_1 = \sum ||F_o| - |F_c|| / \sum |F_o|$ ;  $wR_2 = \{\sum [w(F_o^2 - F_c^2)^2] / \sum [w(F_o^2)^2]\}^{1/2}$ ;  $w^{-1} = \sigma^2(F_o^2) + (aP)^2 + bP$ .

Table S1 provides a summary of the crystallographic data for the structures of **2a**, **3aa**, **3ac** and **5aa**. Data were collected using Agilent Xcalibur PX Ultra A (**2a**, **3ac** and **5aa**) and Agilent Xcalibur 3 E (**3aa**) diffractometers, and the structures were solved and refined using the OLEX2,<sup>1f</sup> SHELXTL<sup>2</sup> and SHELX-2013<sup>3</sup> program systems. The absolute structure of **3aa** was determined by use of the Flack parameter [ $x = 0.00(3)$ ]. CCDC 2368330 to 2368333.

### X-Ray crystallography

The O15–H hydrogen atom in the structure of **2a** was located from a  $\Delta F$  map and refined freely subject to an O–H distance constraint of 0.90 Å. Whilst the structure of **2a** can be modelled using a half volume unit cell based on halving the  $c$  axis length, this results in a significantly disordered model in a chiral space group with an indeterminate Flack parameter [ $x = 0.25(11)$ ]. The version presented here using the longer  $c$  axis, however, has no disorder in a centrosymmetric space group and is thus much preferred. The O22–H hydrogen atom in the structure of **3aa** was located from a  $\Delta F$  map and refined freely subject to an O–H distance constraint of 0.90 Å. The absolute structure of **3aa** was determined by use of the Flack parameter [ $x = 0.00(3)$ ]. The O22–H hydrogen atom in the structure of **3ac** was located from a  $\Delta F$  map and refined freely subject to an O–H distance constraint of 0.90 Å.

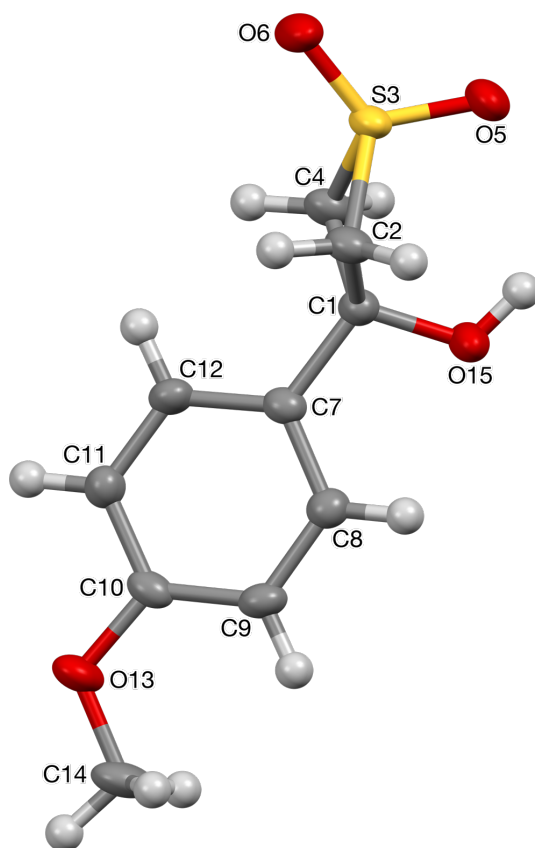

**Fig. S1** The crystal structure of **2a** (65% probability ellipsoids).

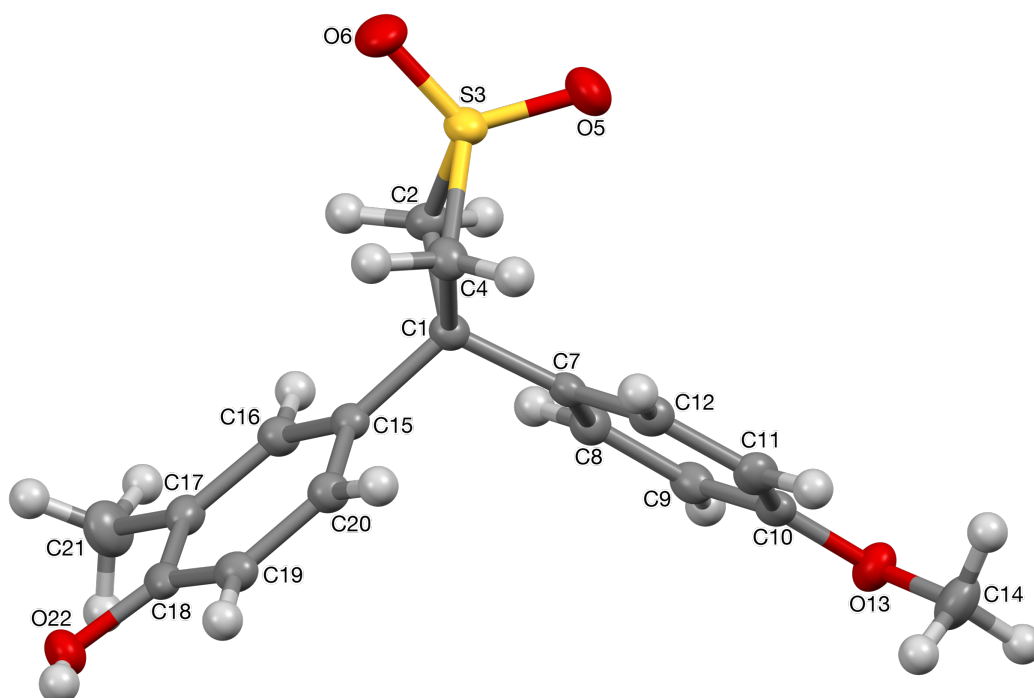

**Fig. S2** The crystal structure of **3aa** (50% probability ellipsoids).

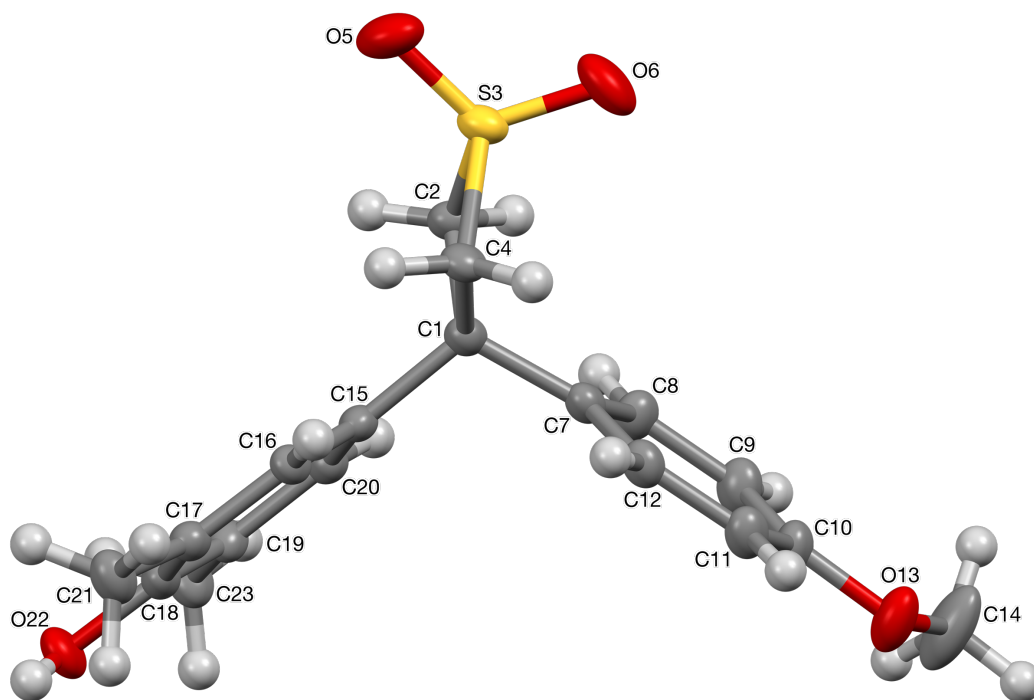

**Fig. S3** The crystal structure of **3ac** (50% probability ellipsoids).

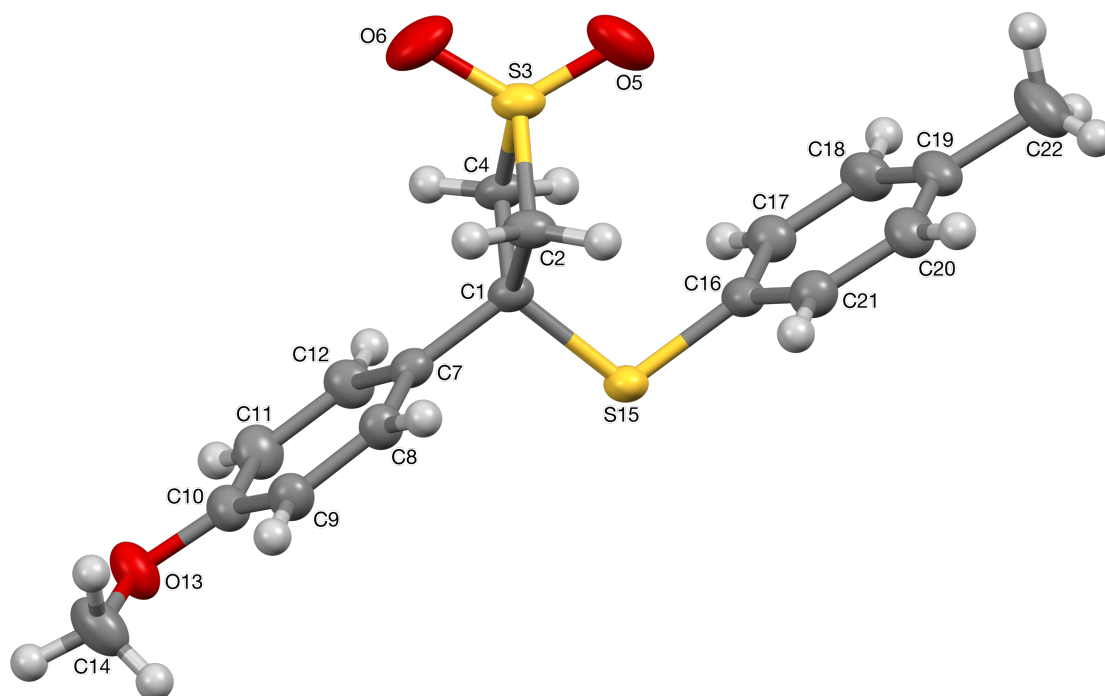

**Fig. S4** The crystal structure of **5aa** (50% probability ellipsoids).

## **$^1\text{H}$ and $^{13}\text{C}$ NMR Spectra of Selected Compounds**

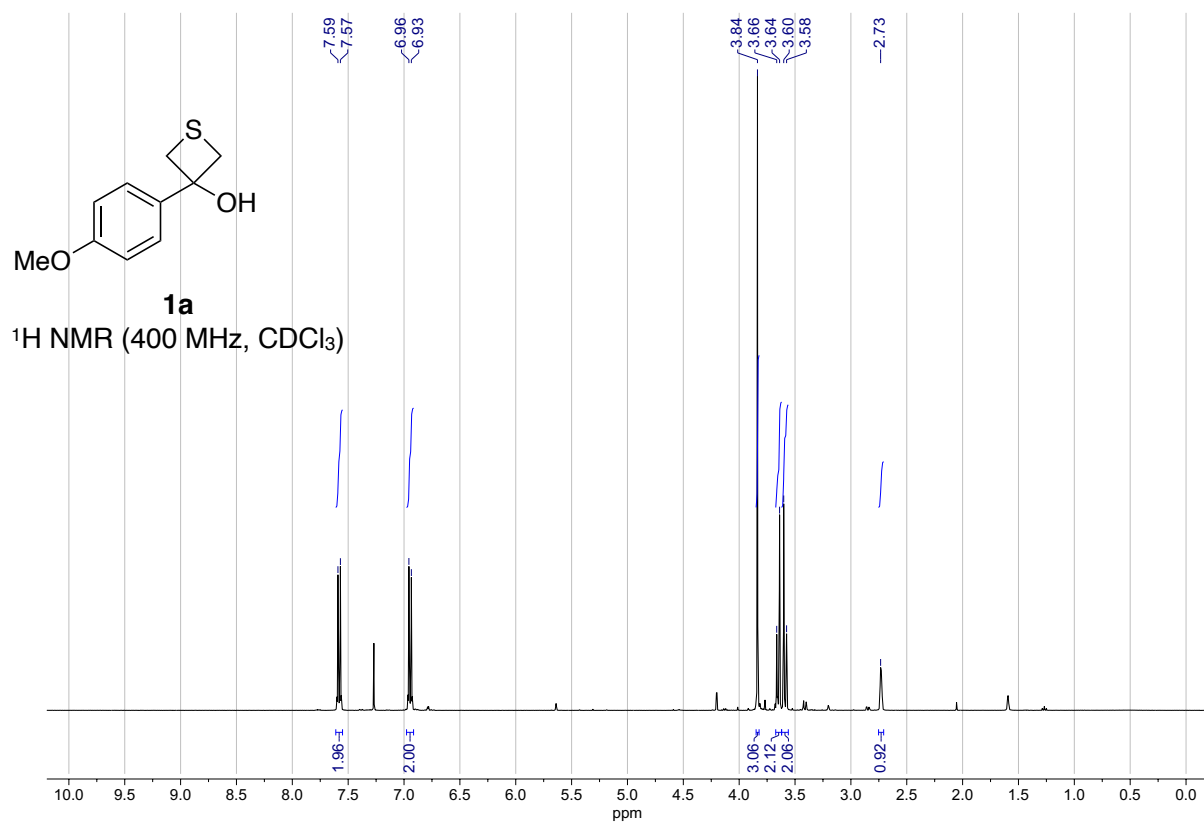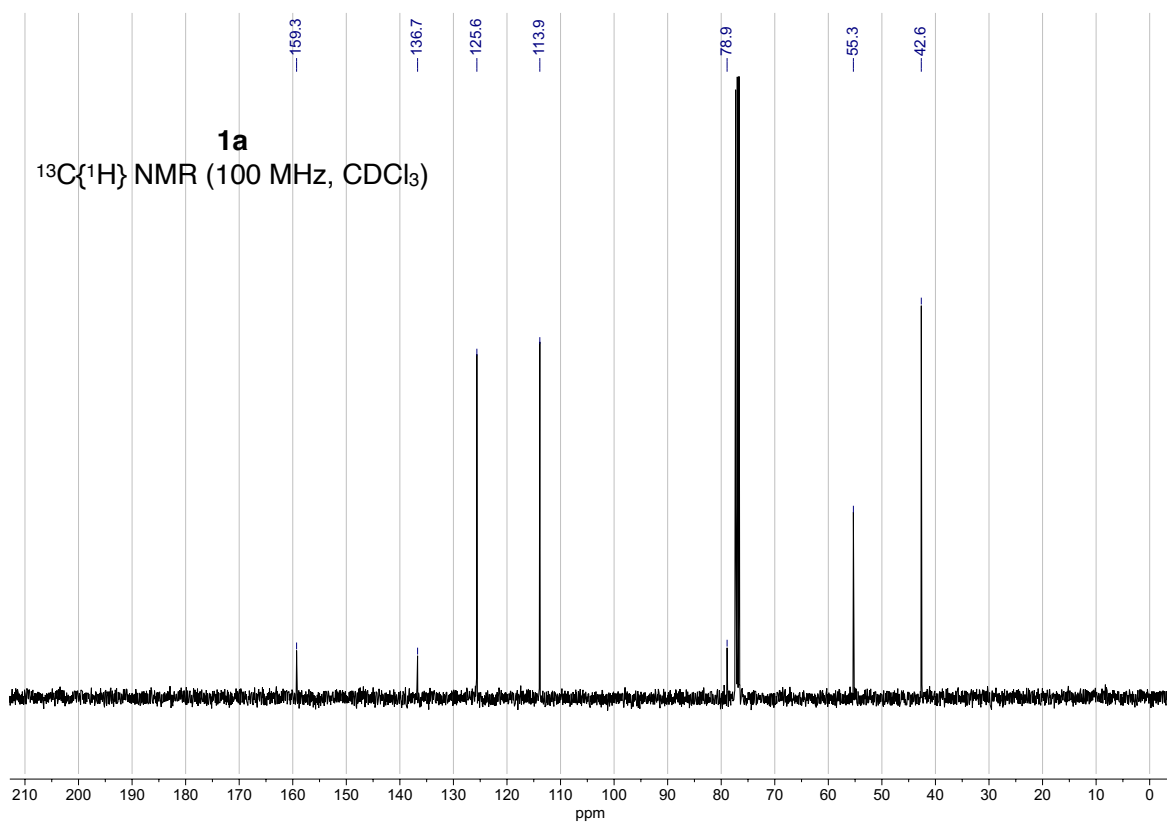

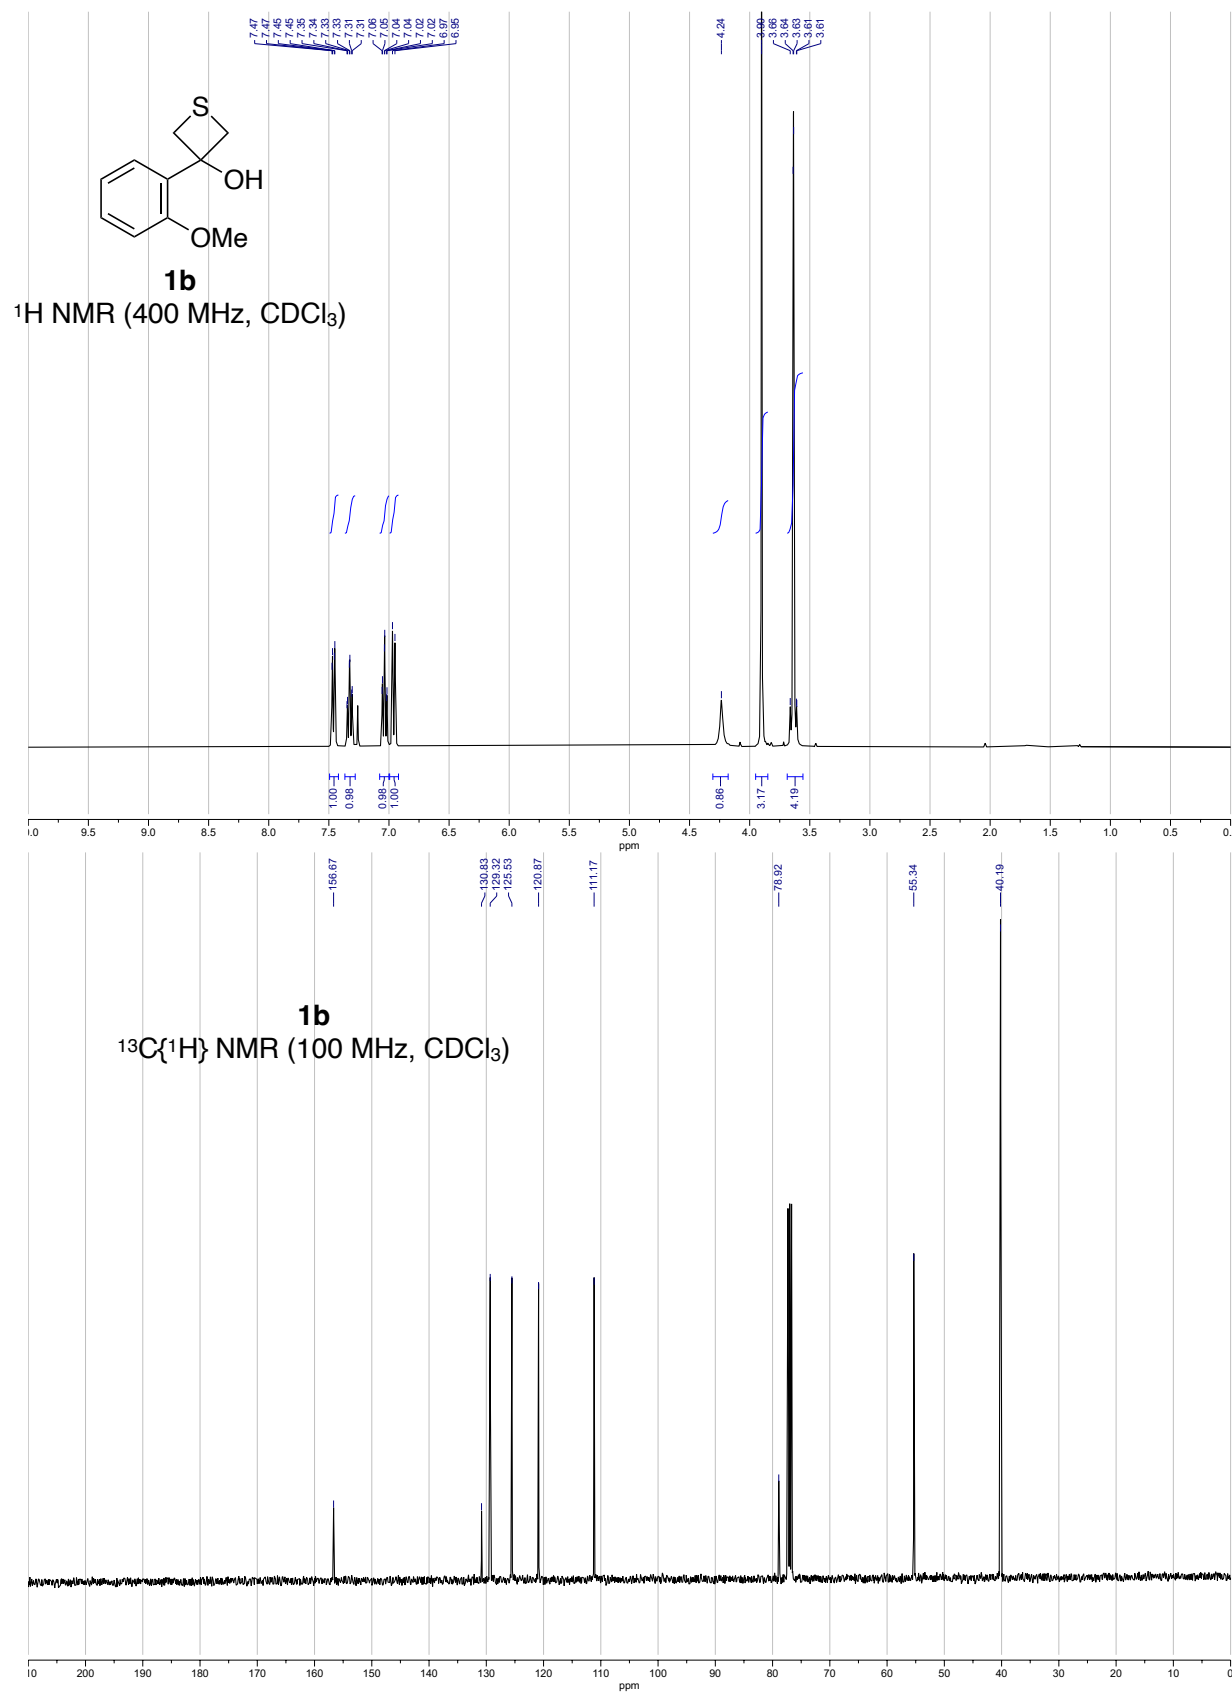



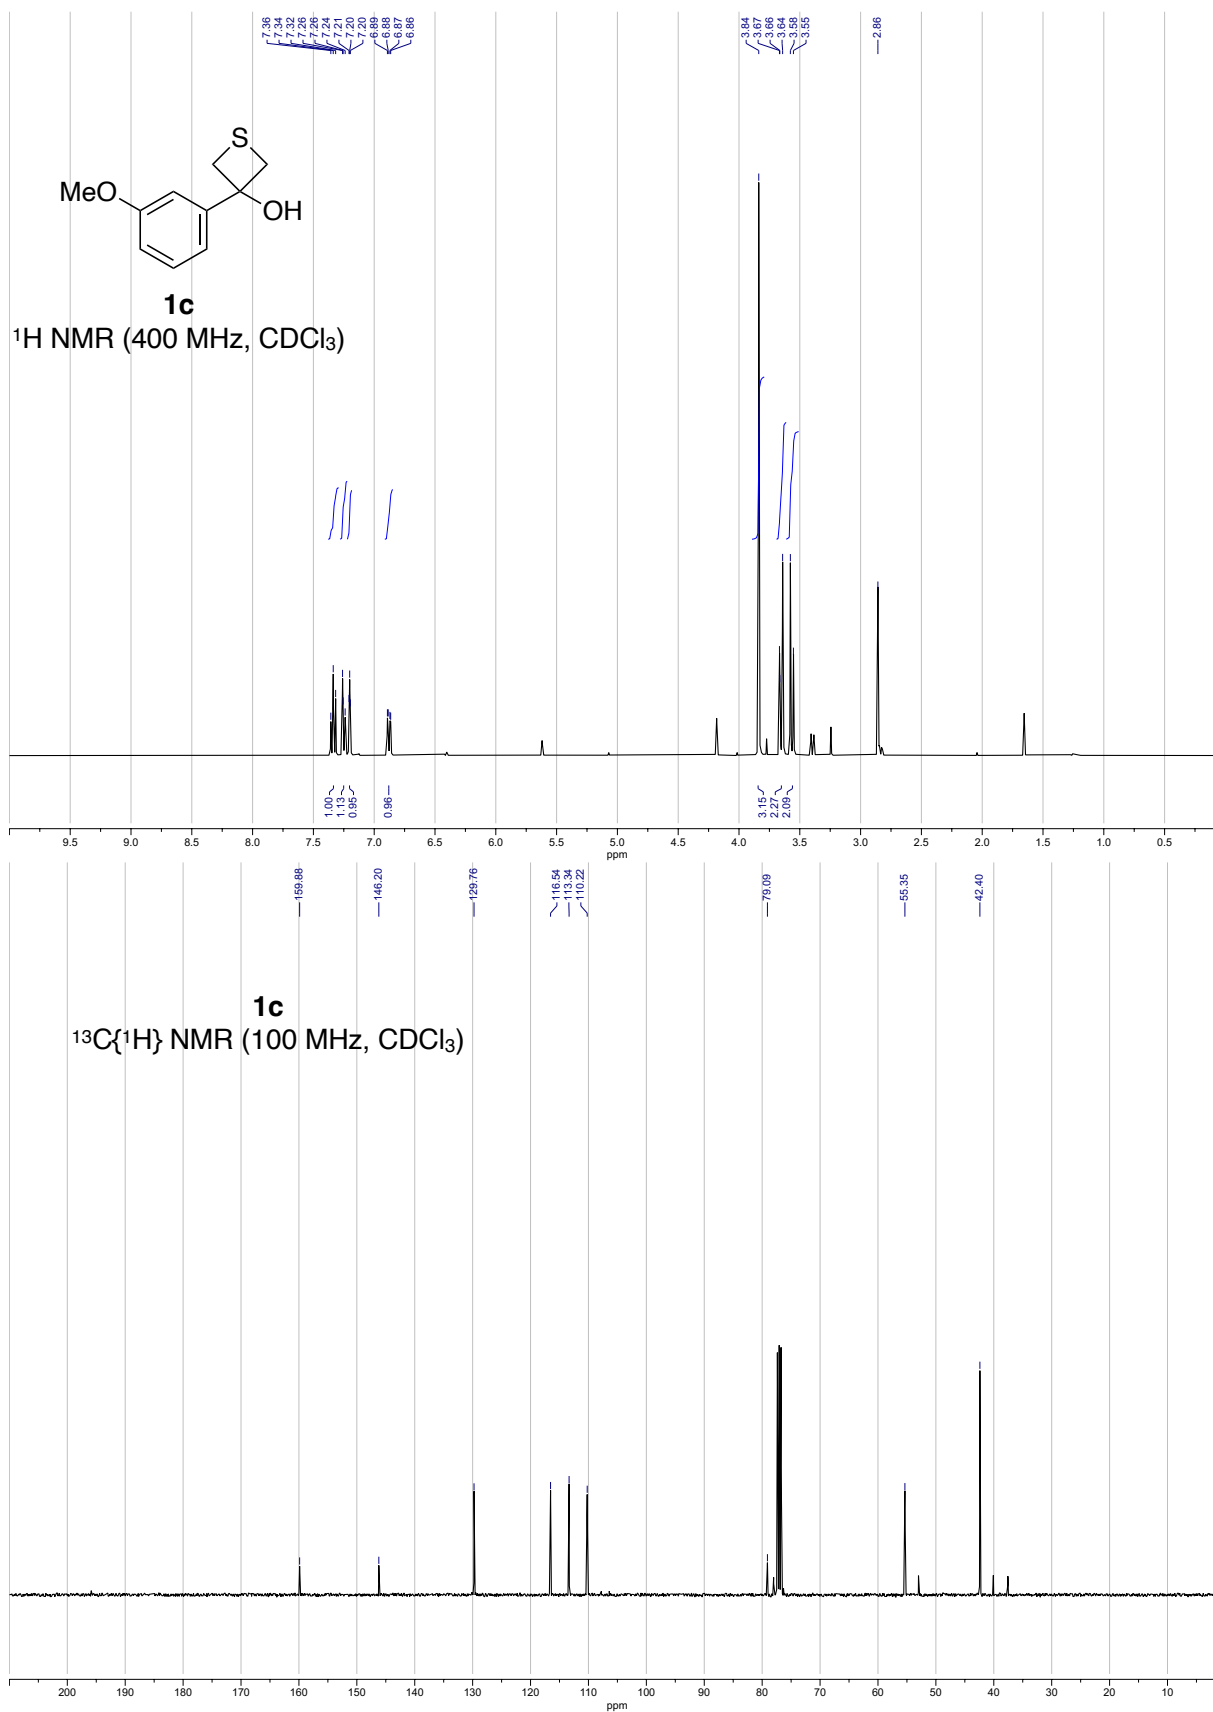

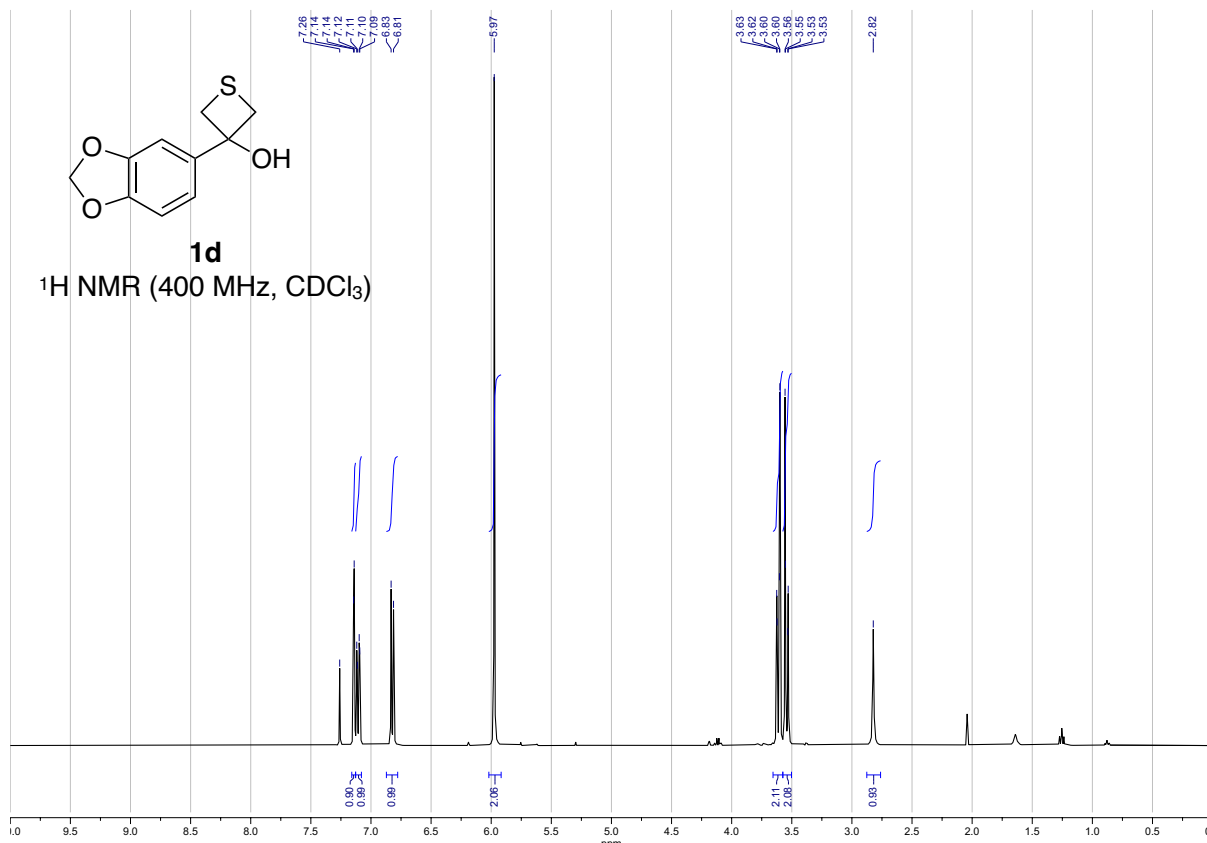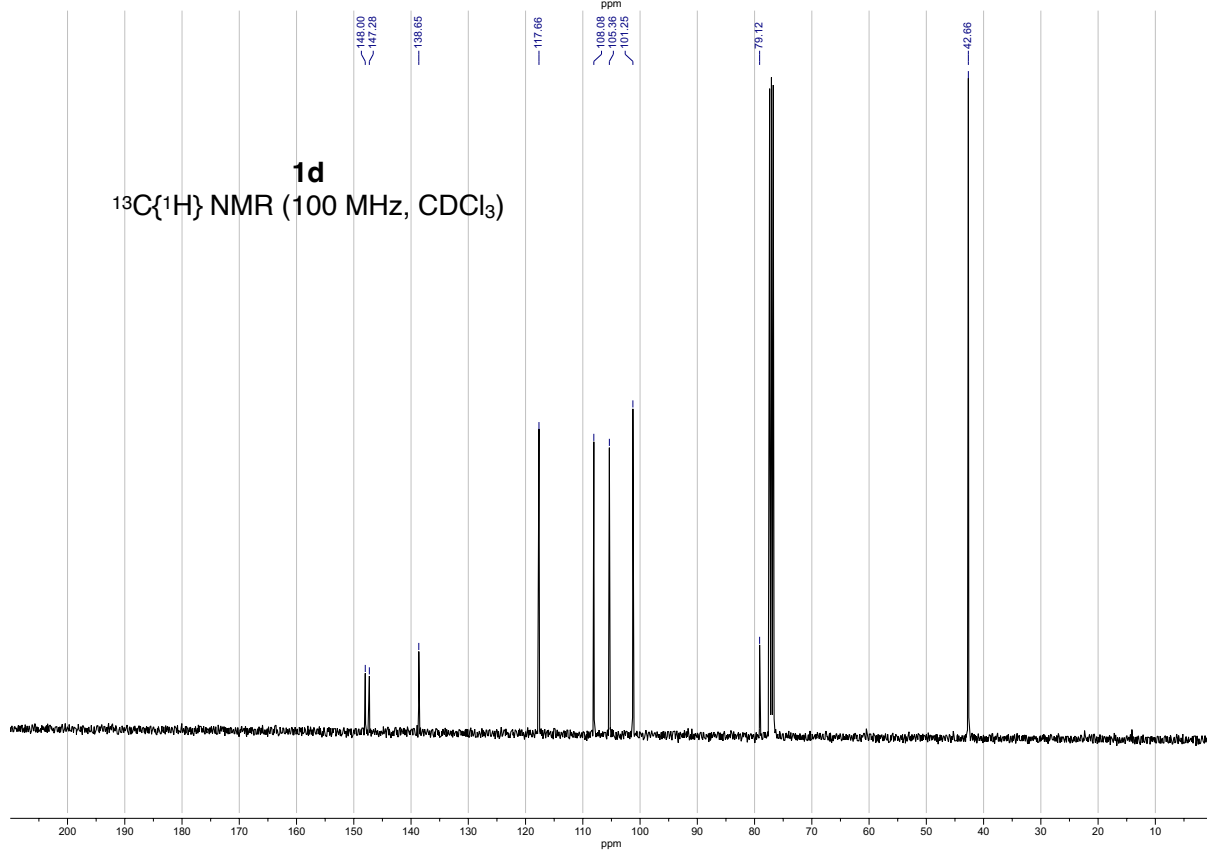

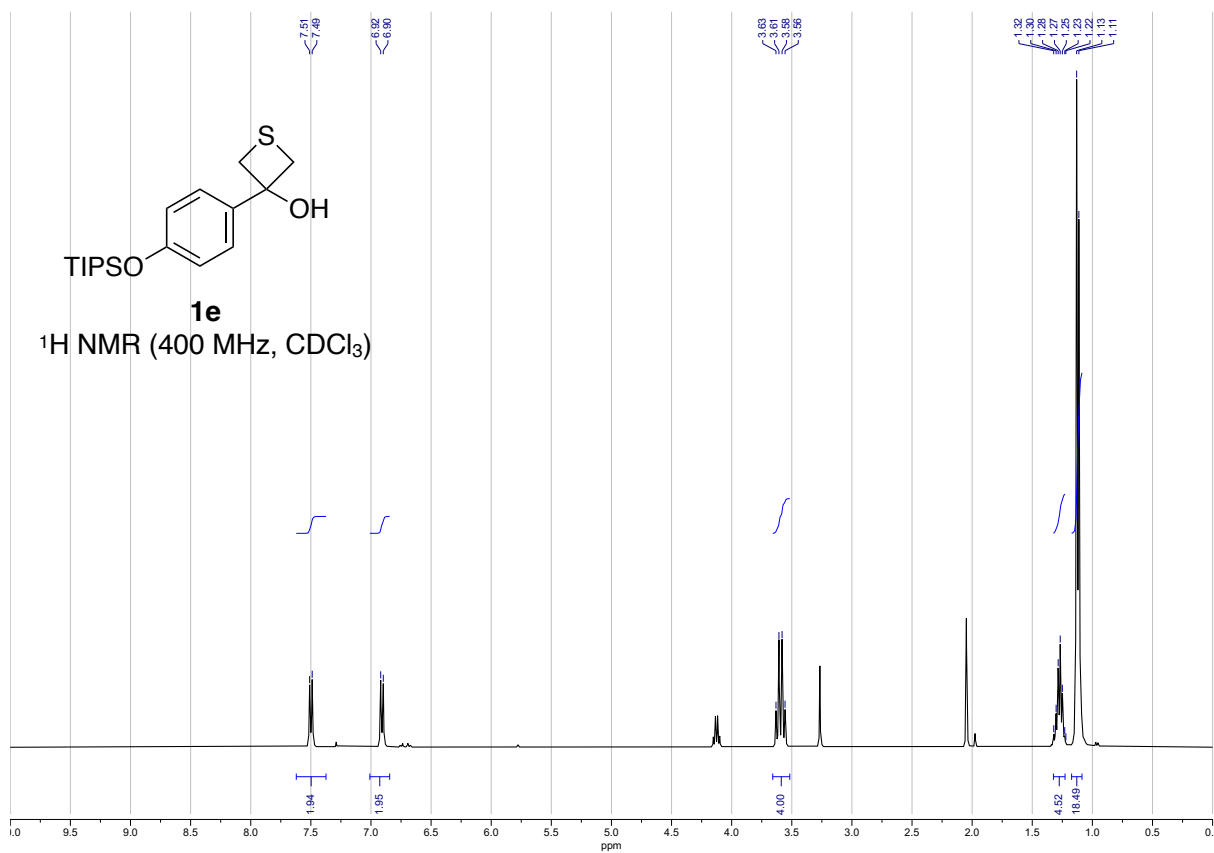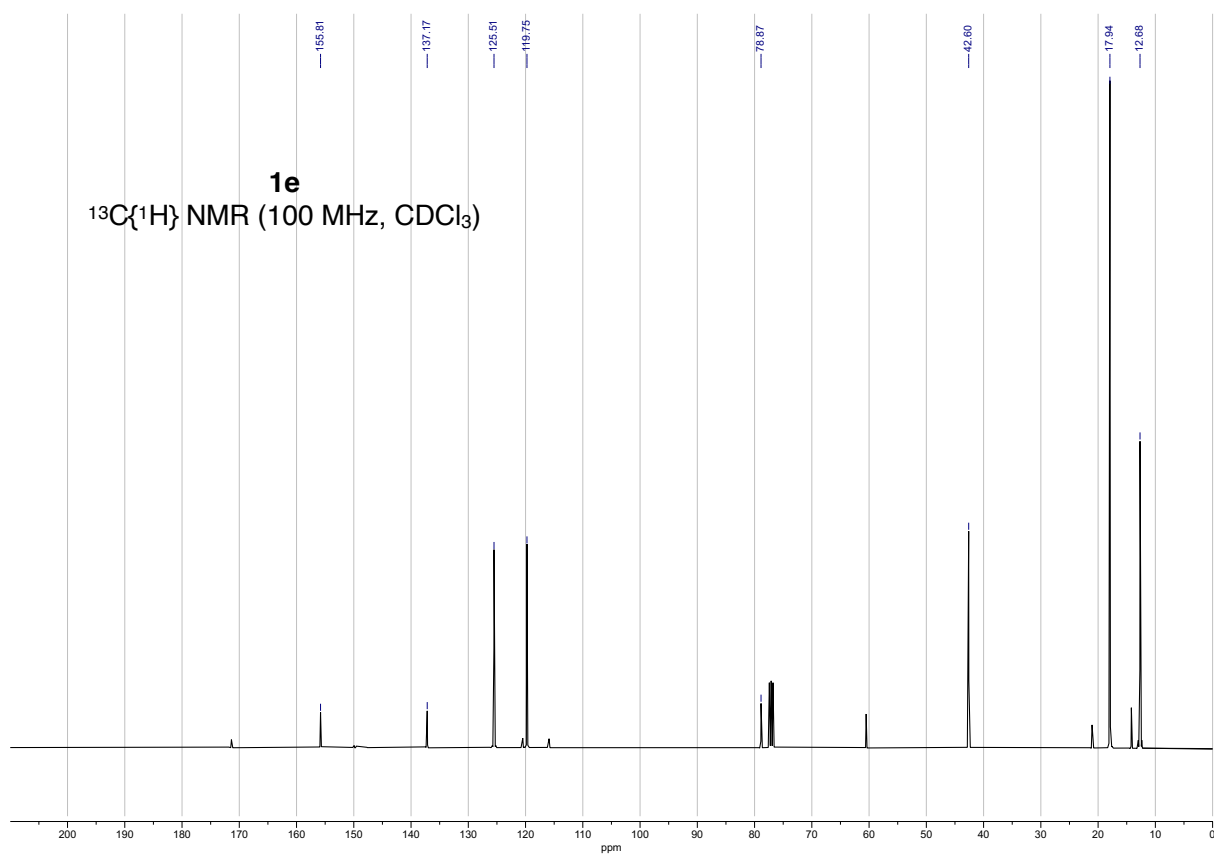

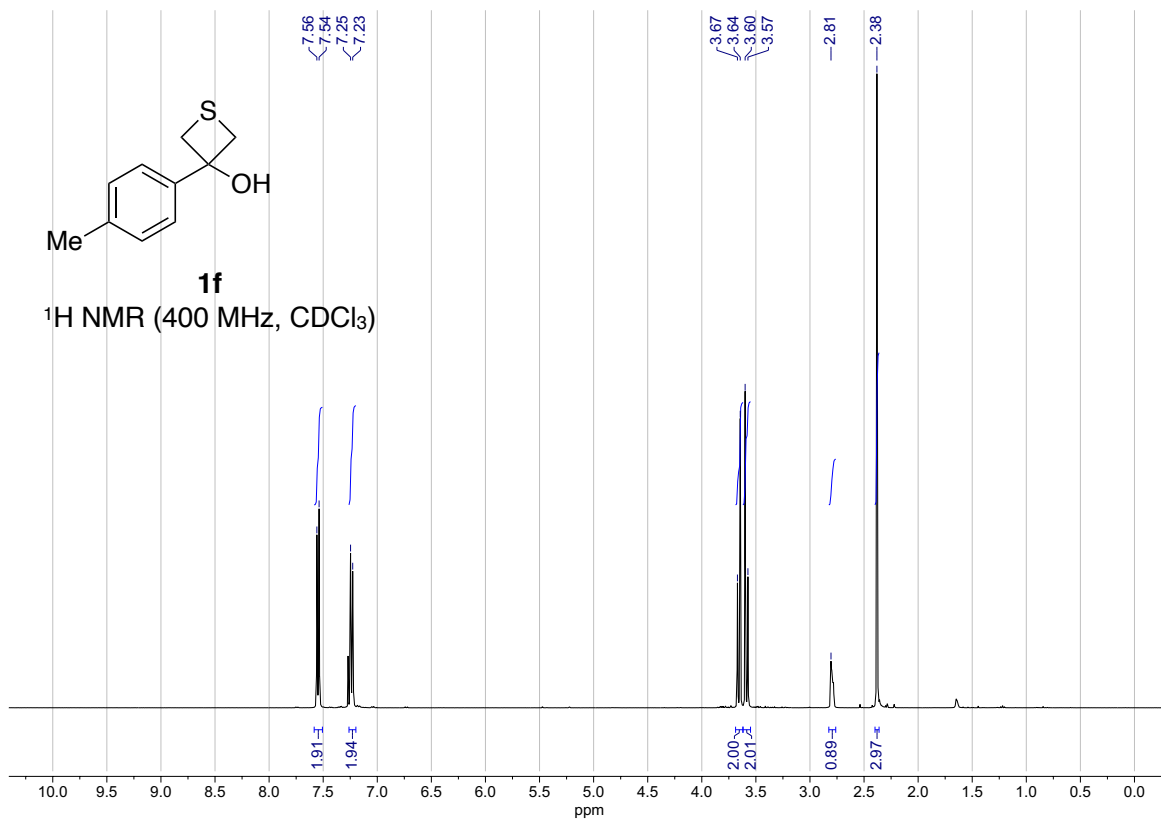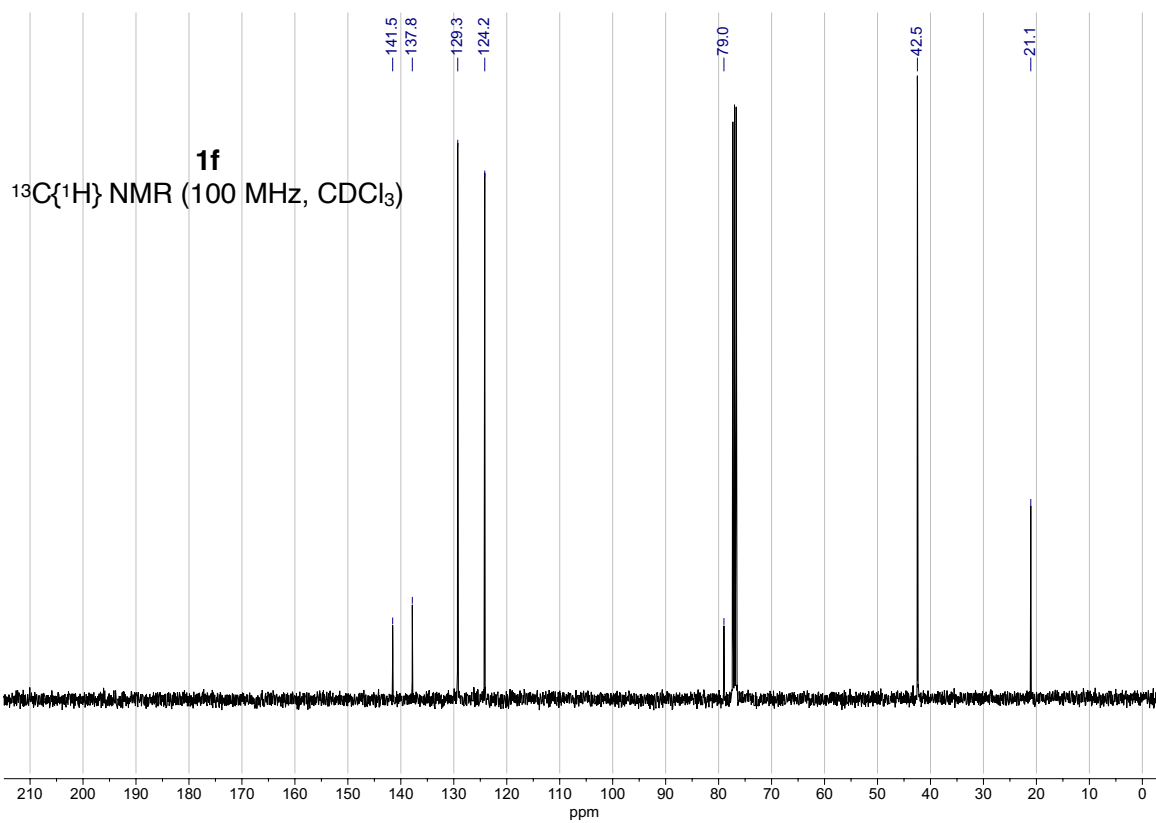

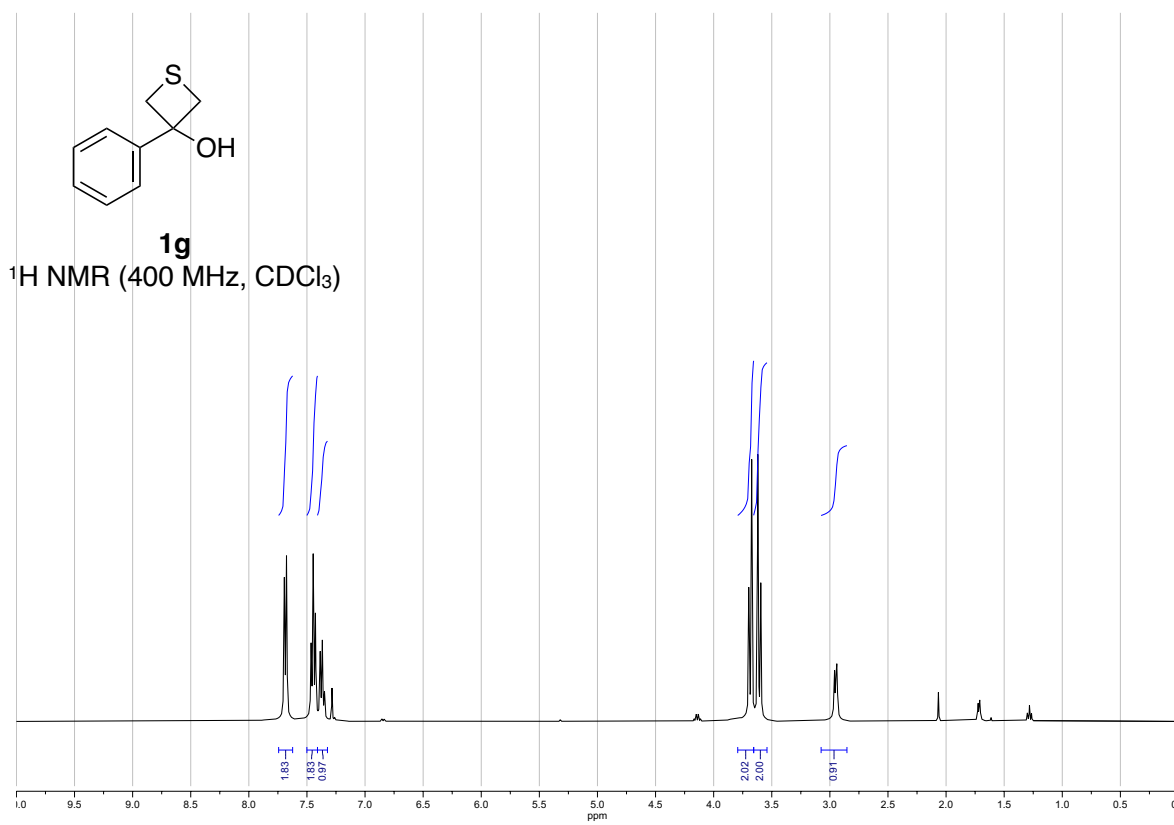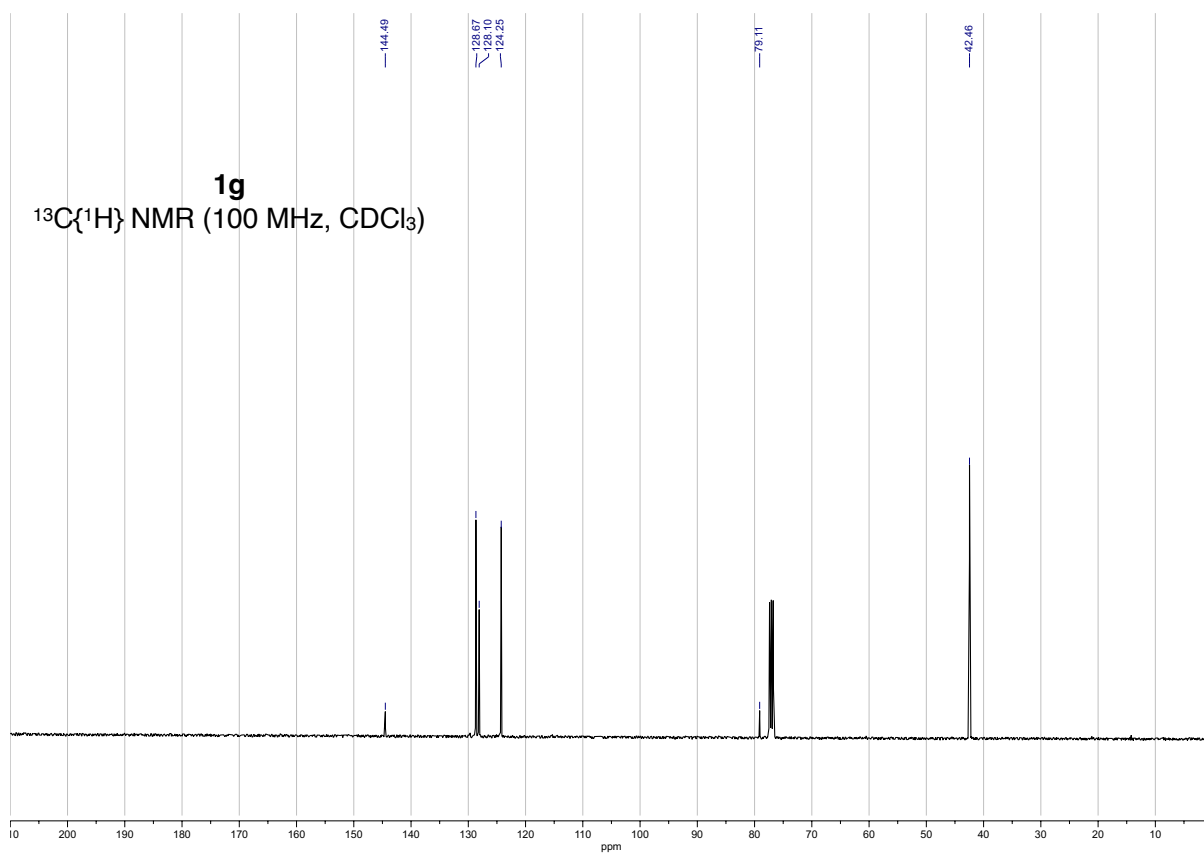

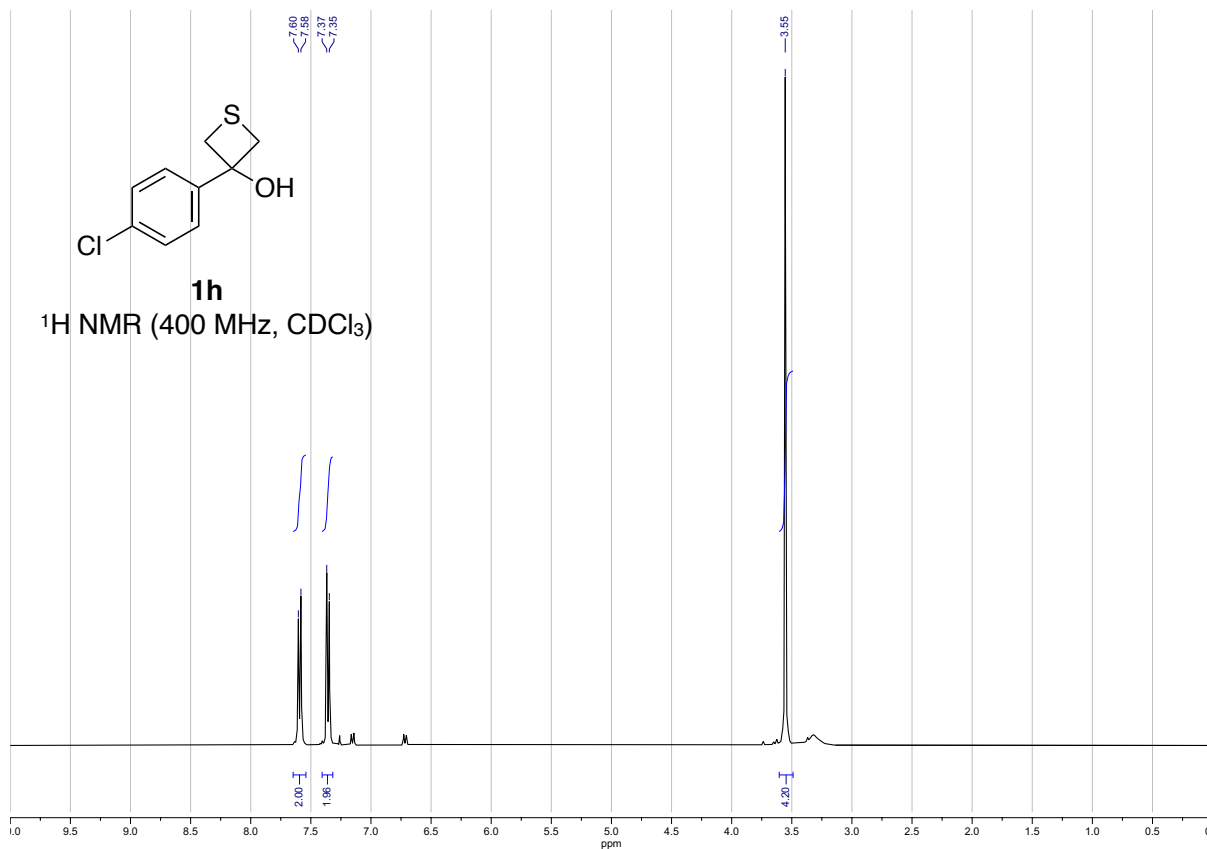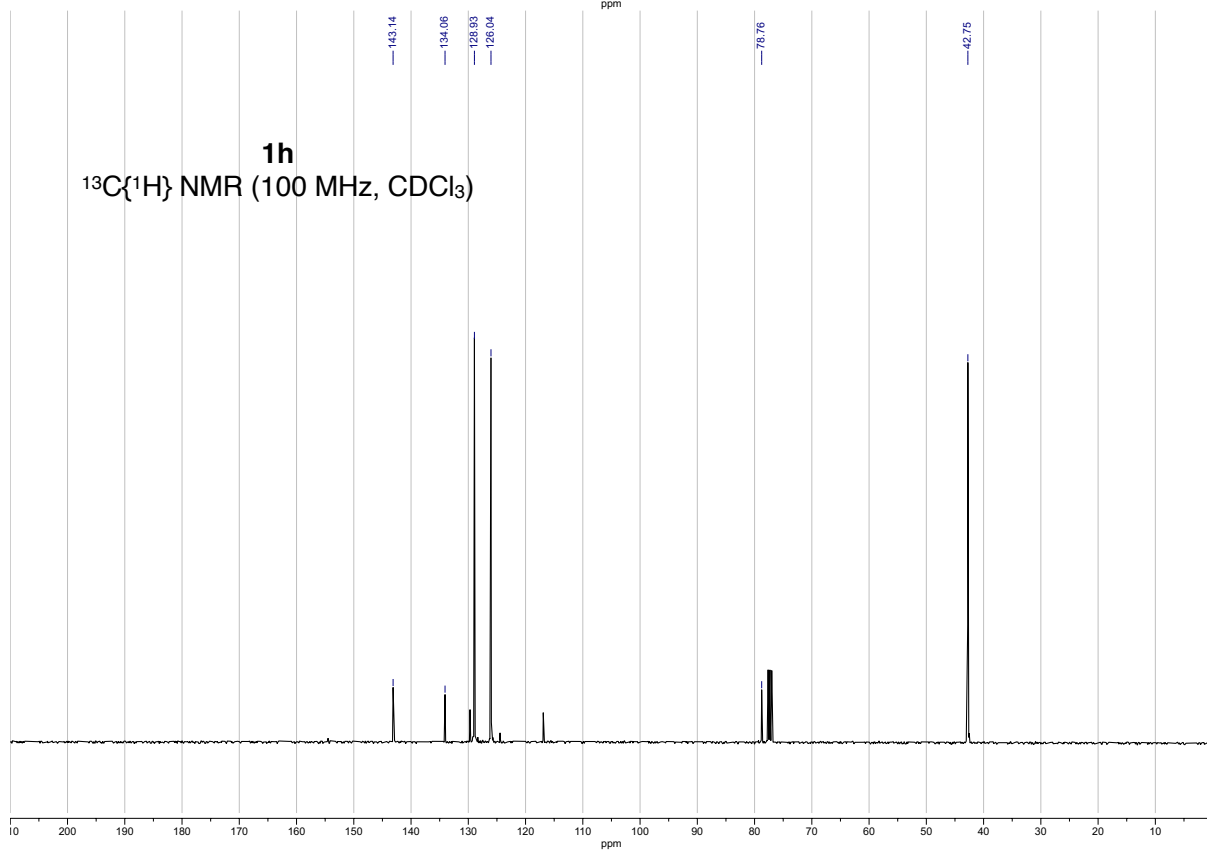

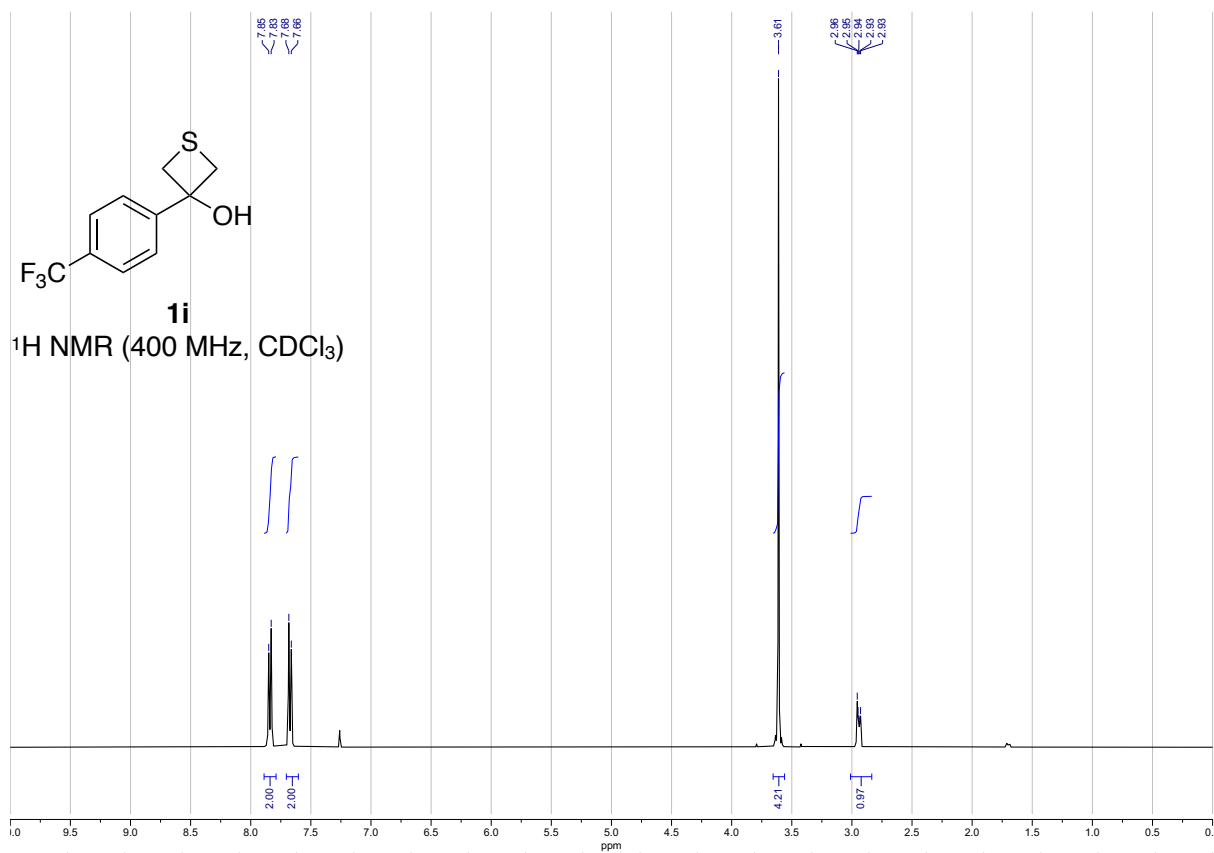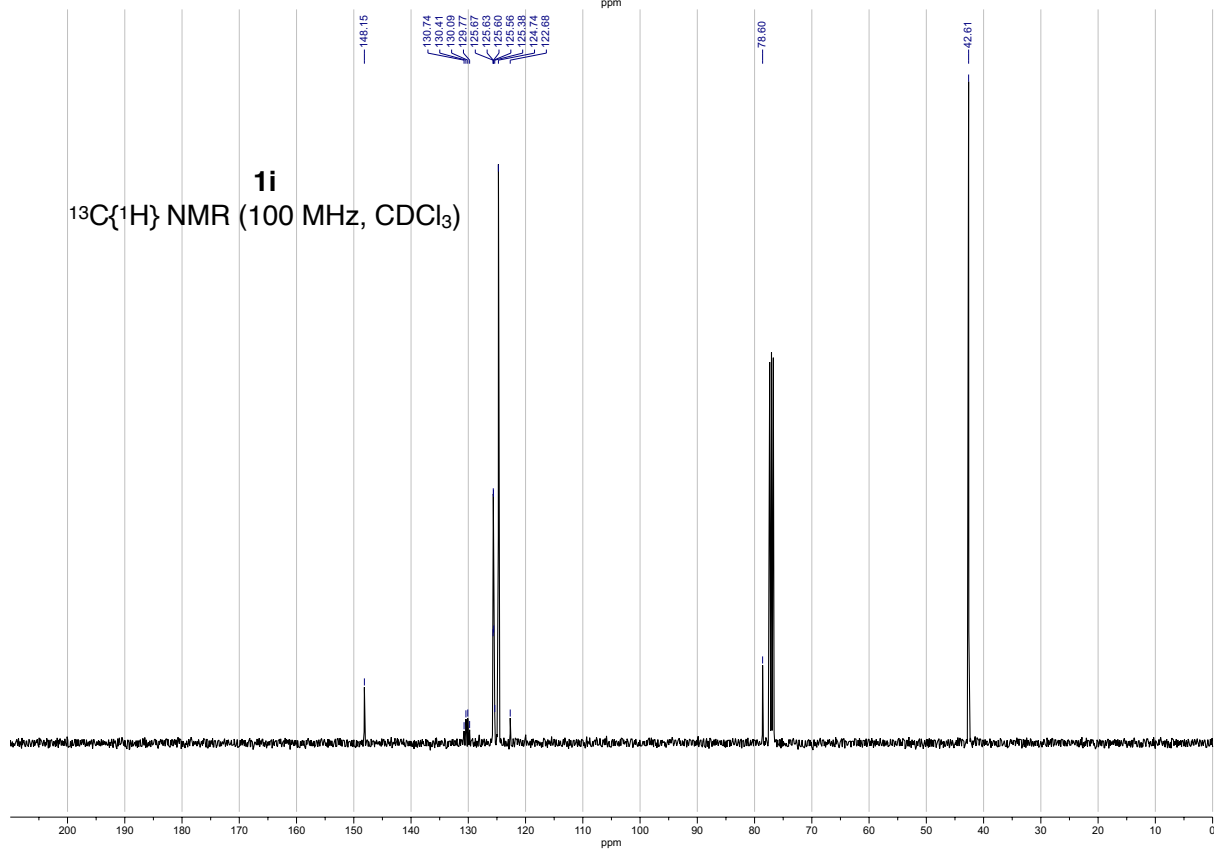

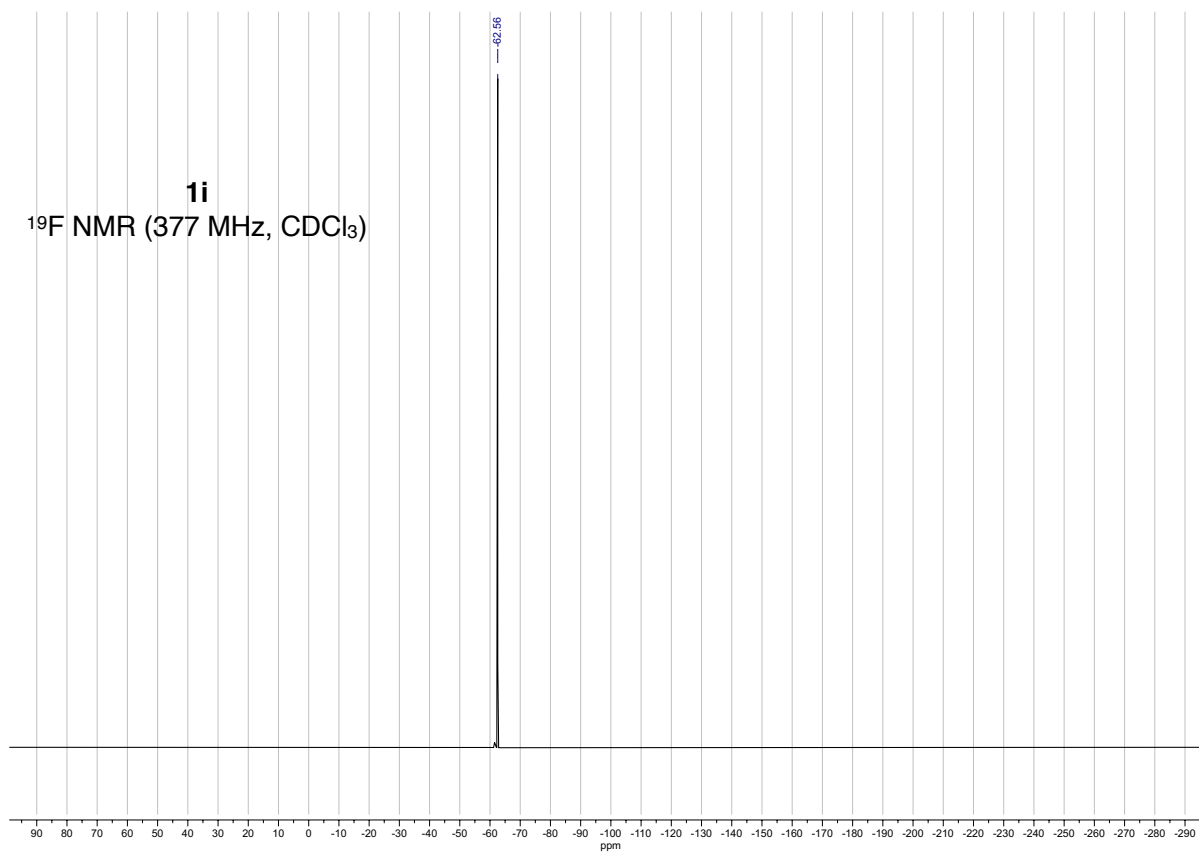



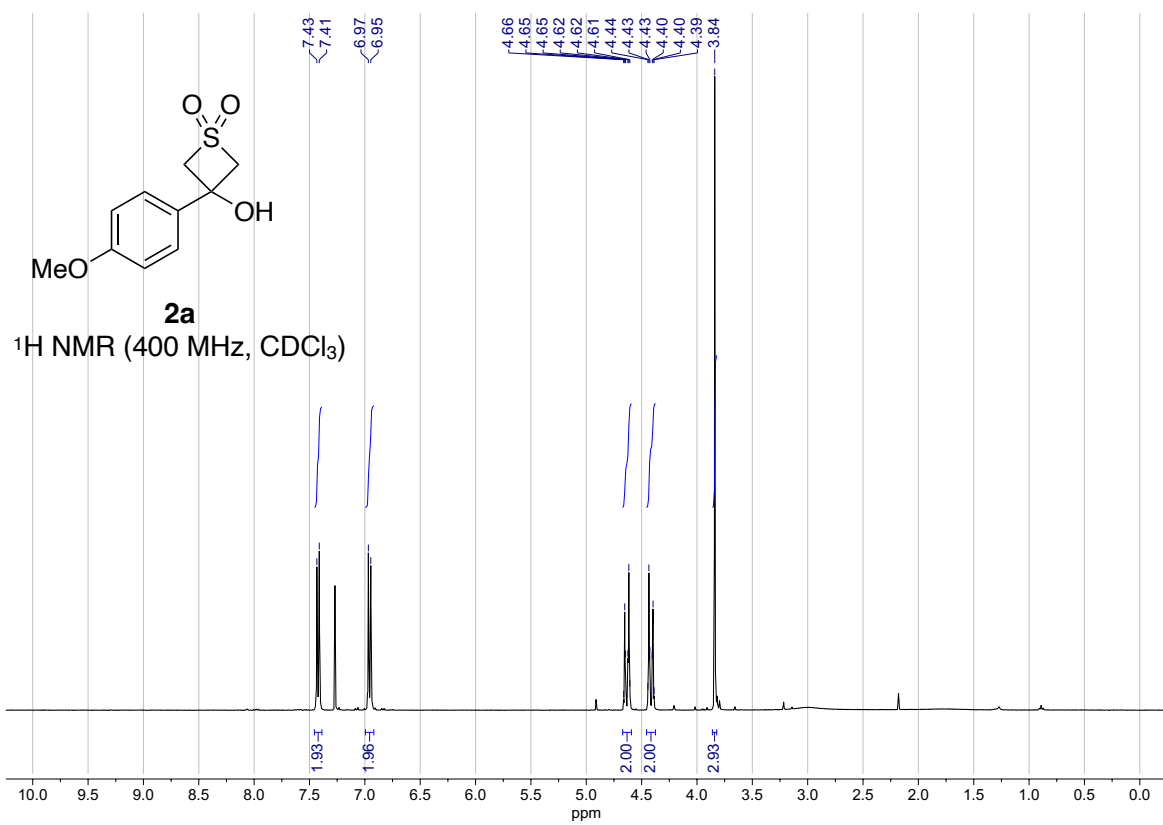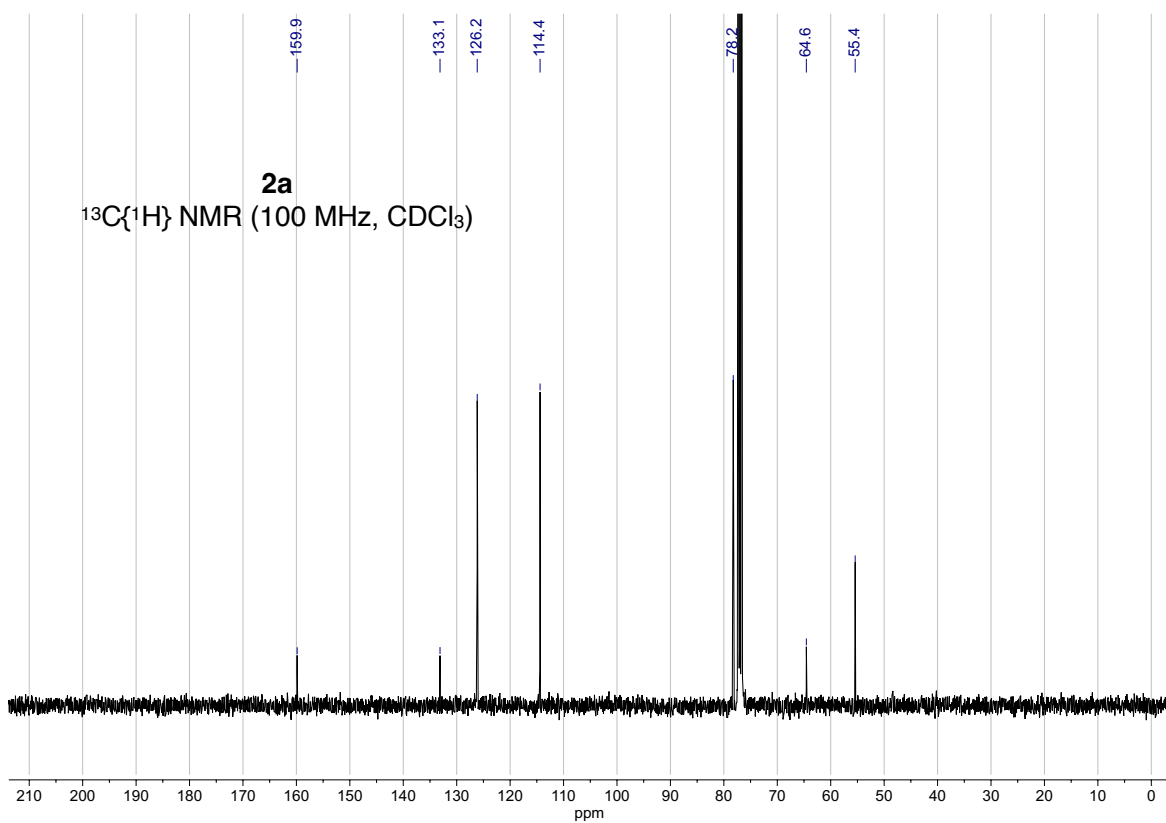

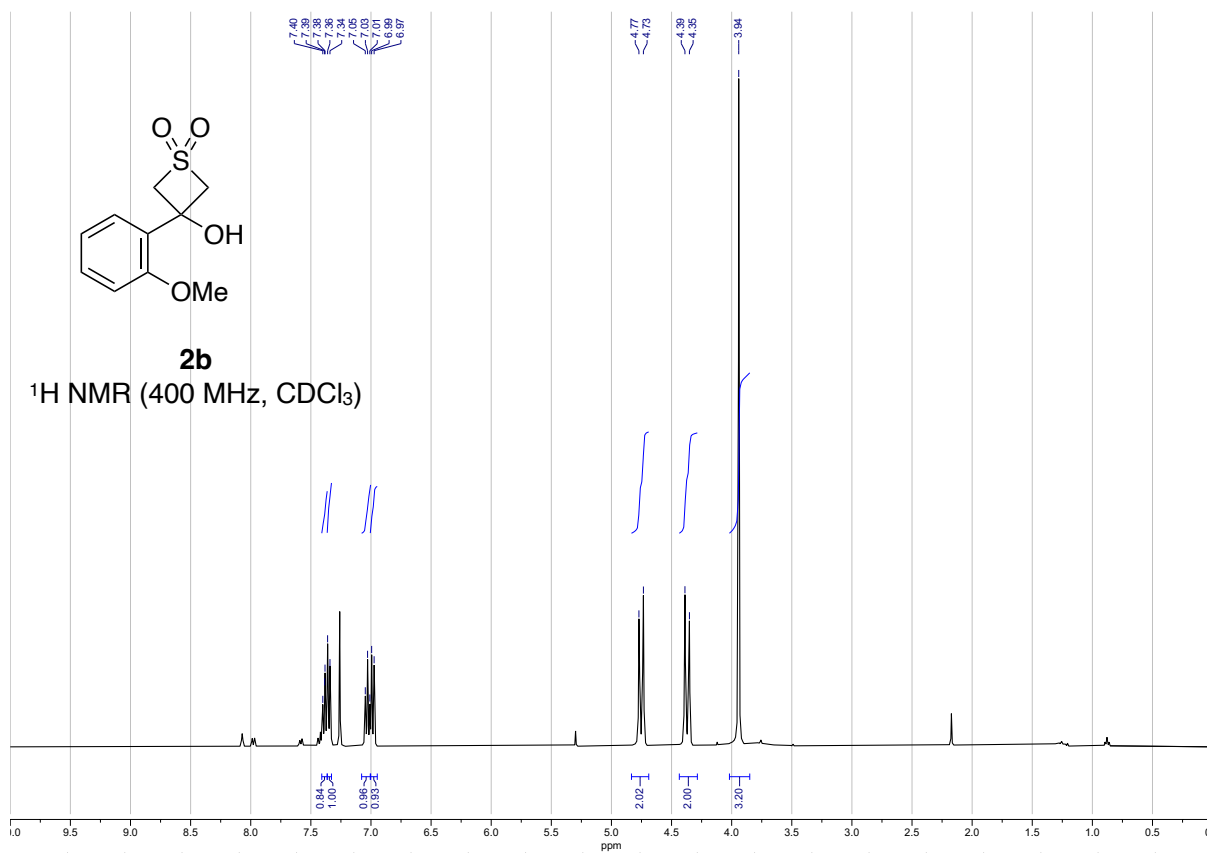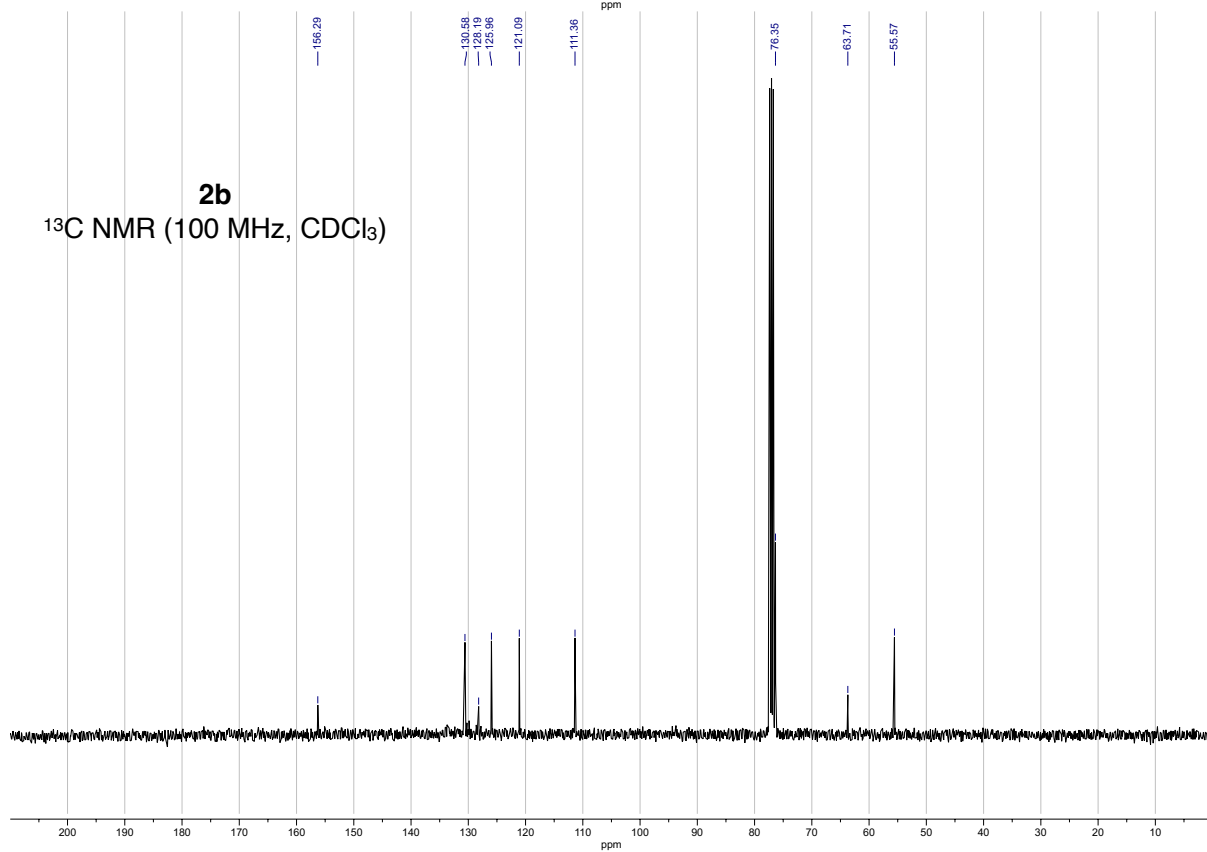

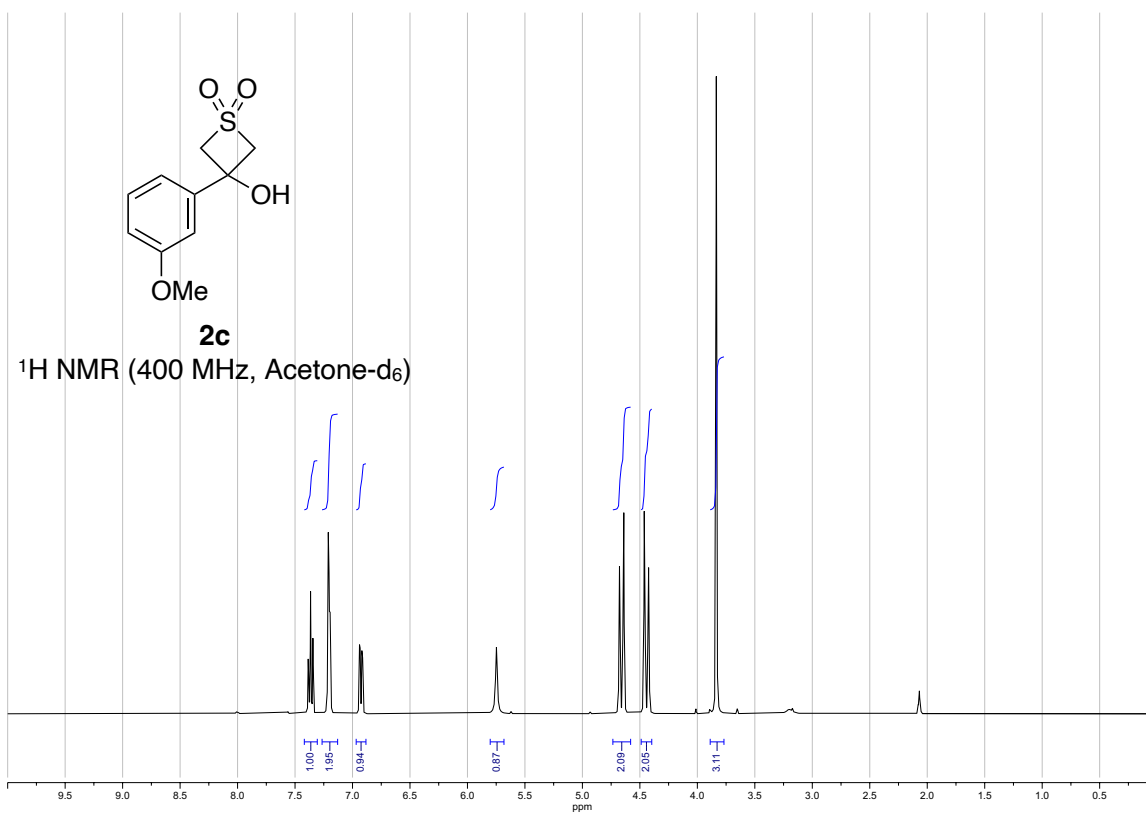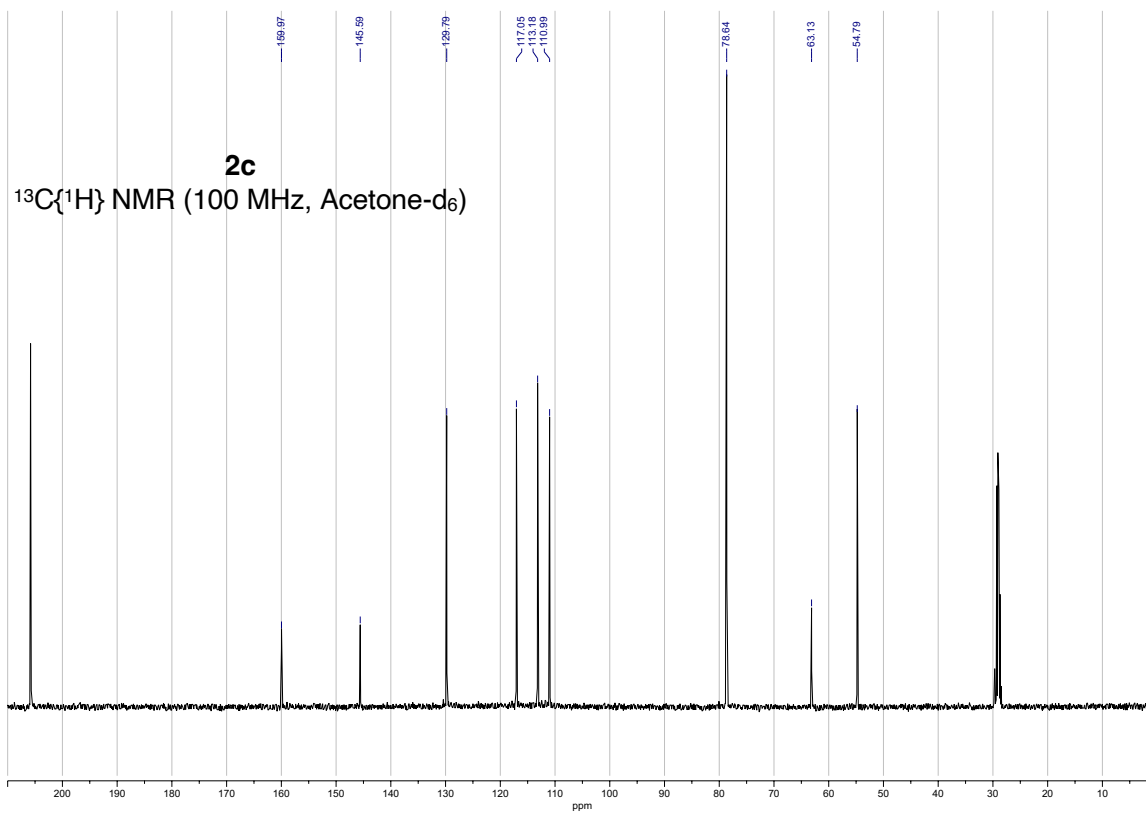

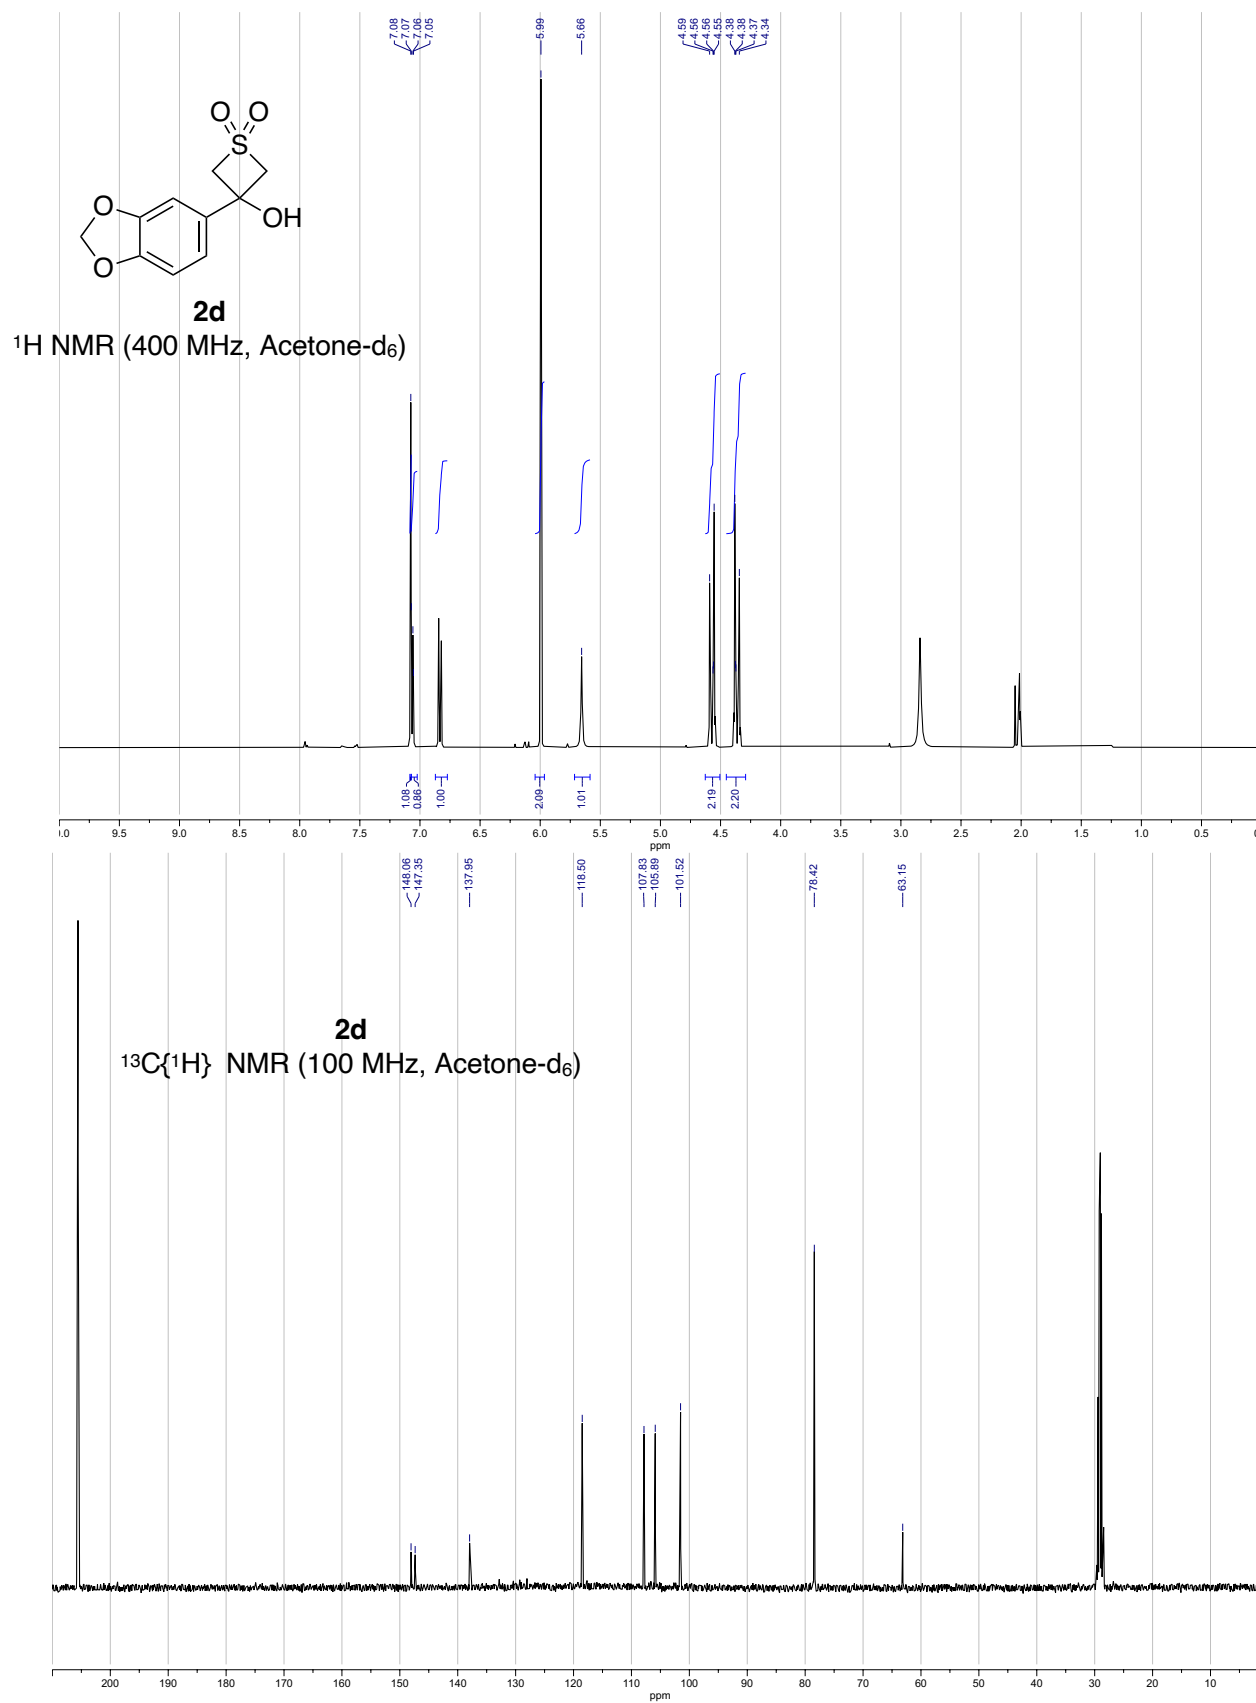

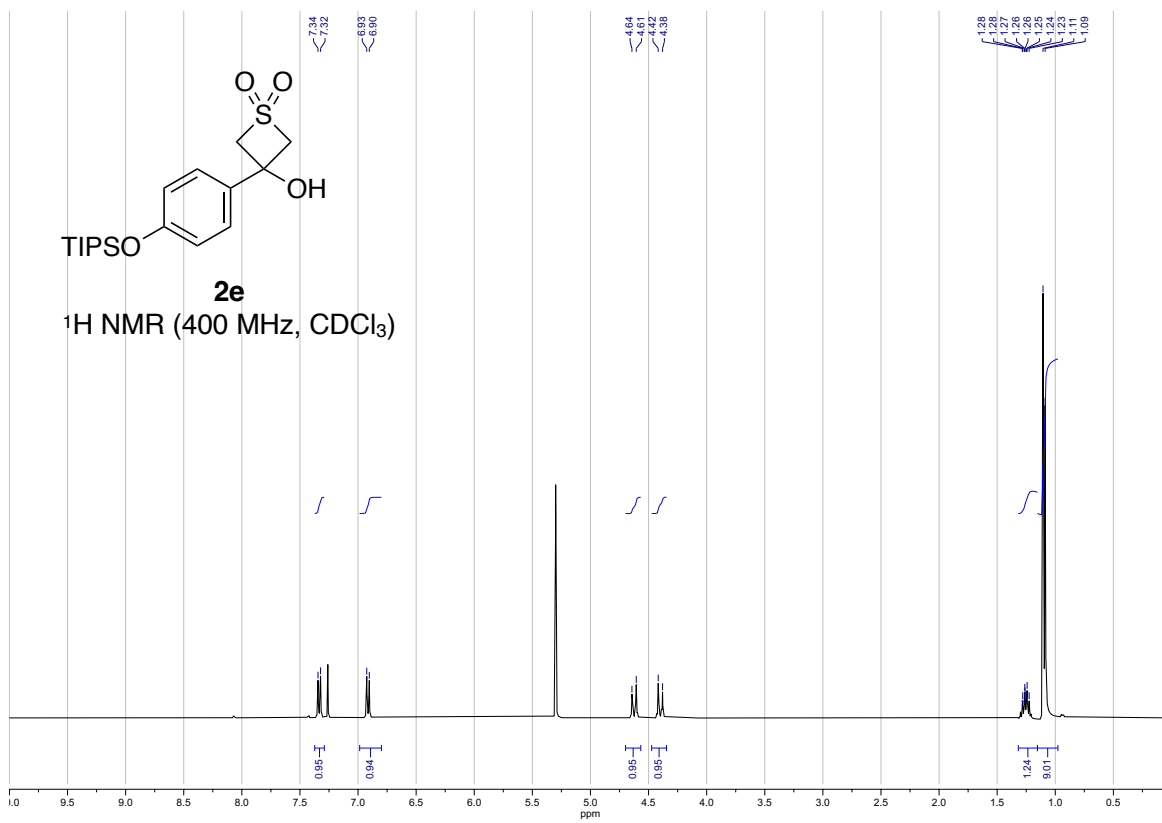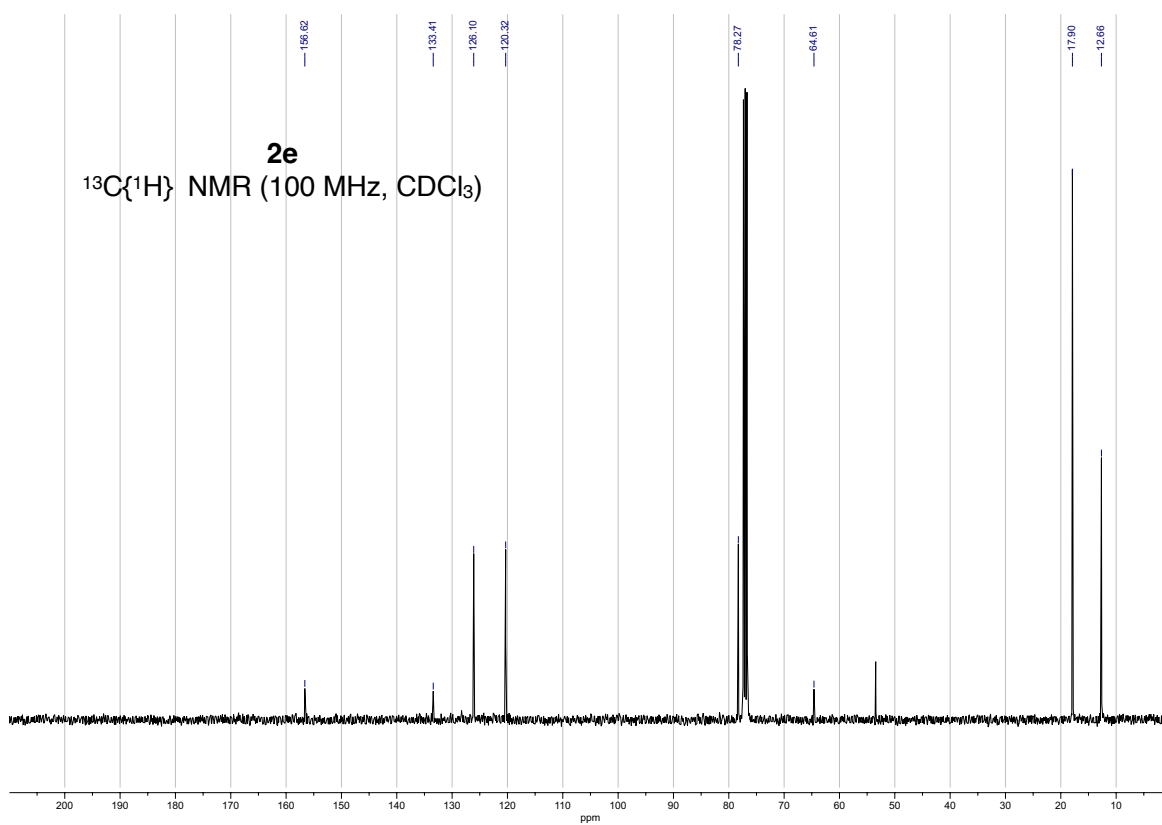

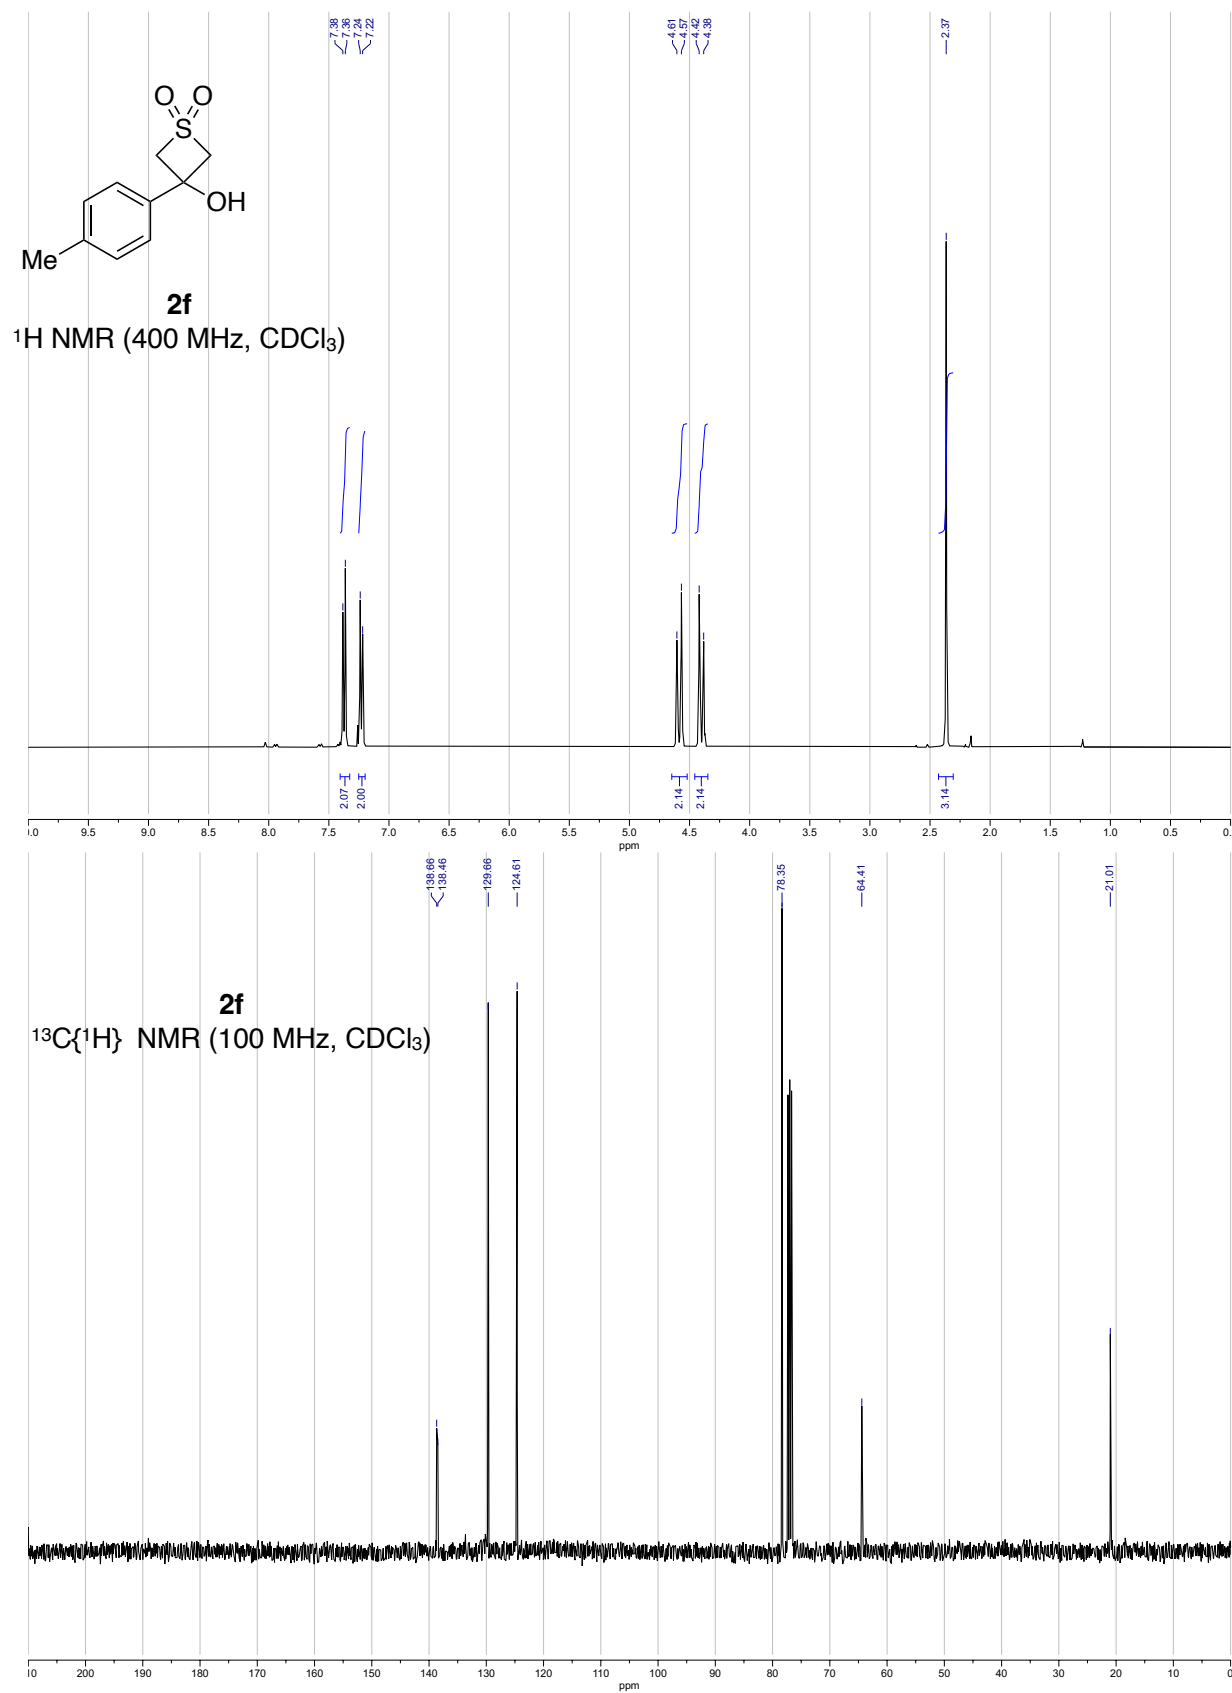

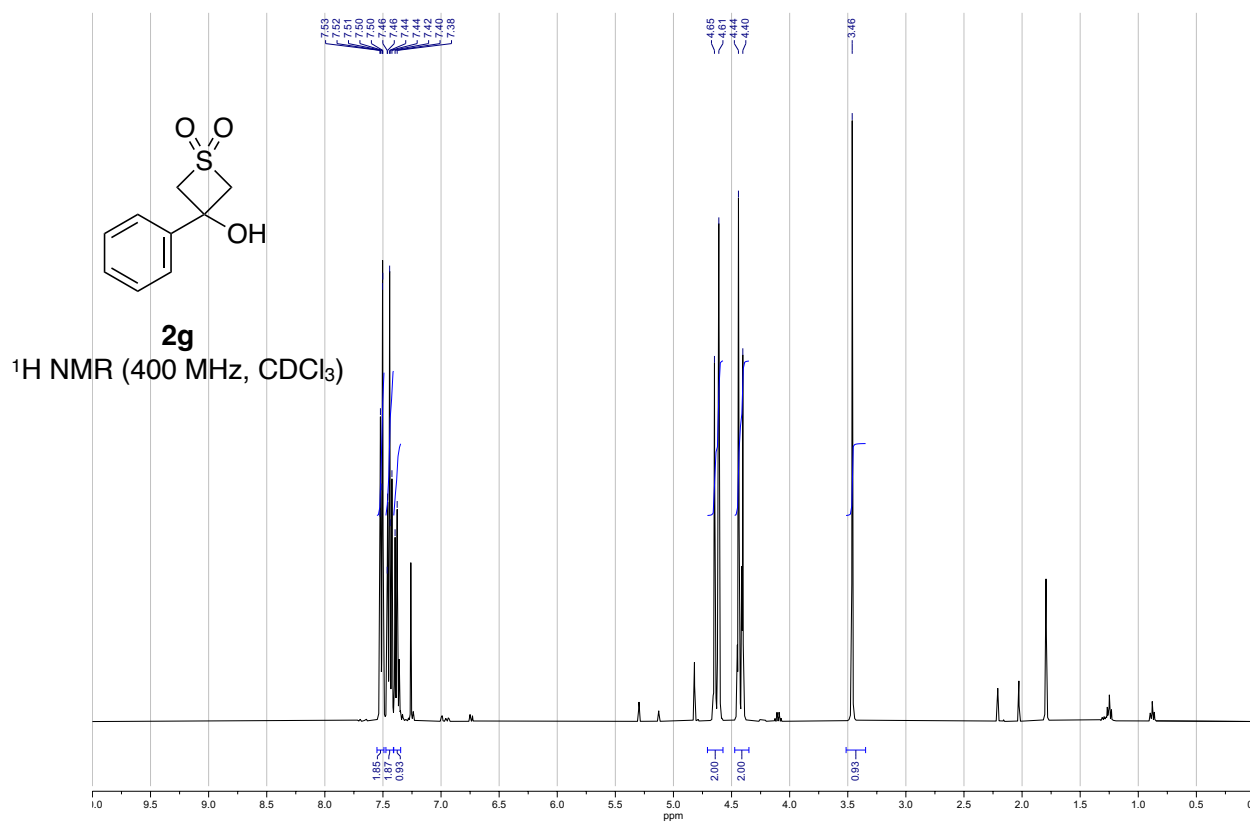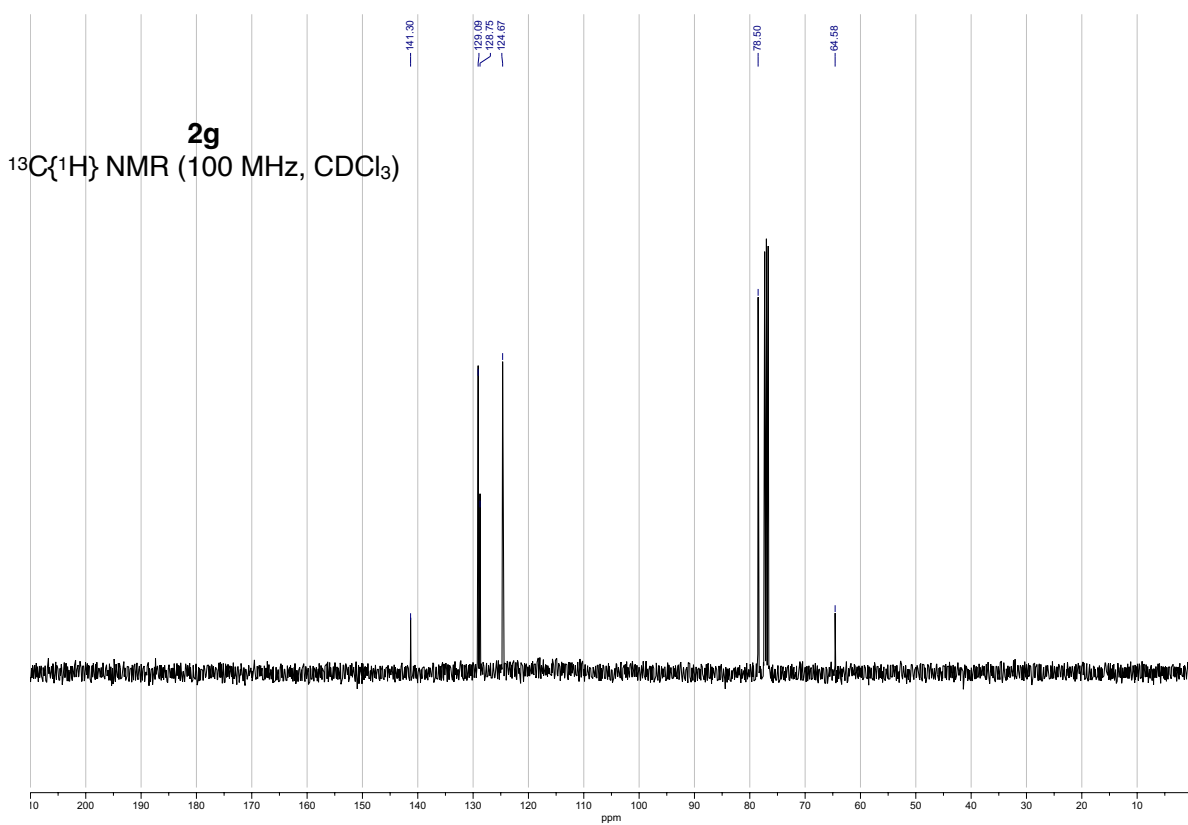

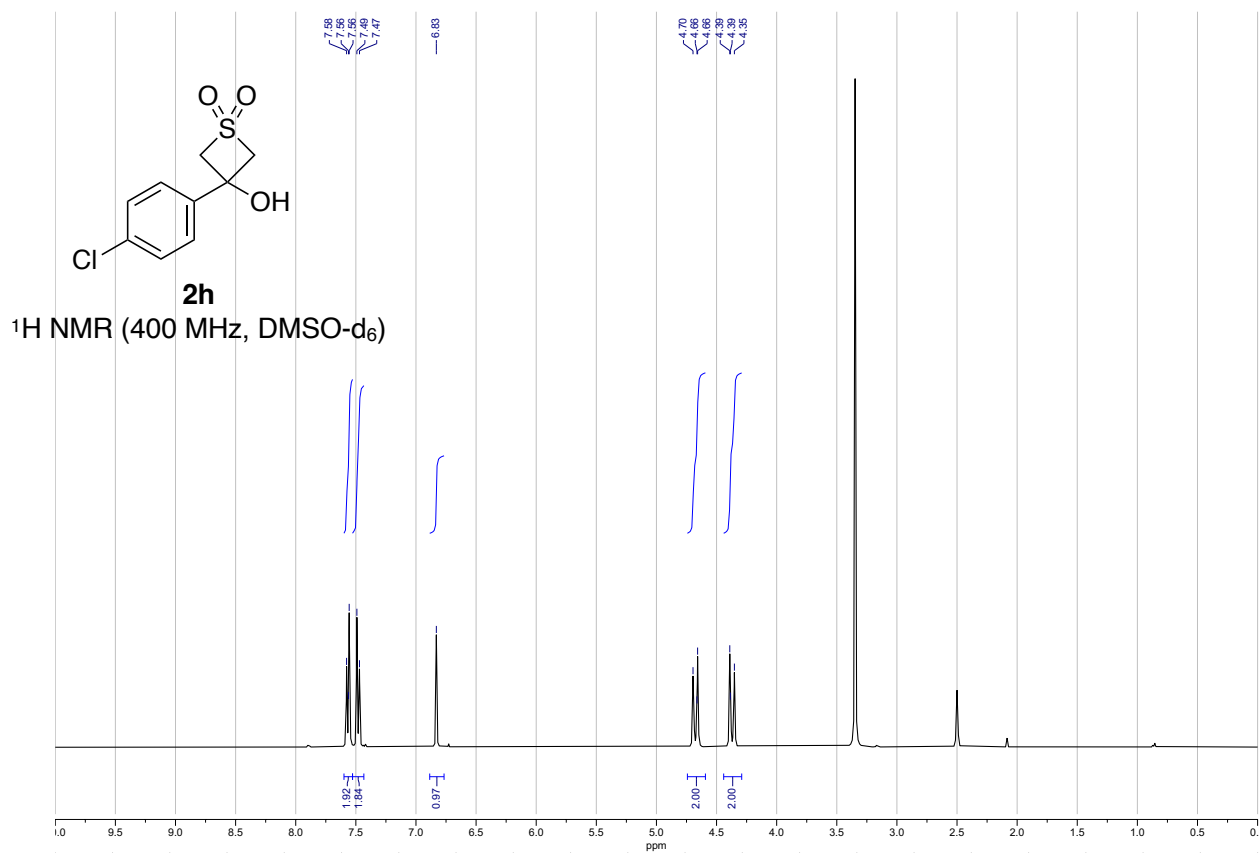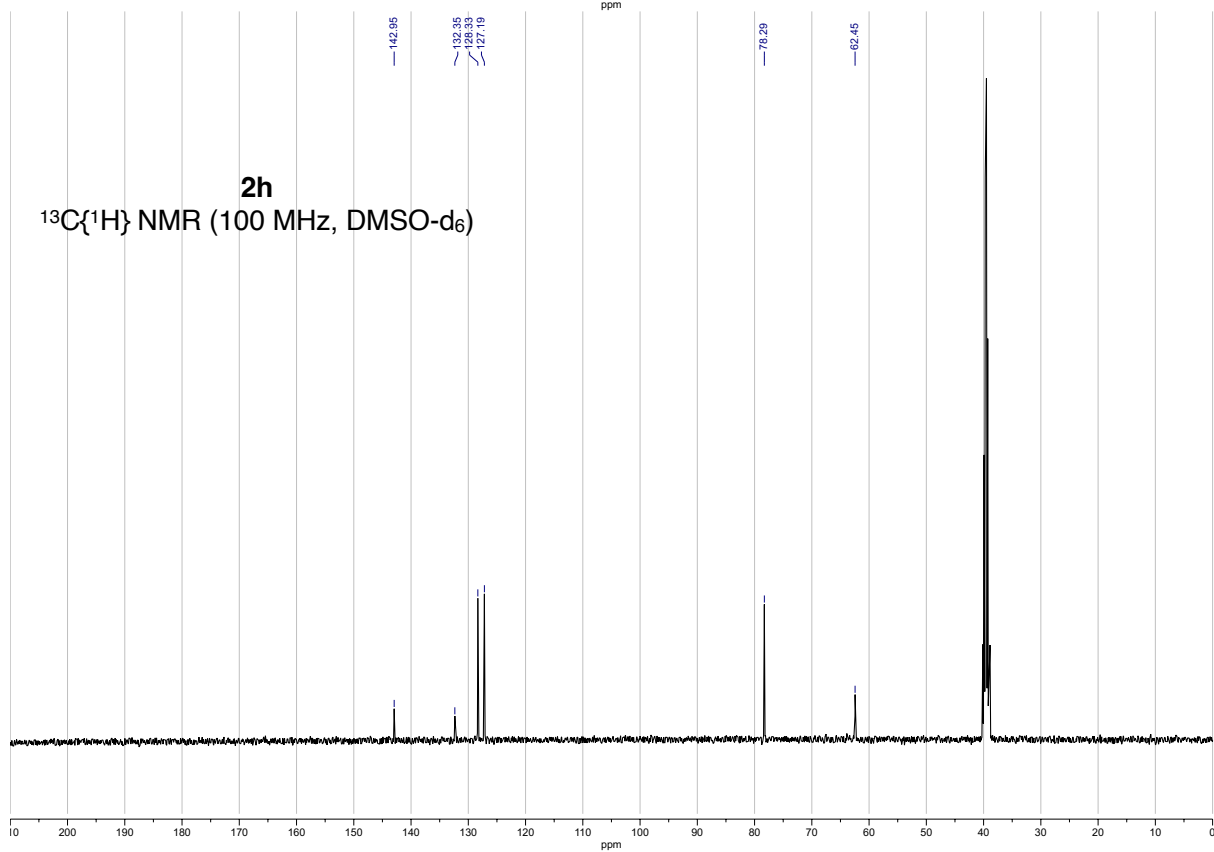



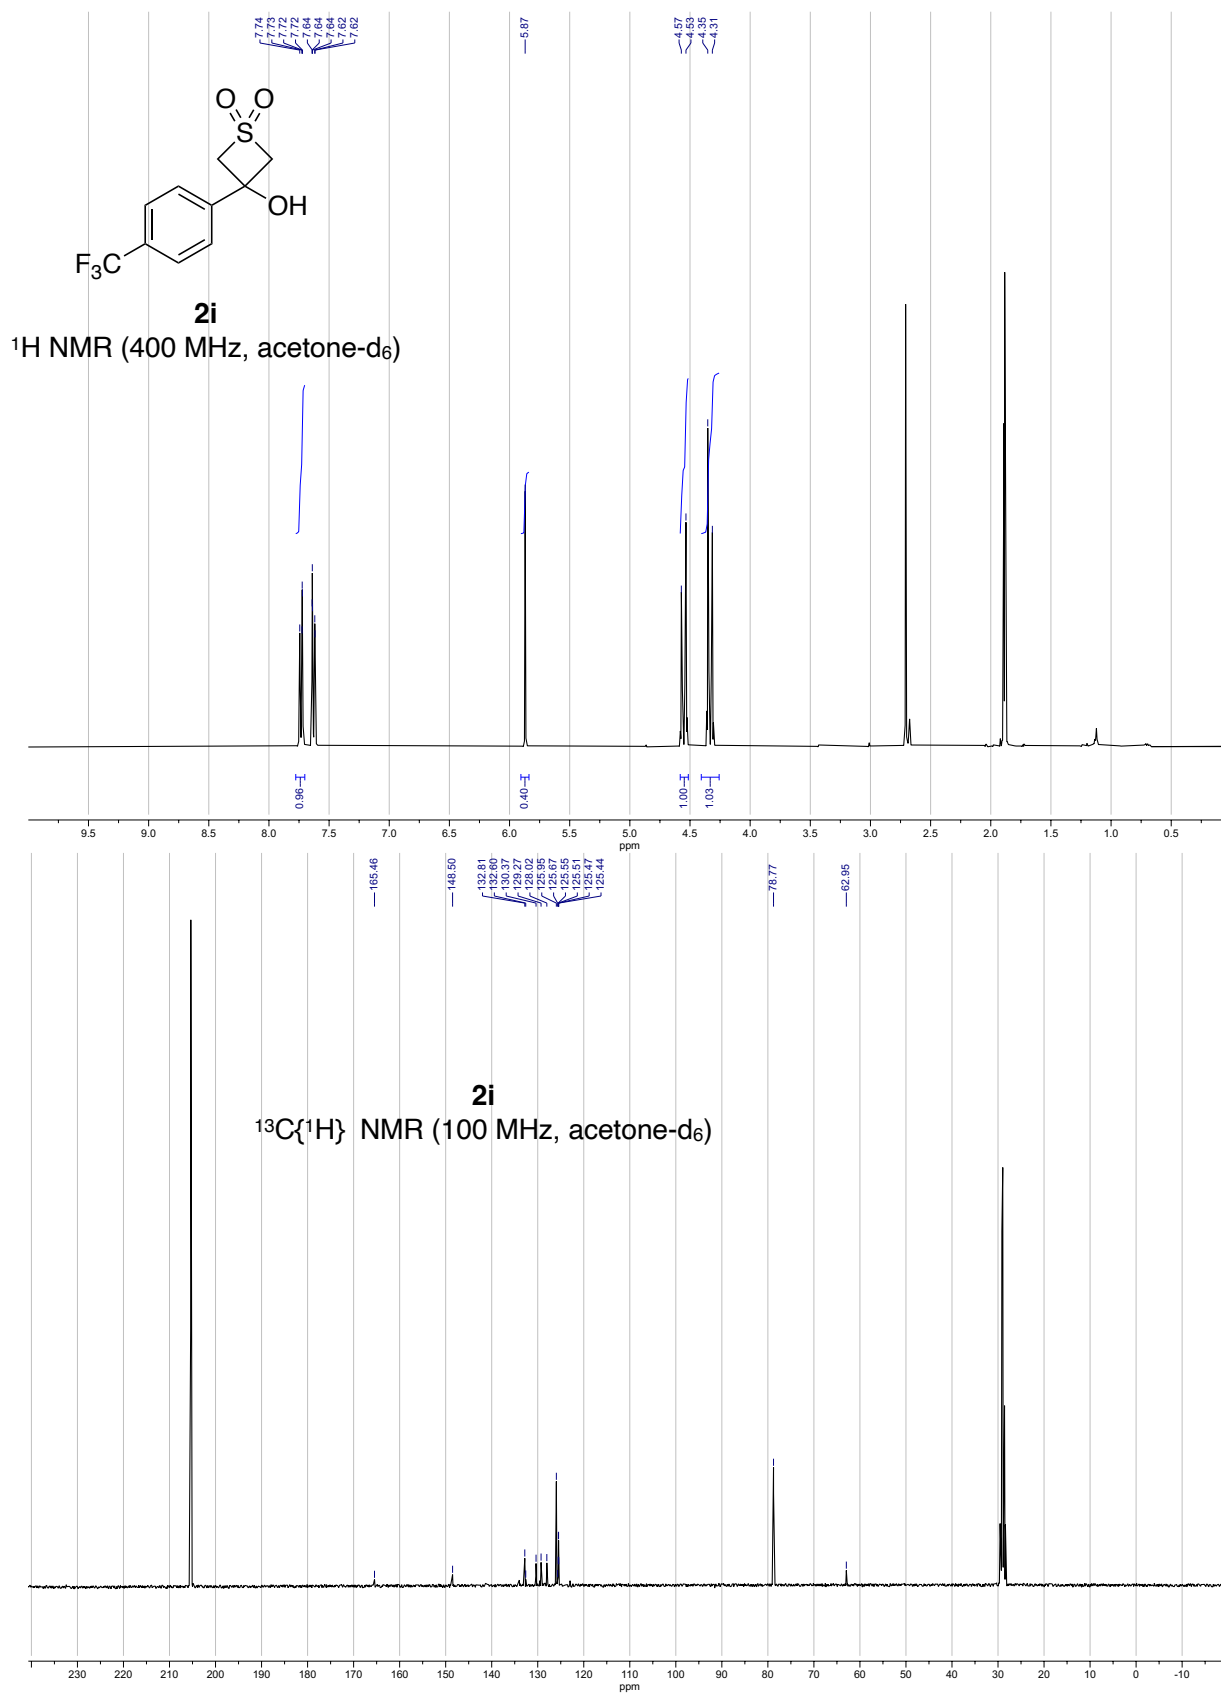

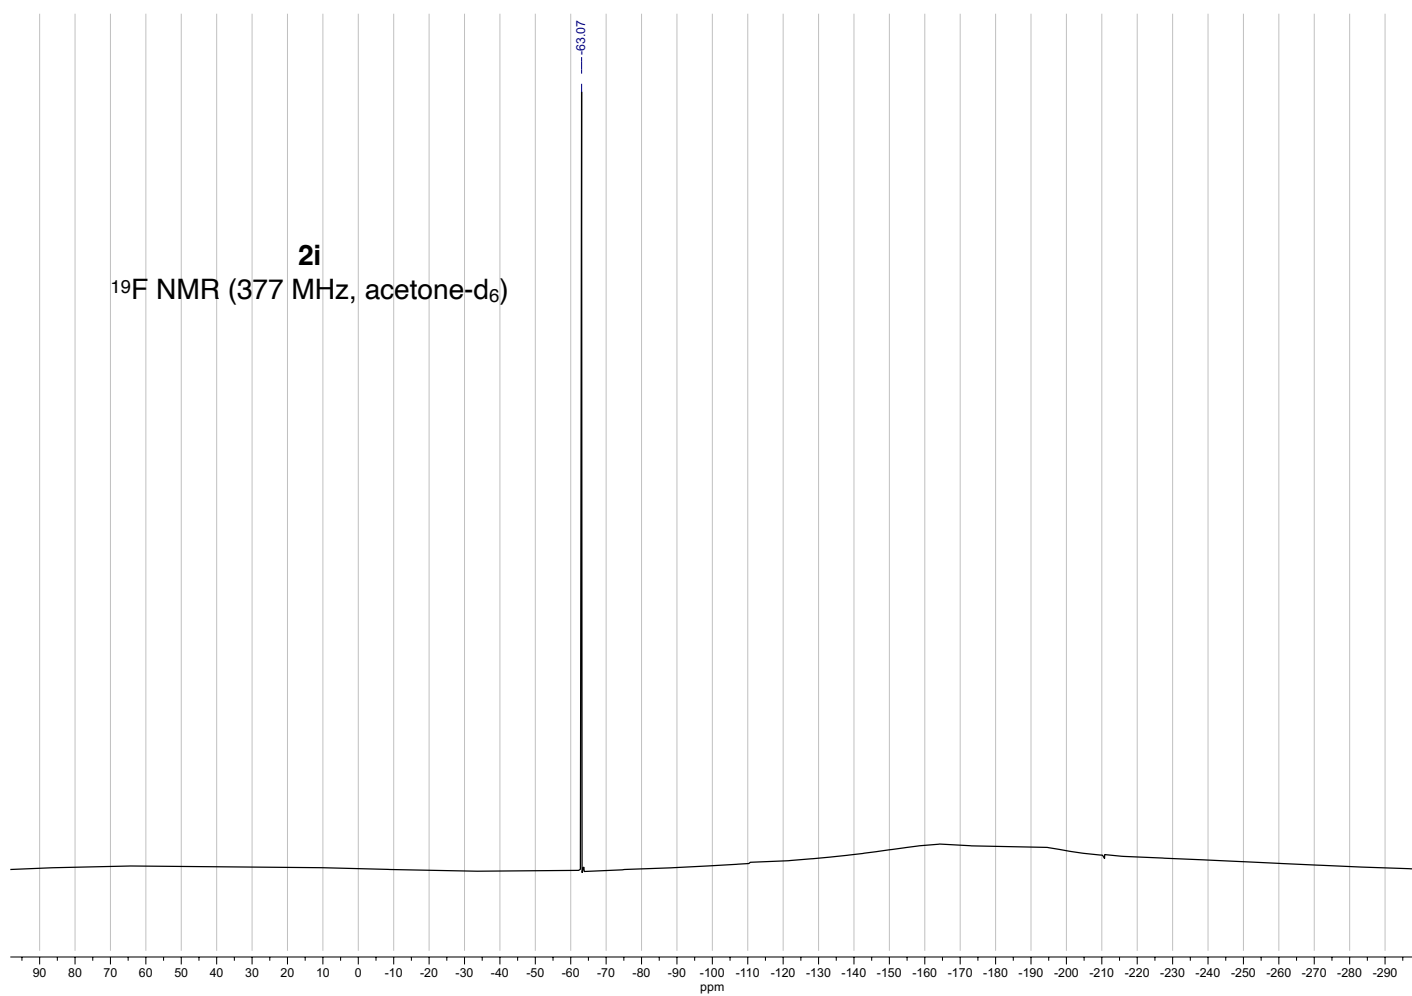

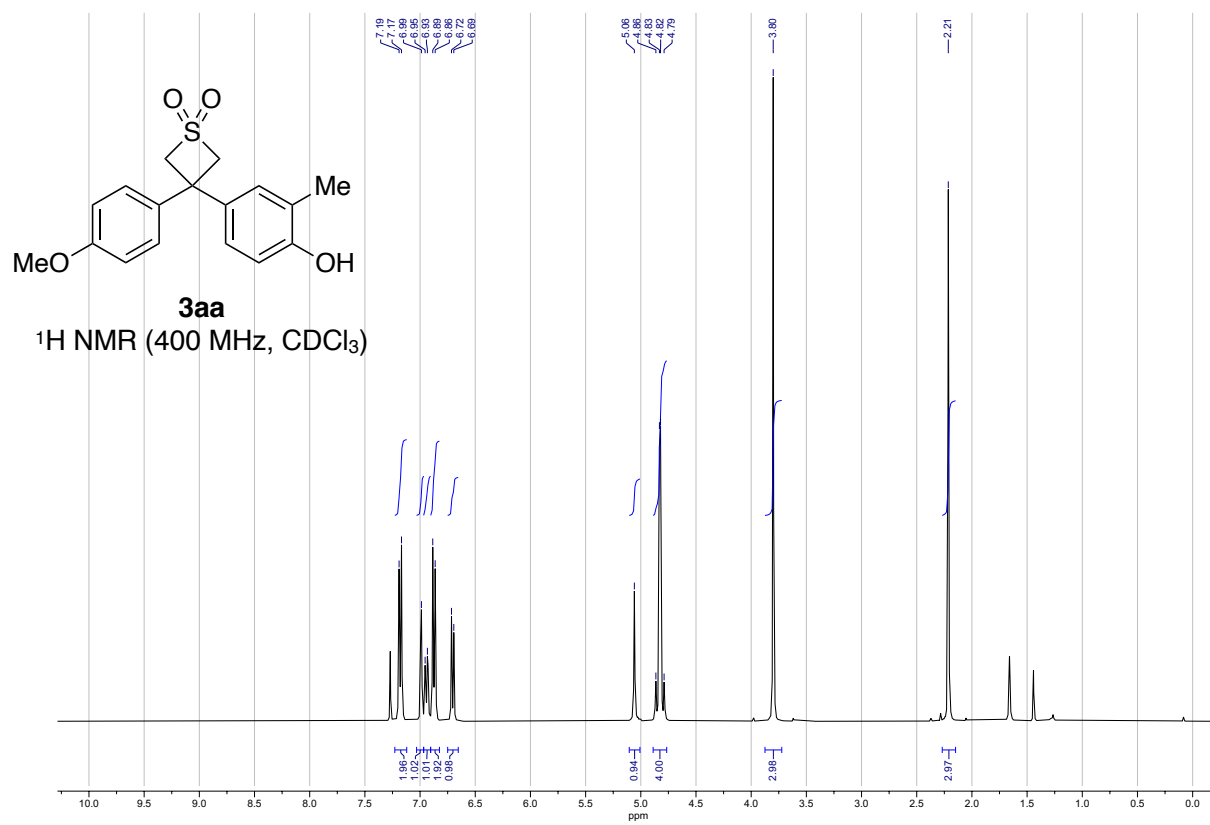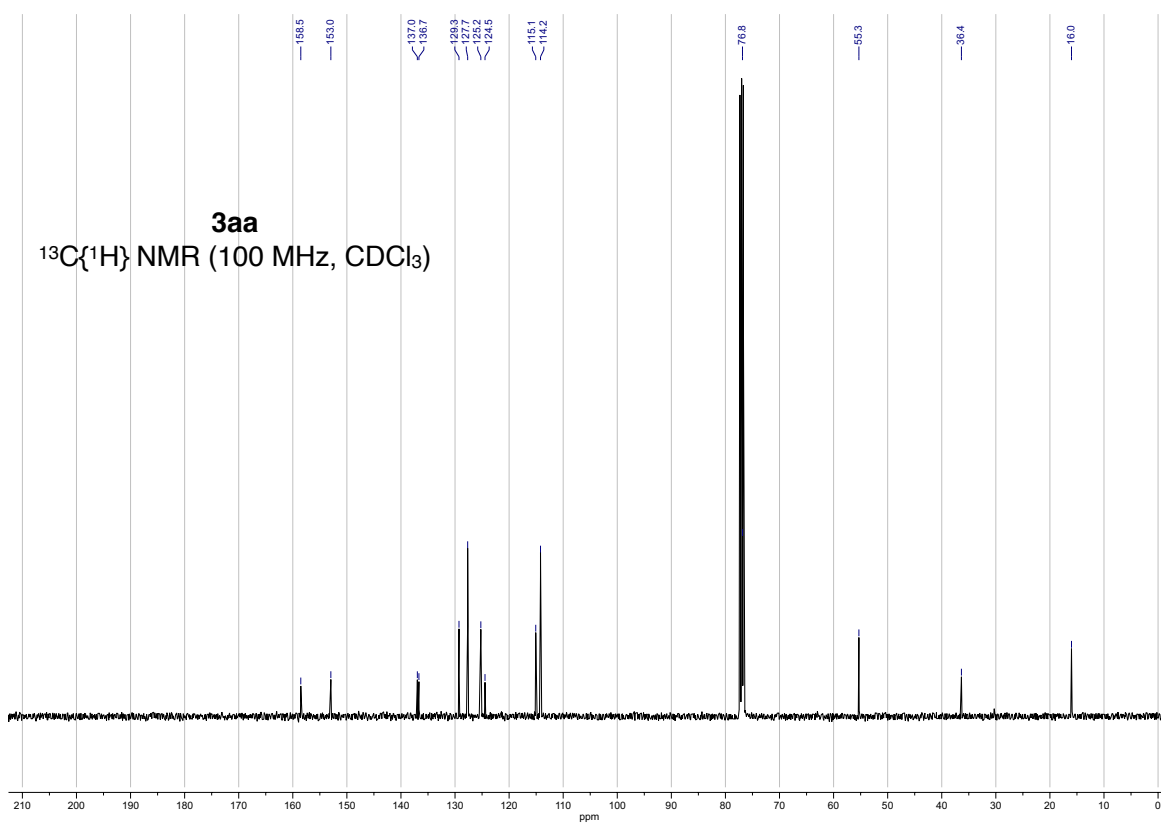

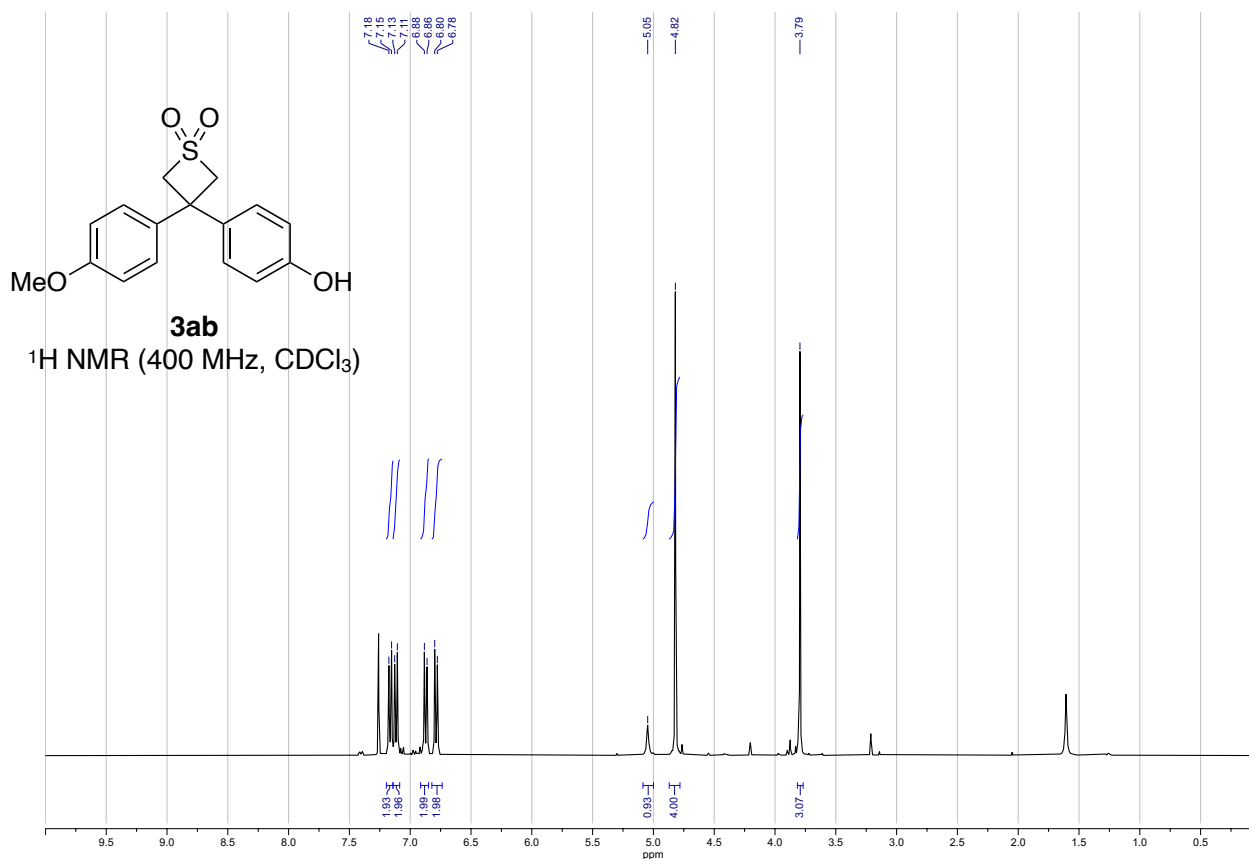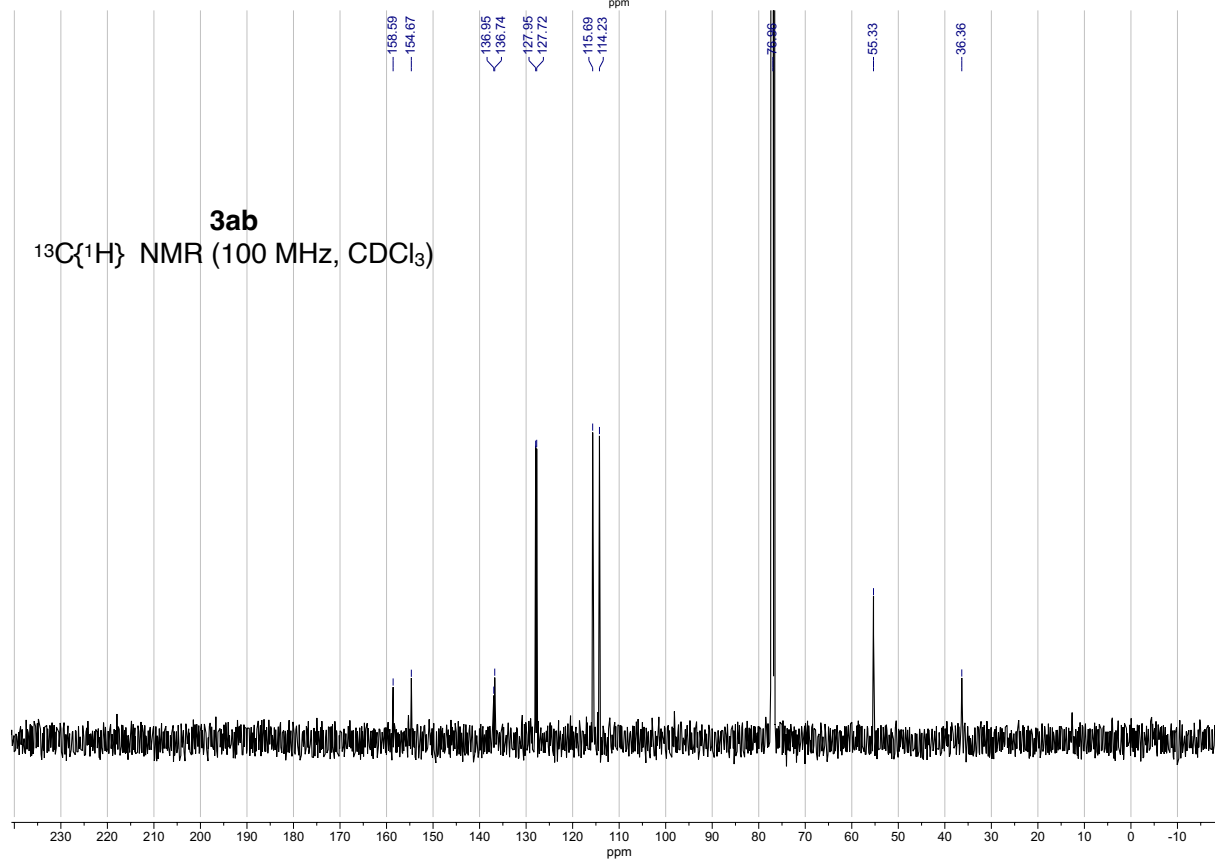

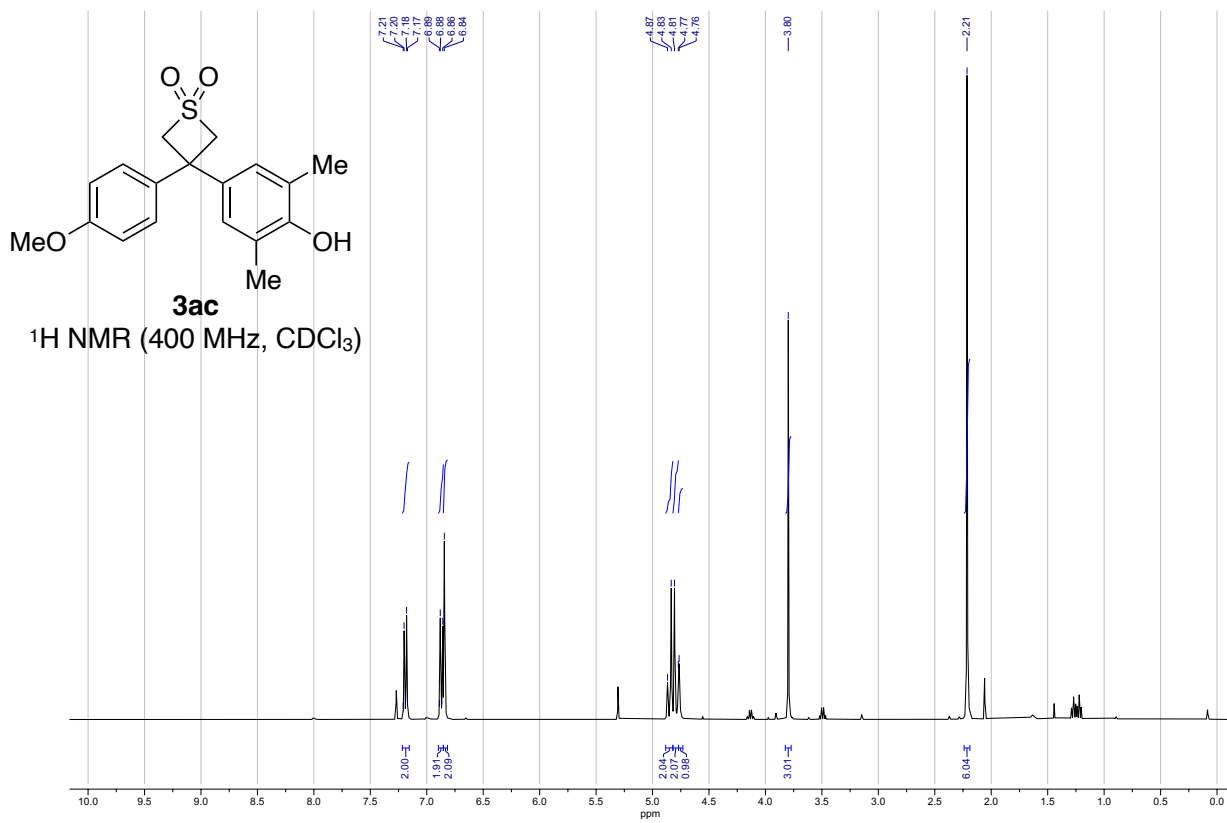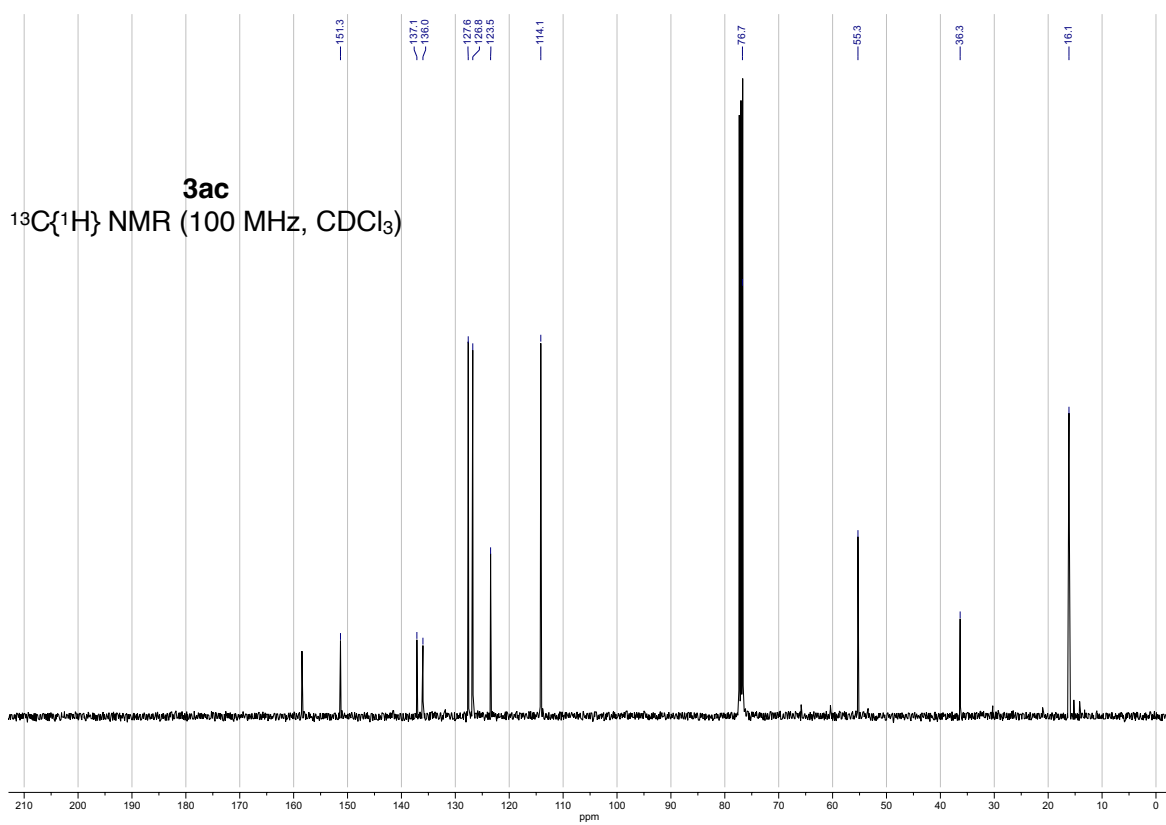

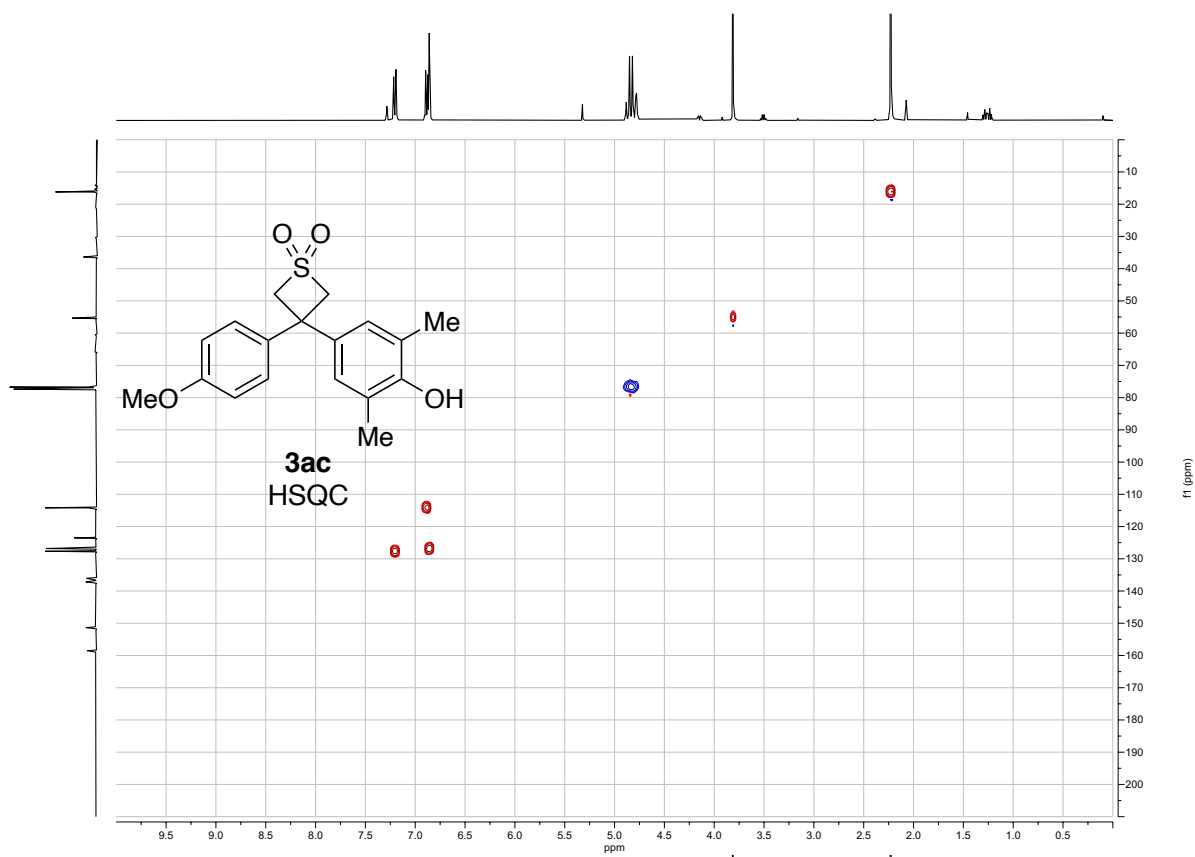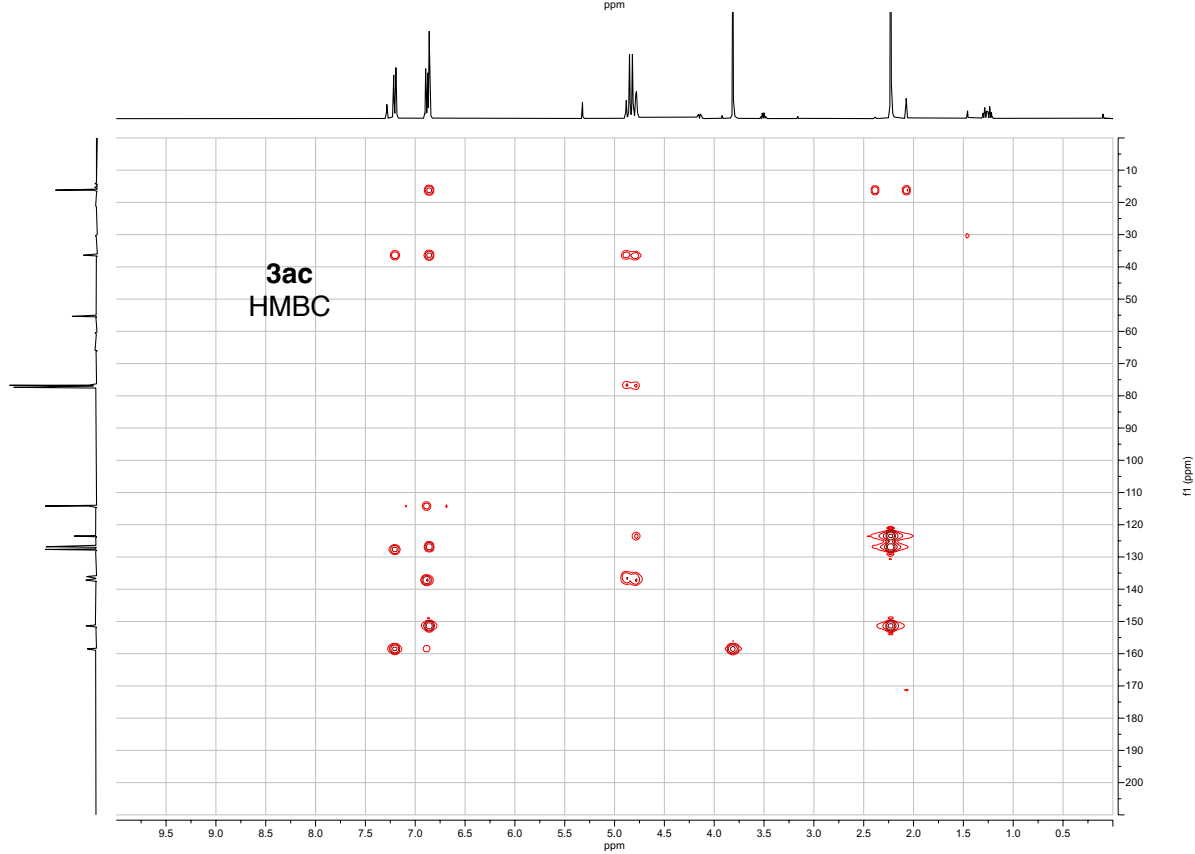

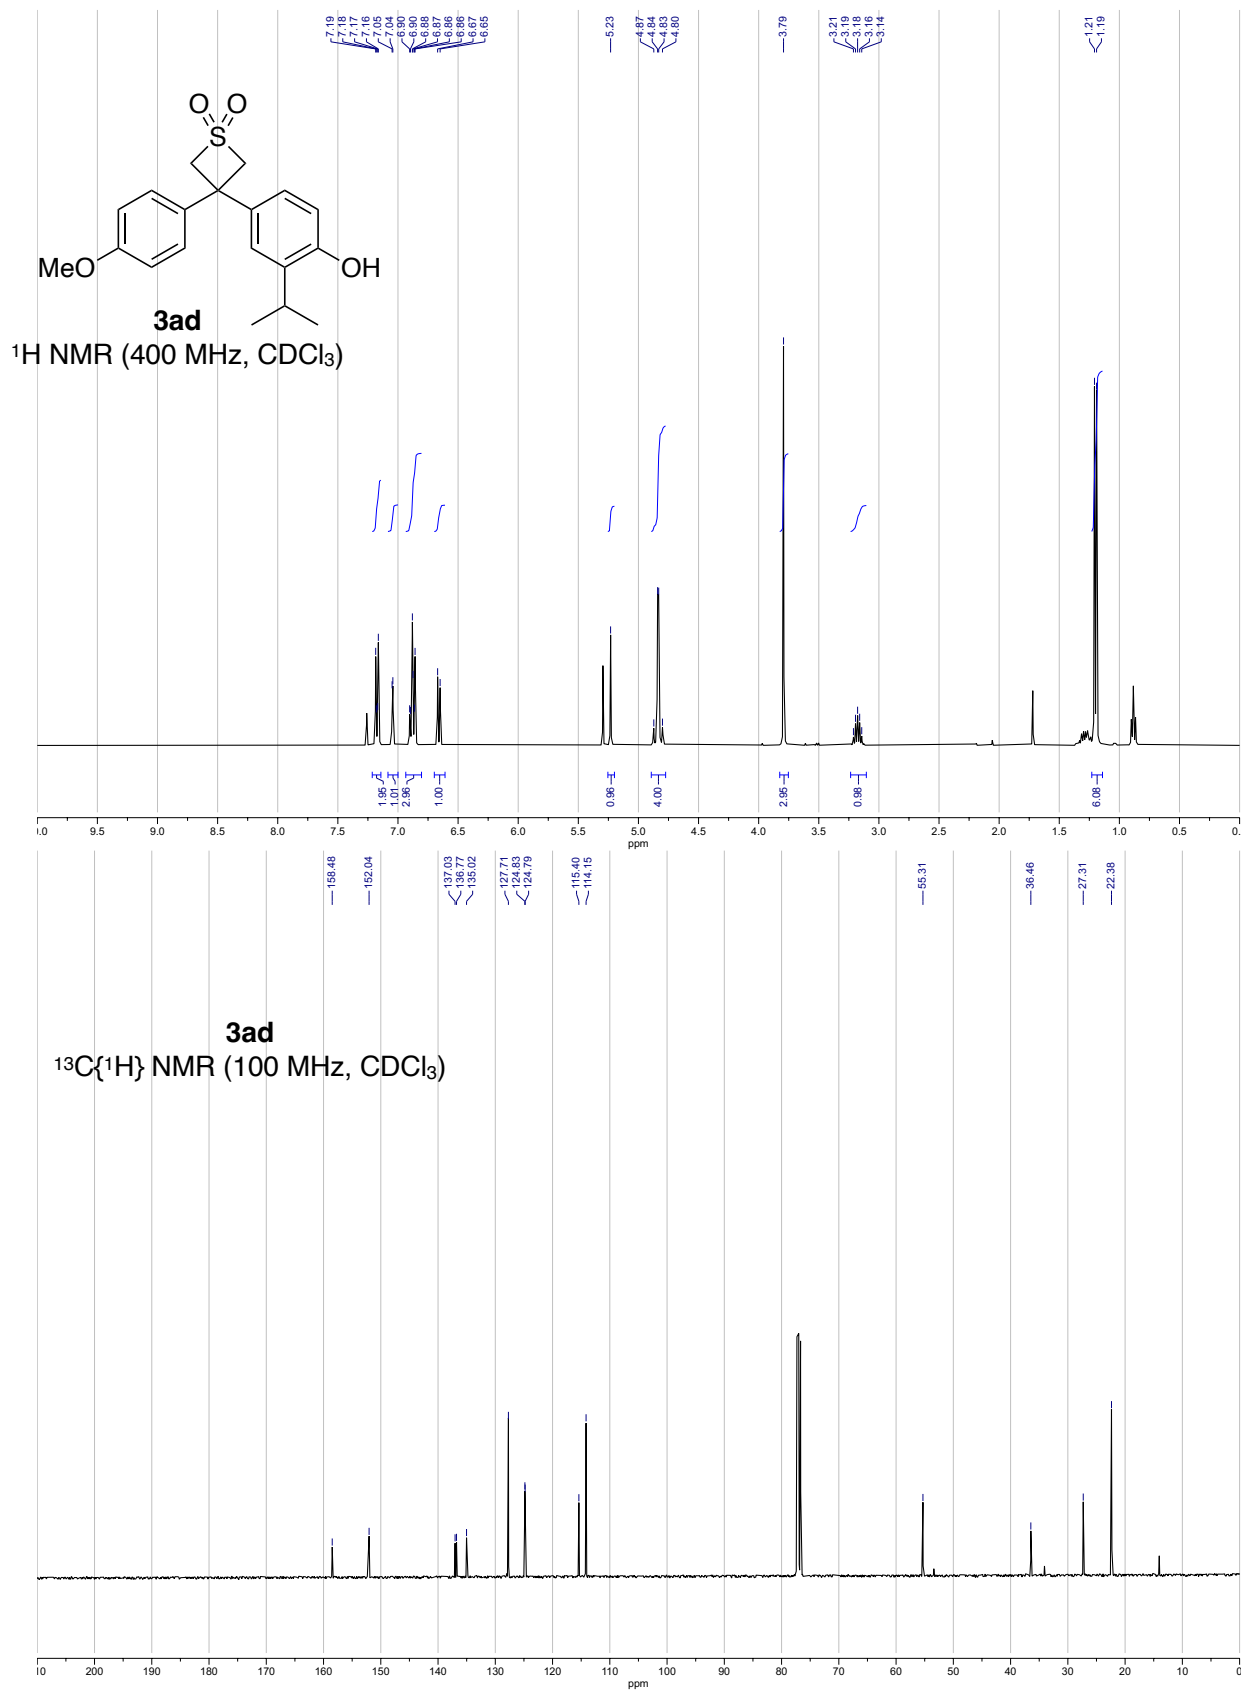

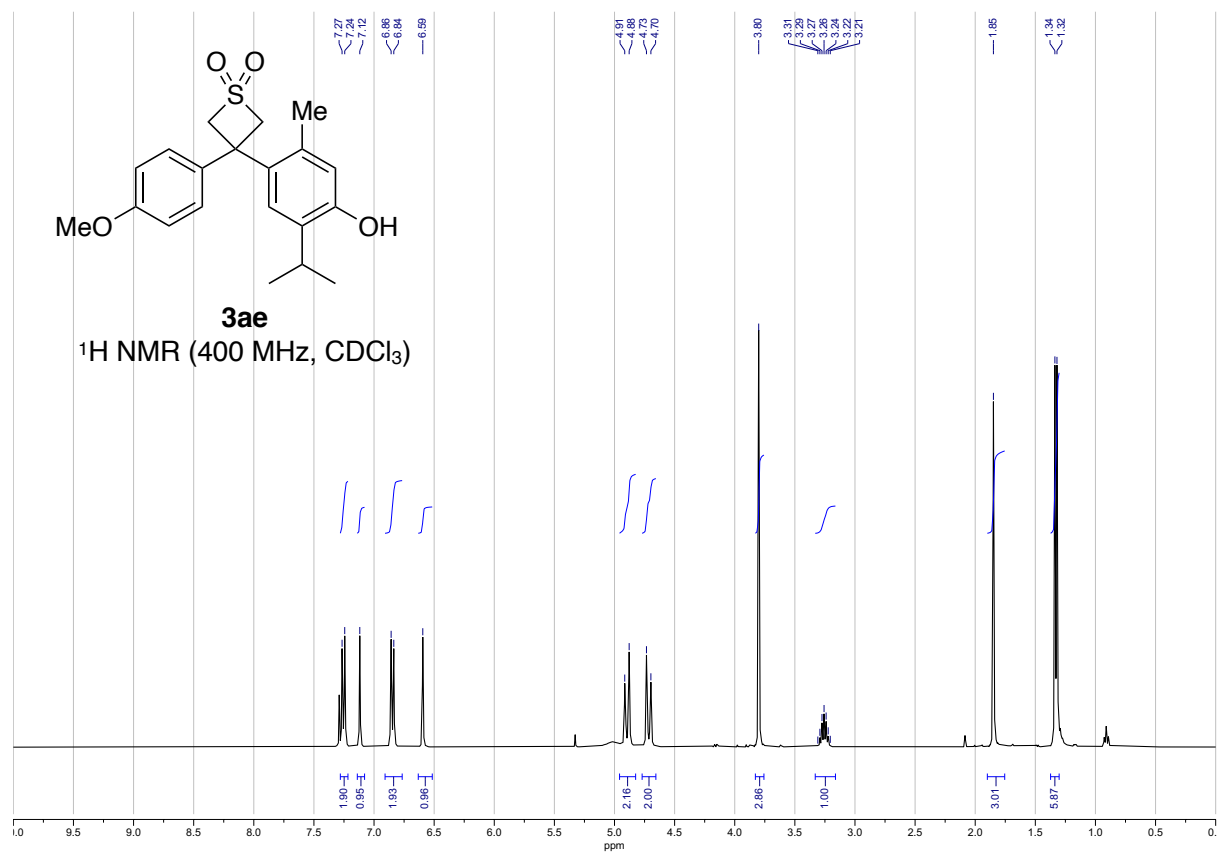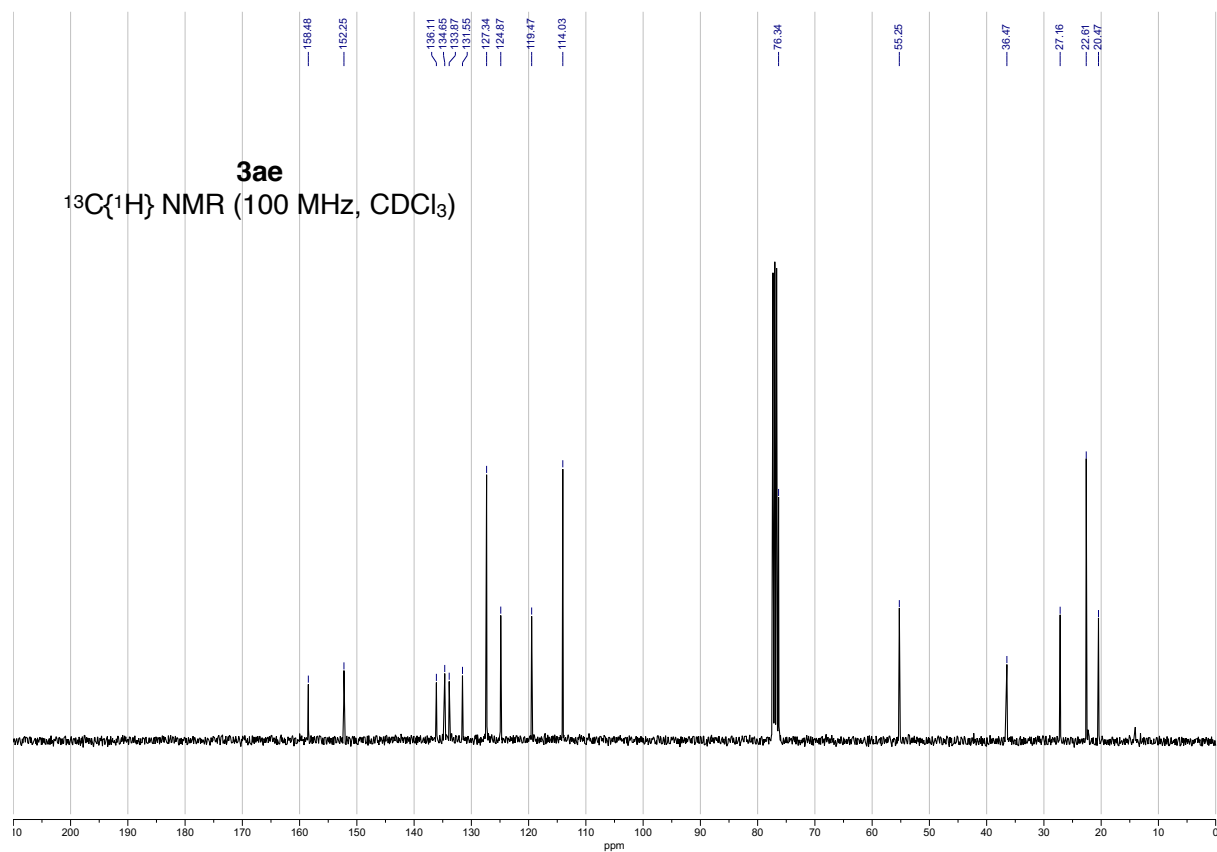



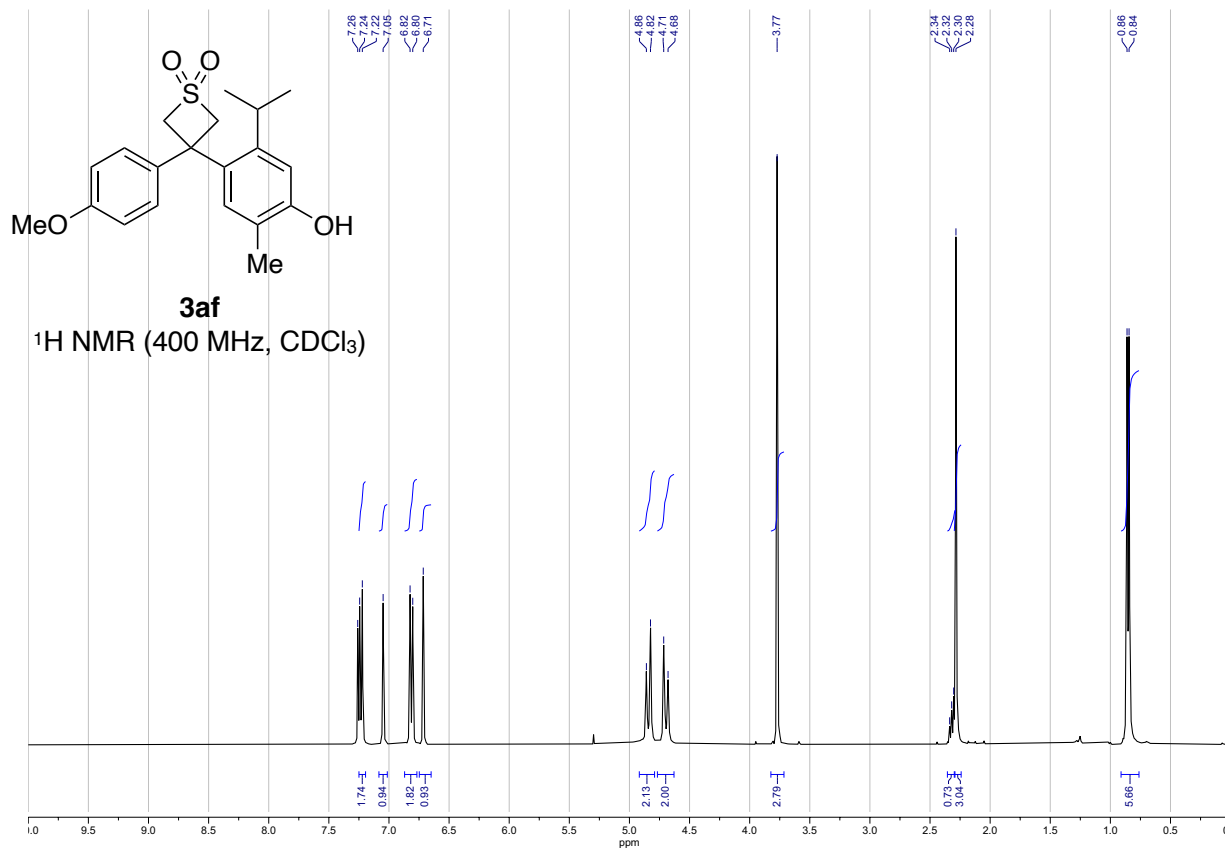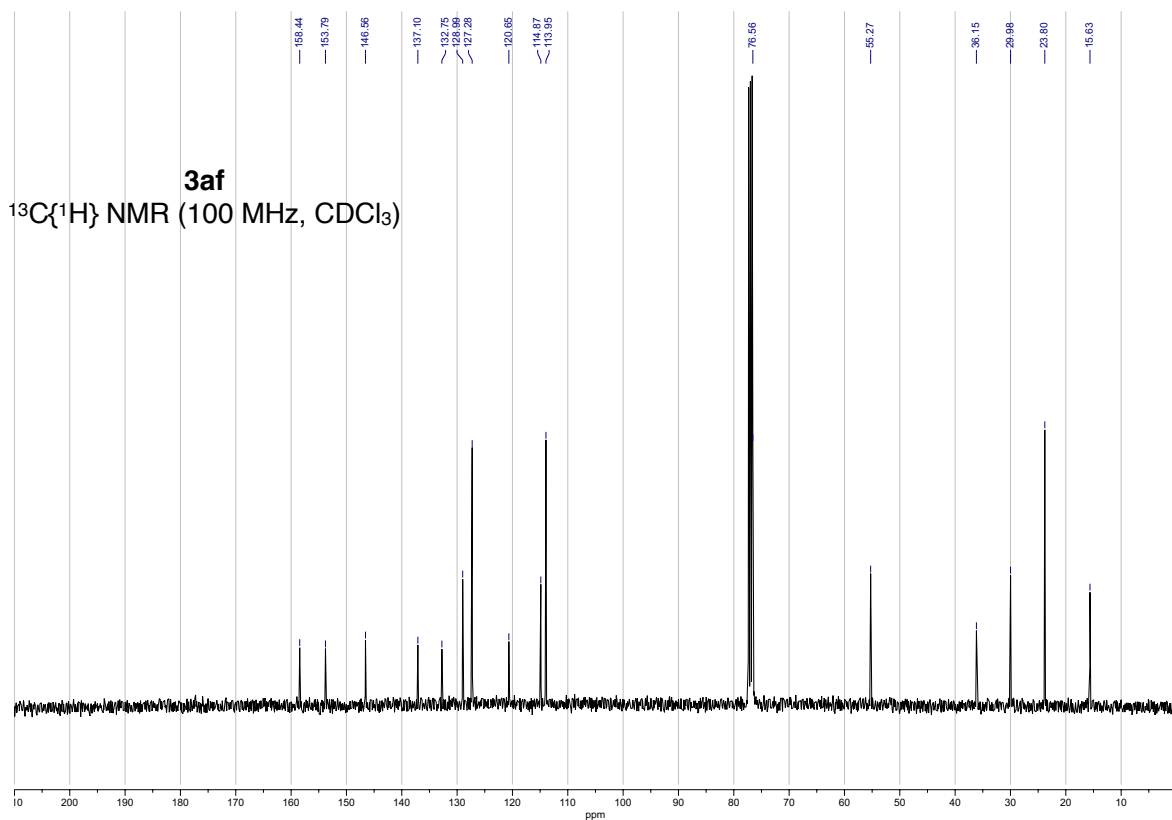

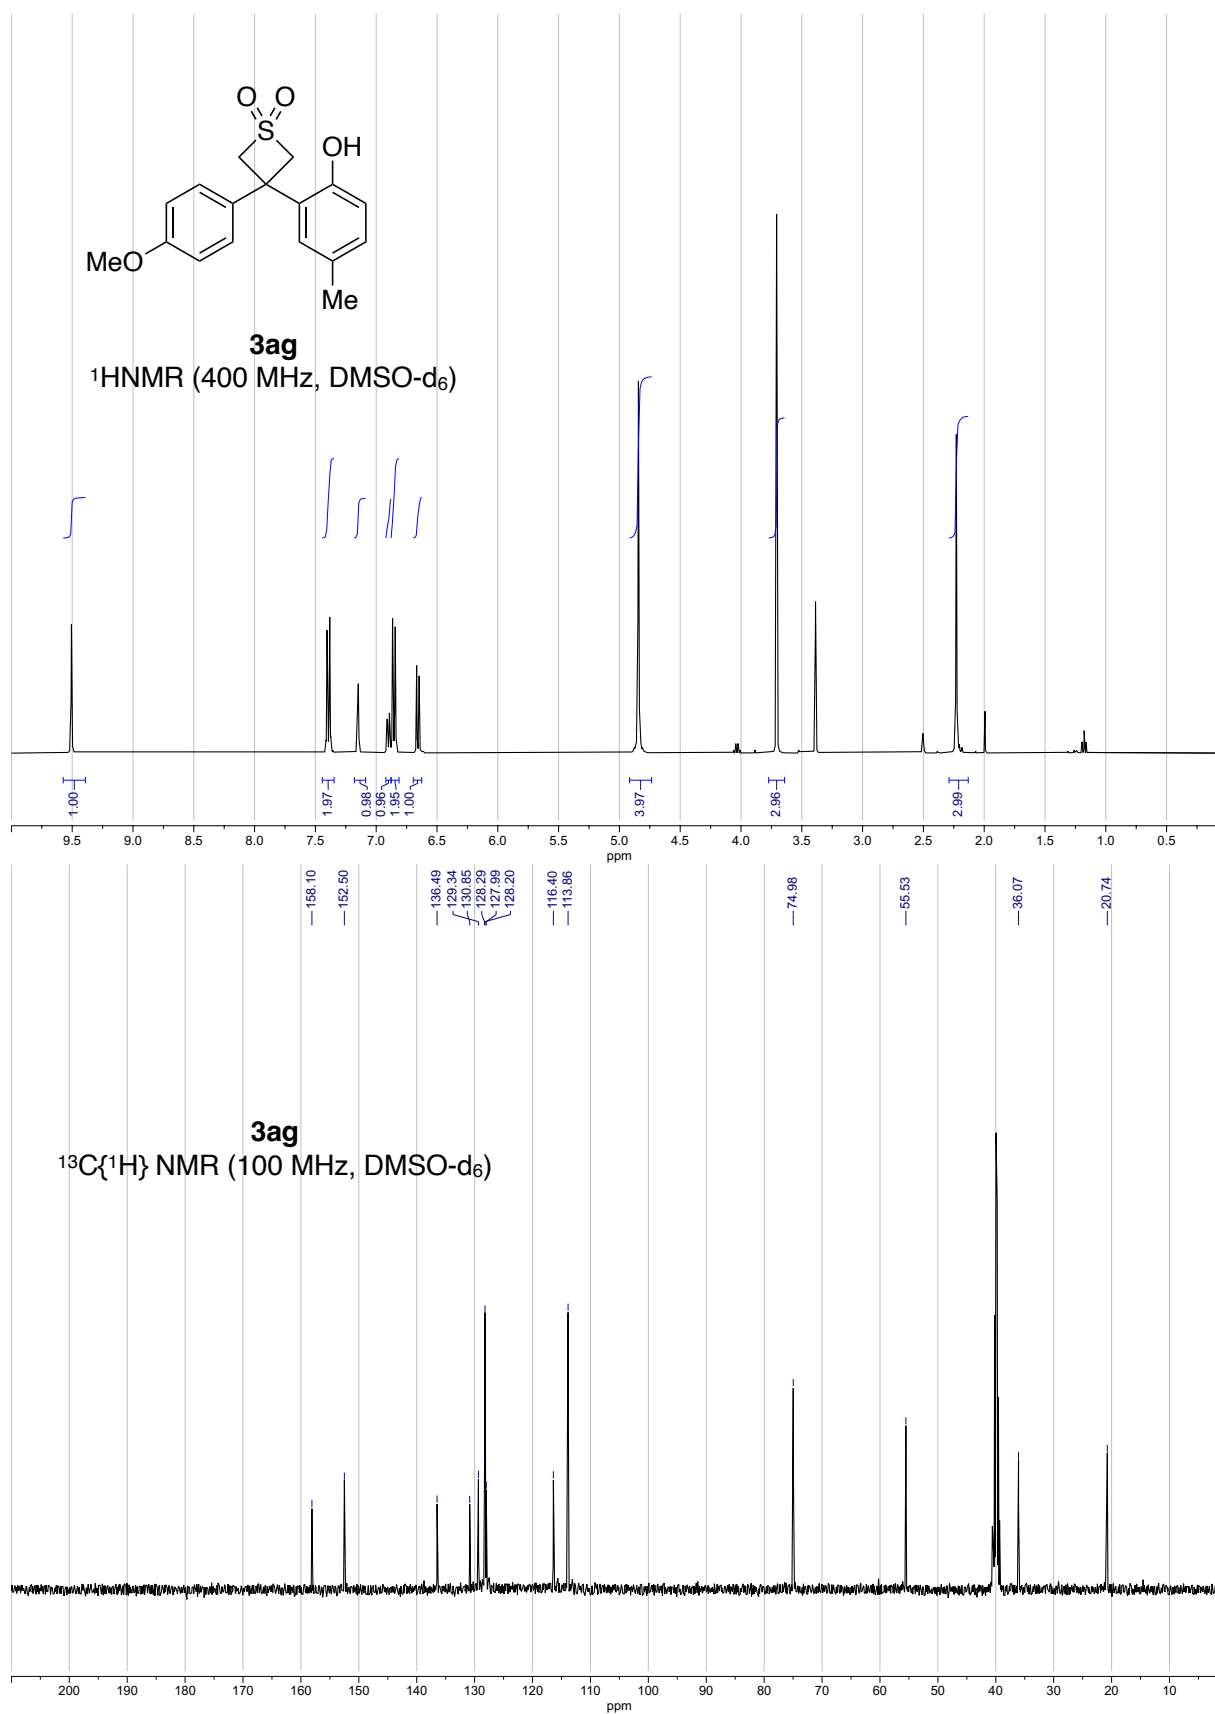

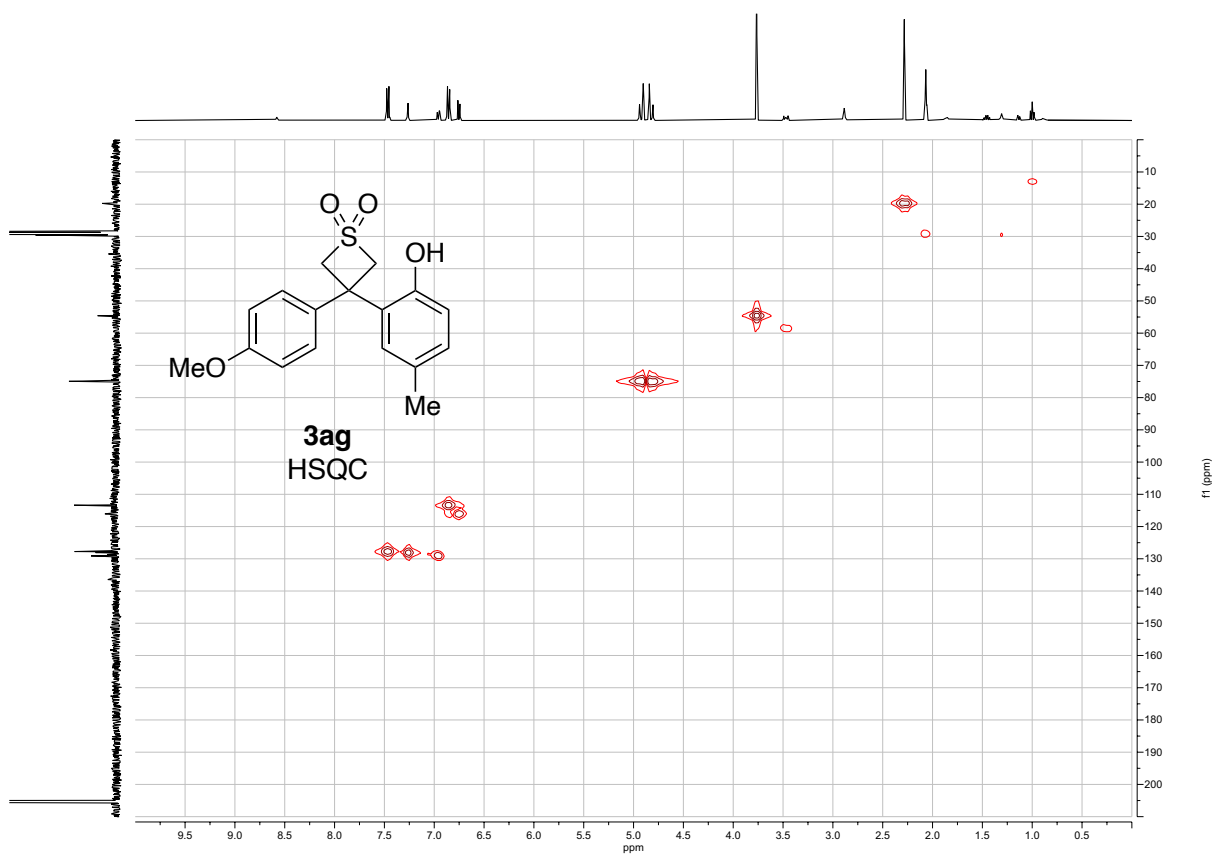

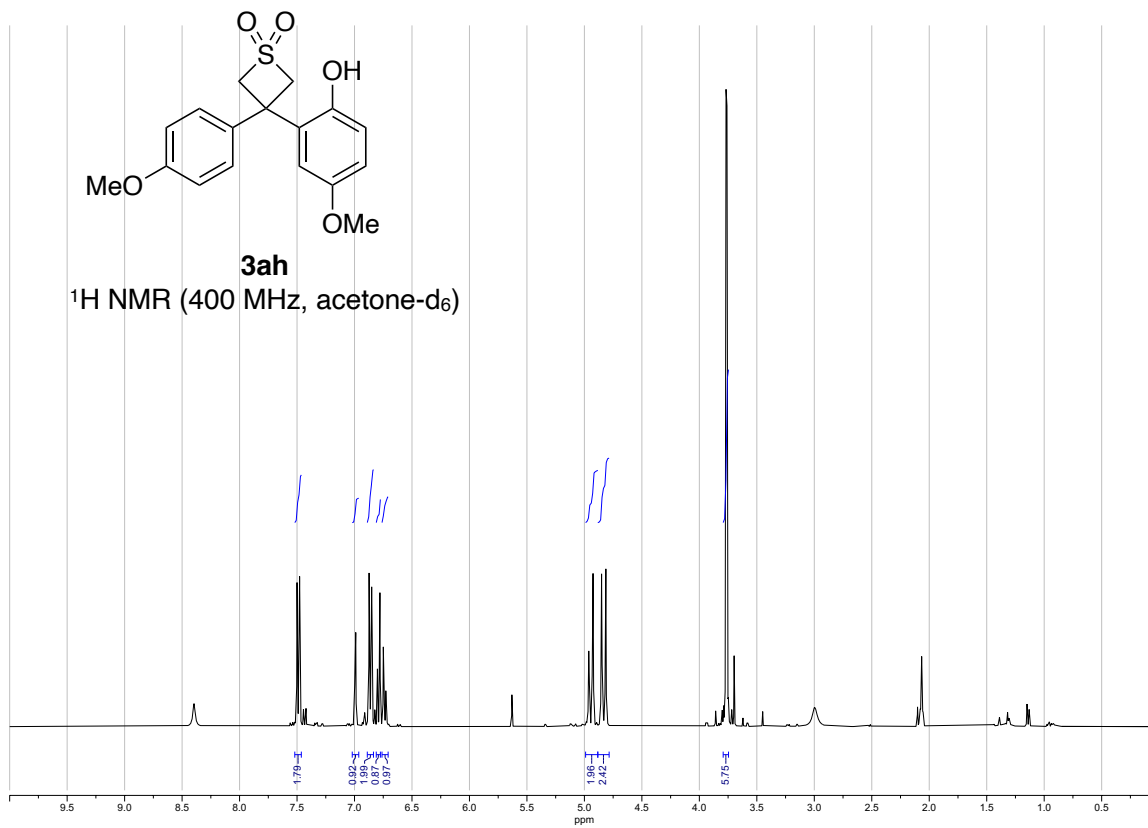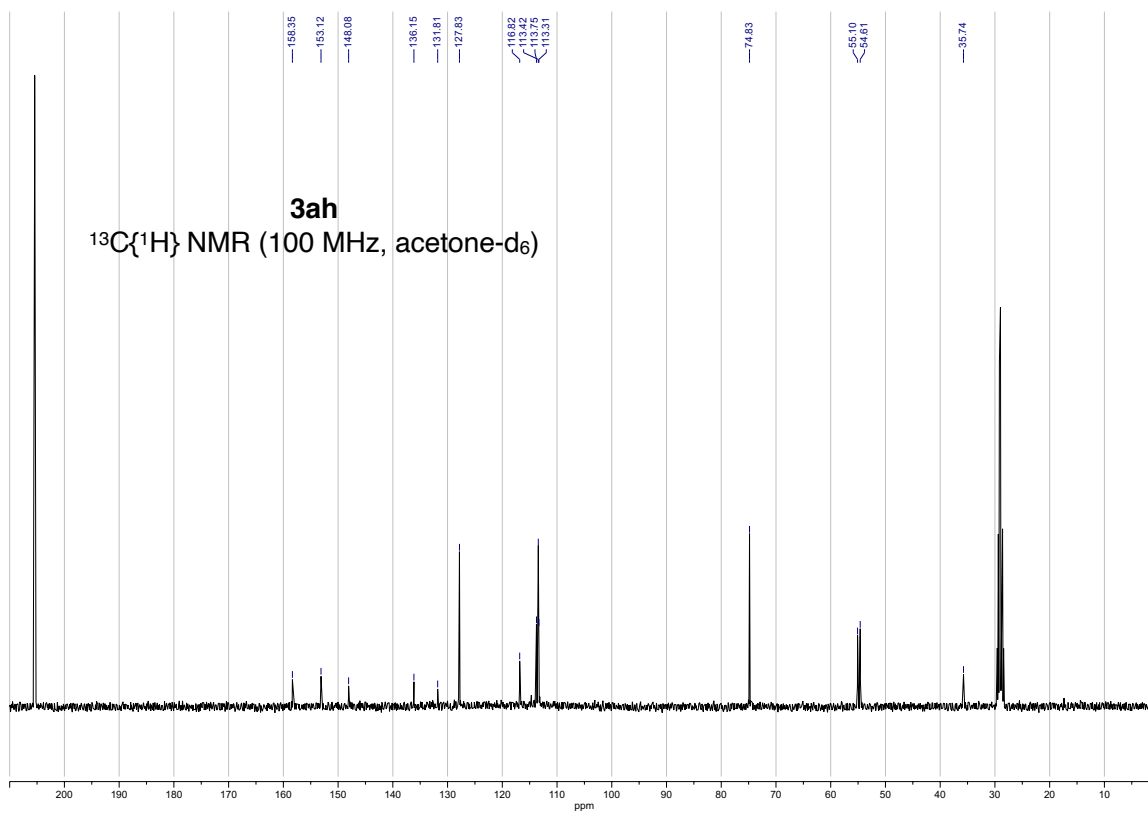

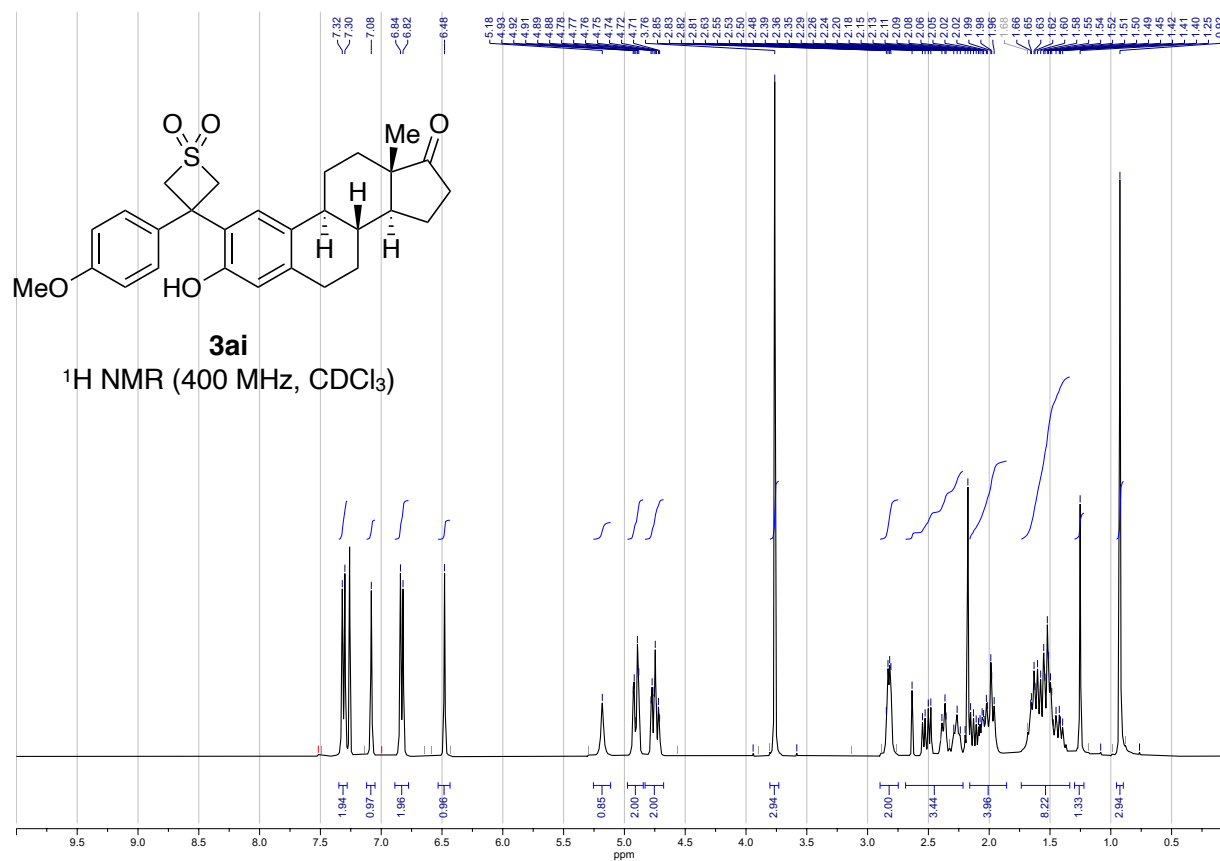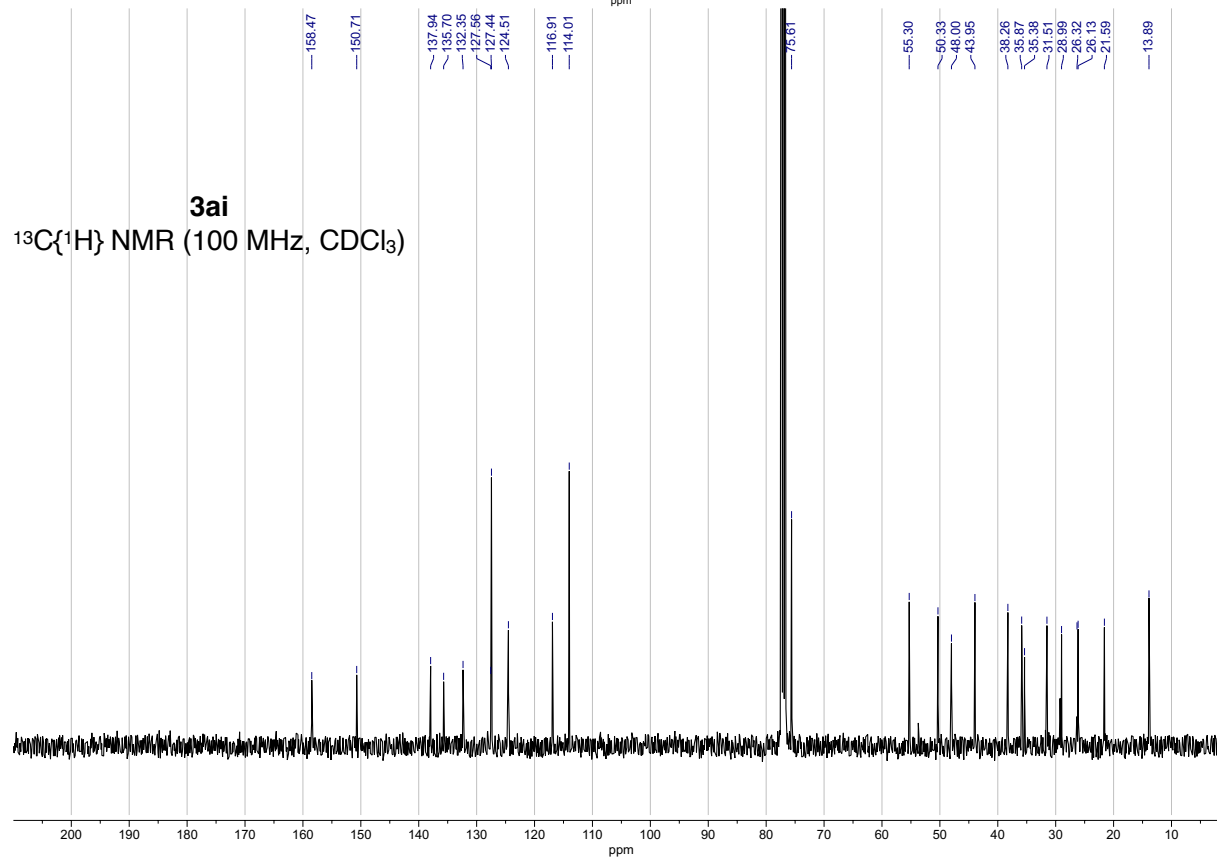

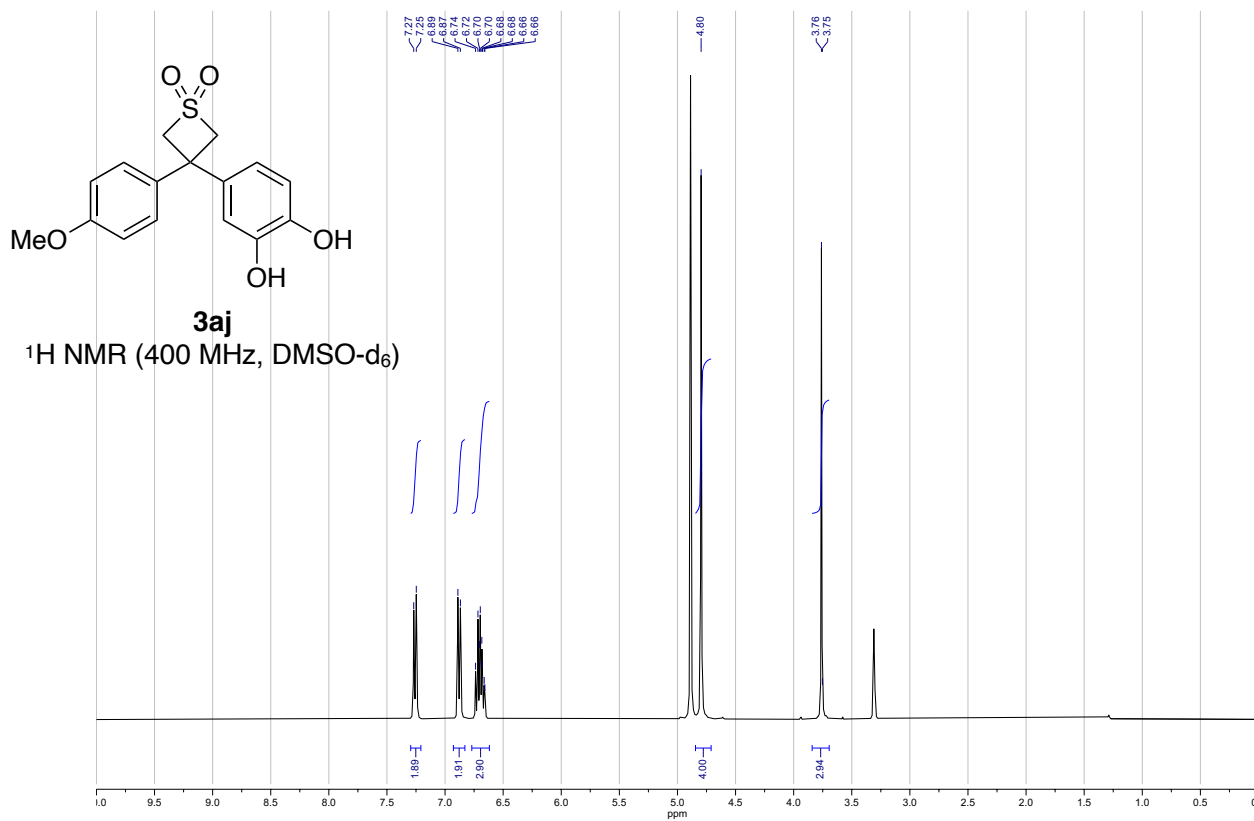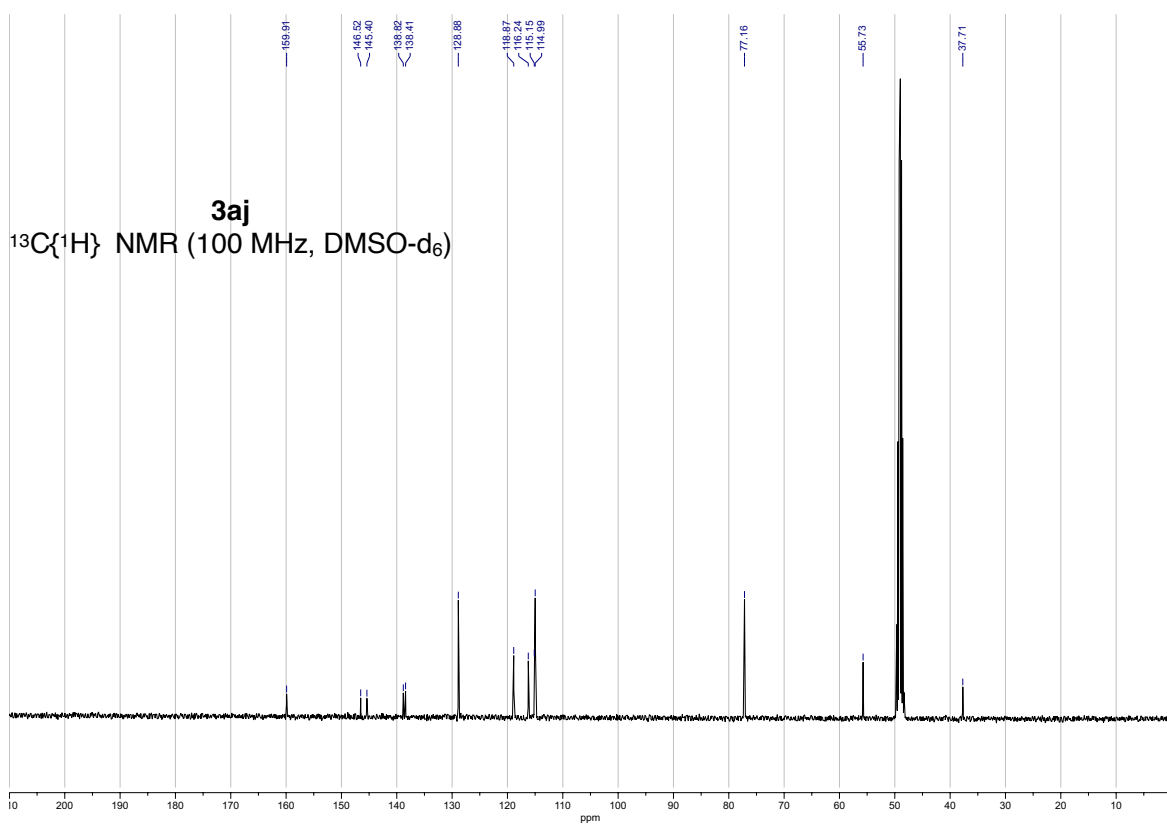

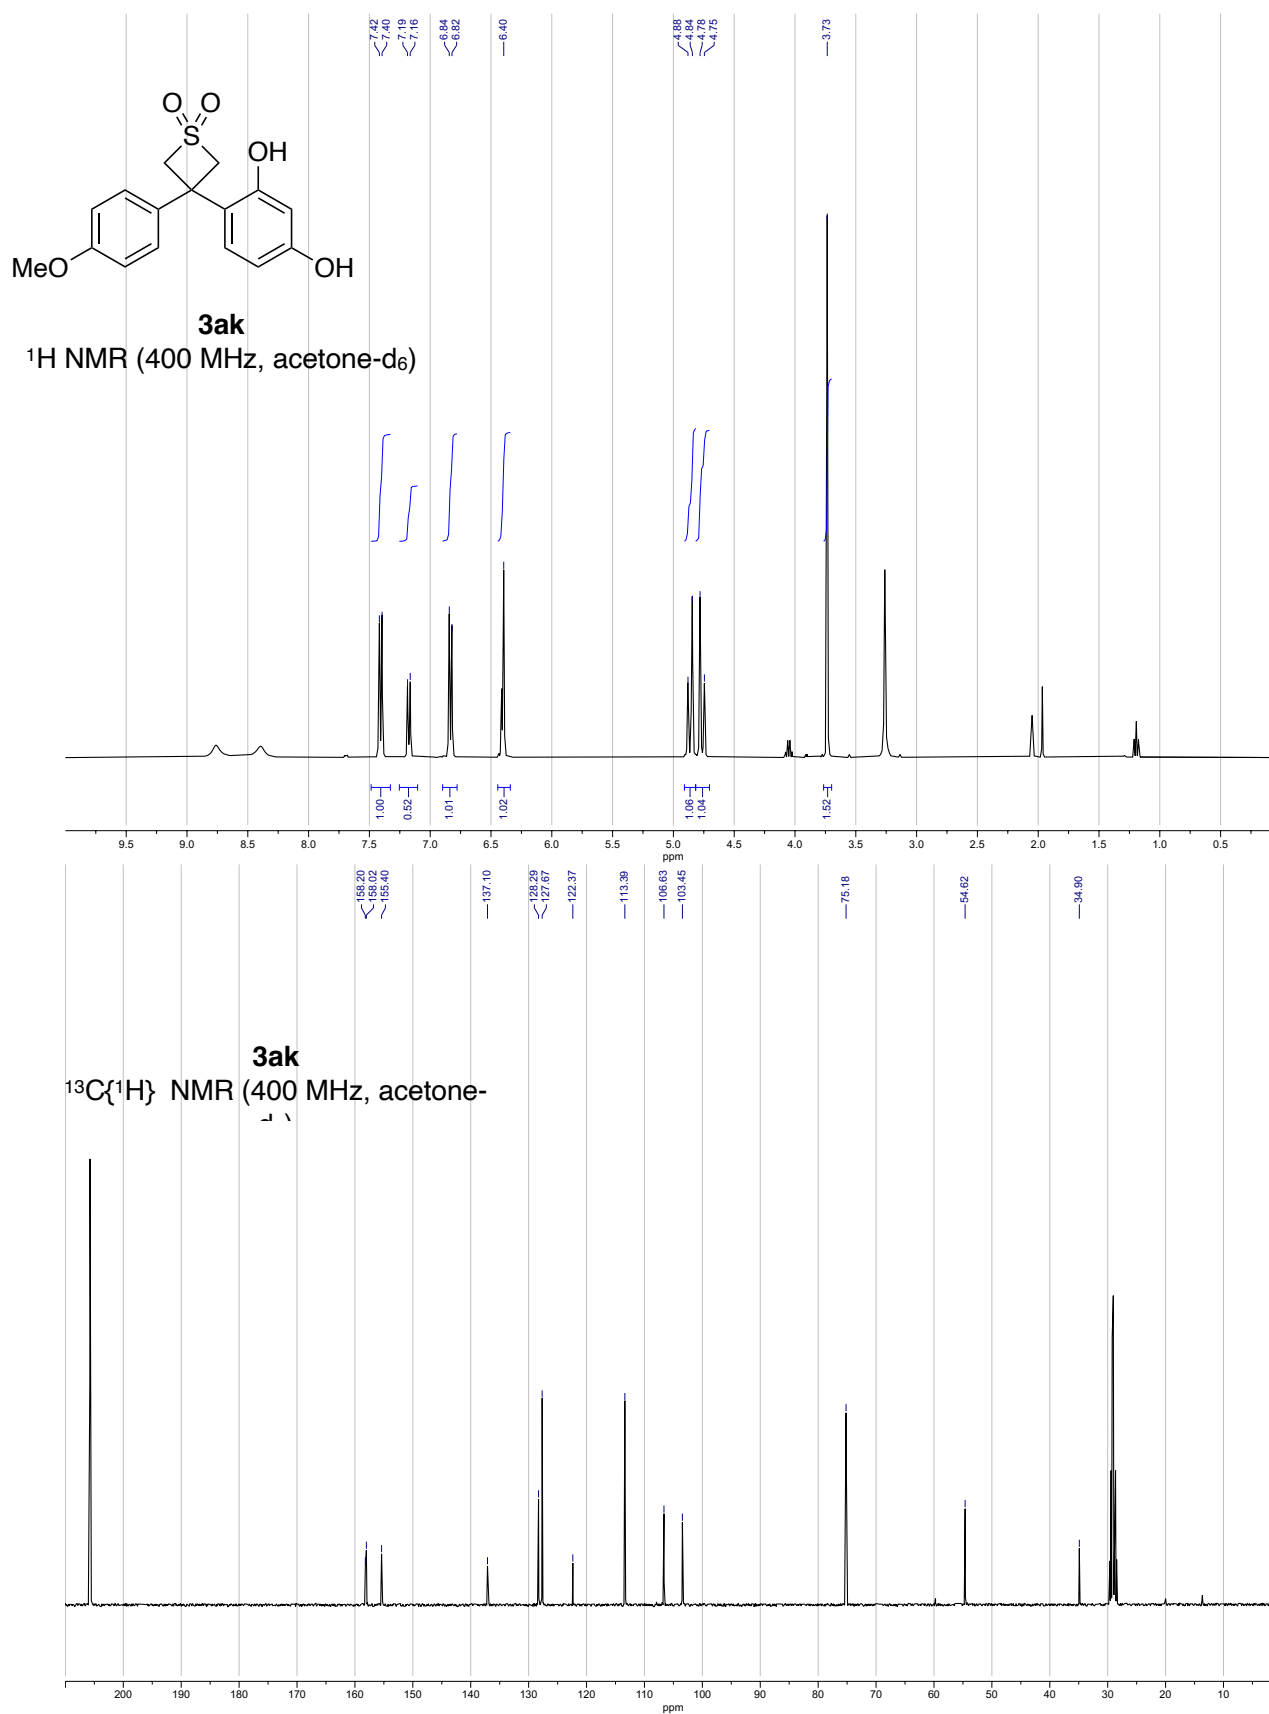

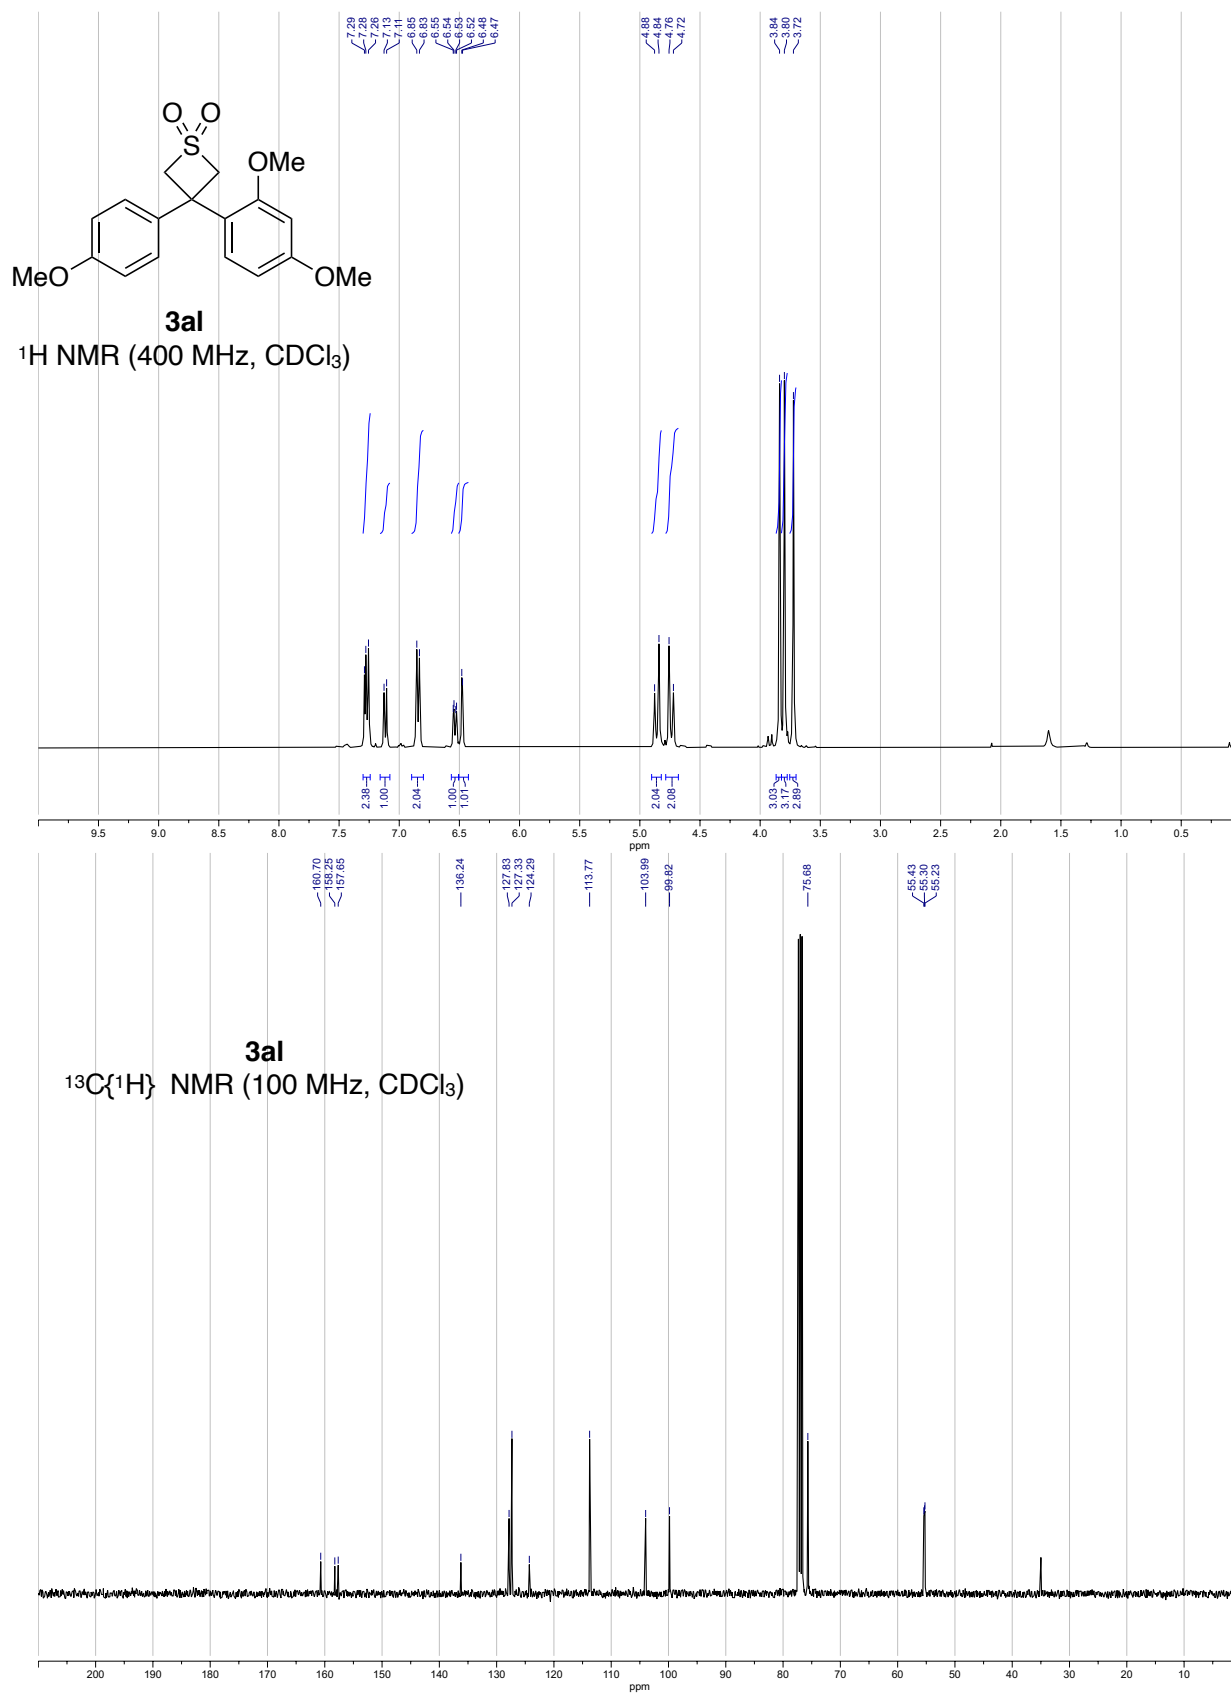



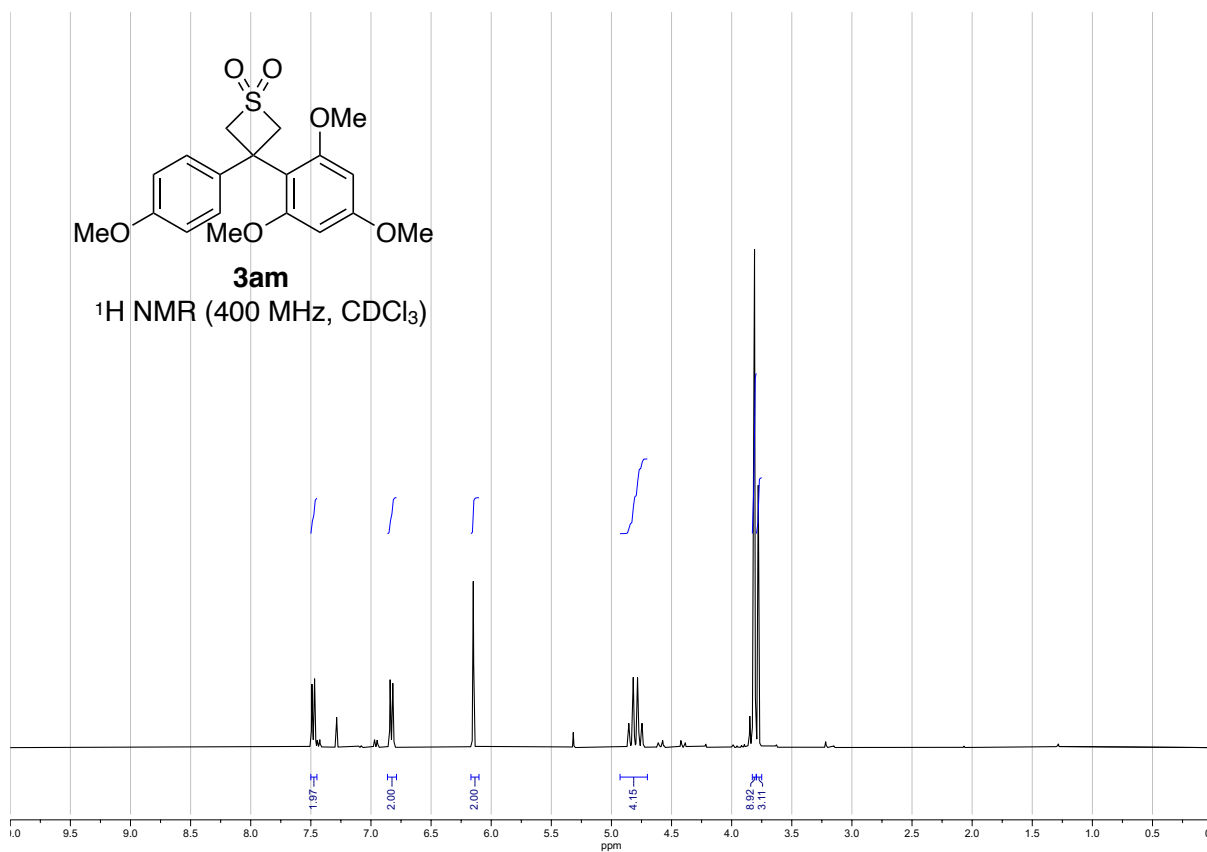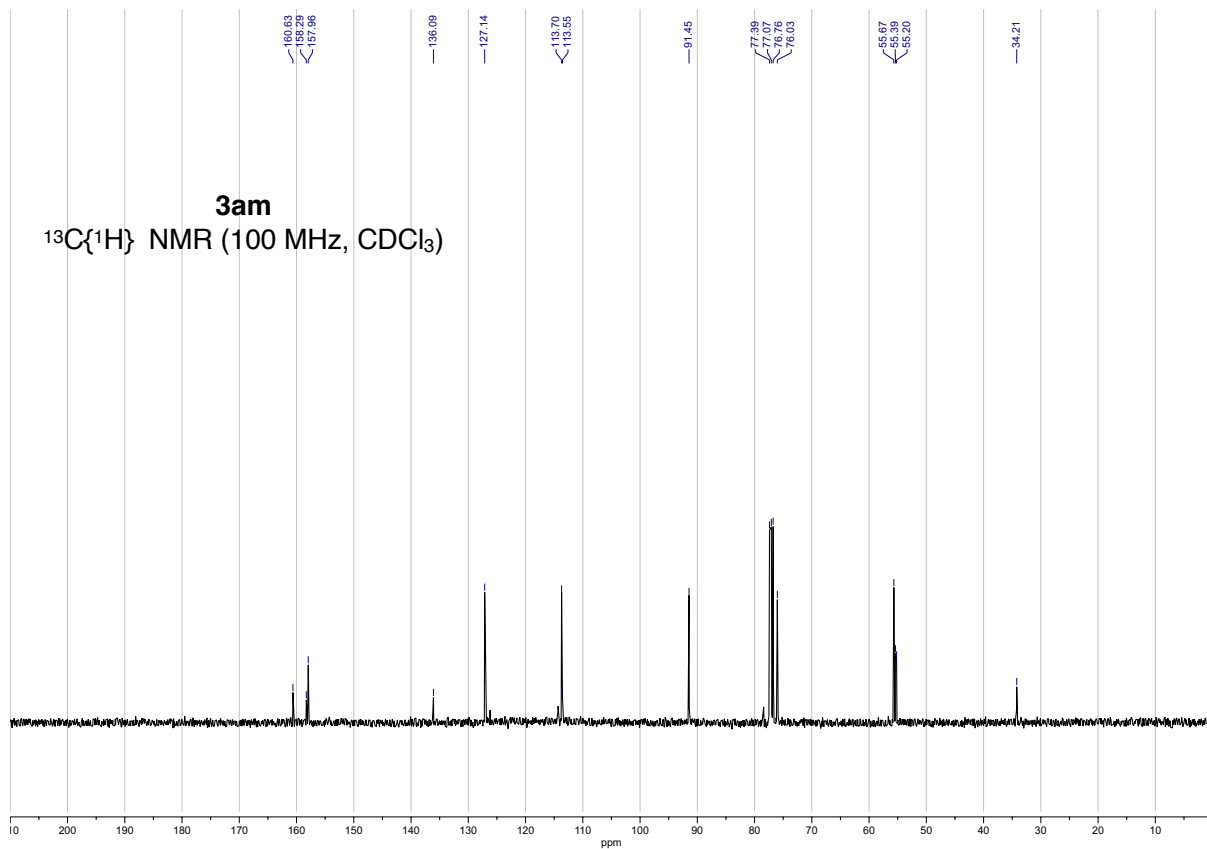

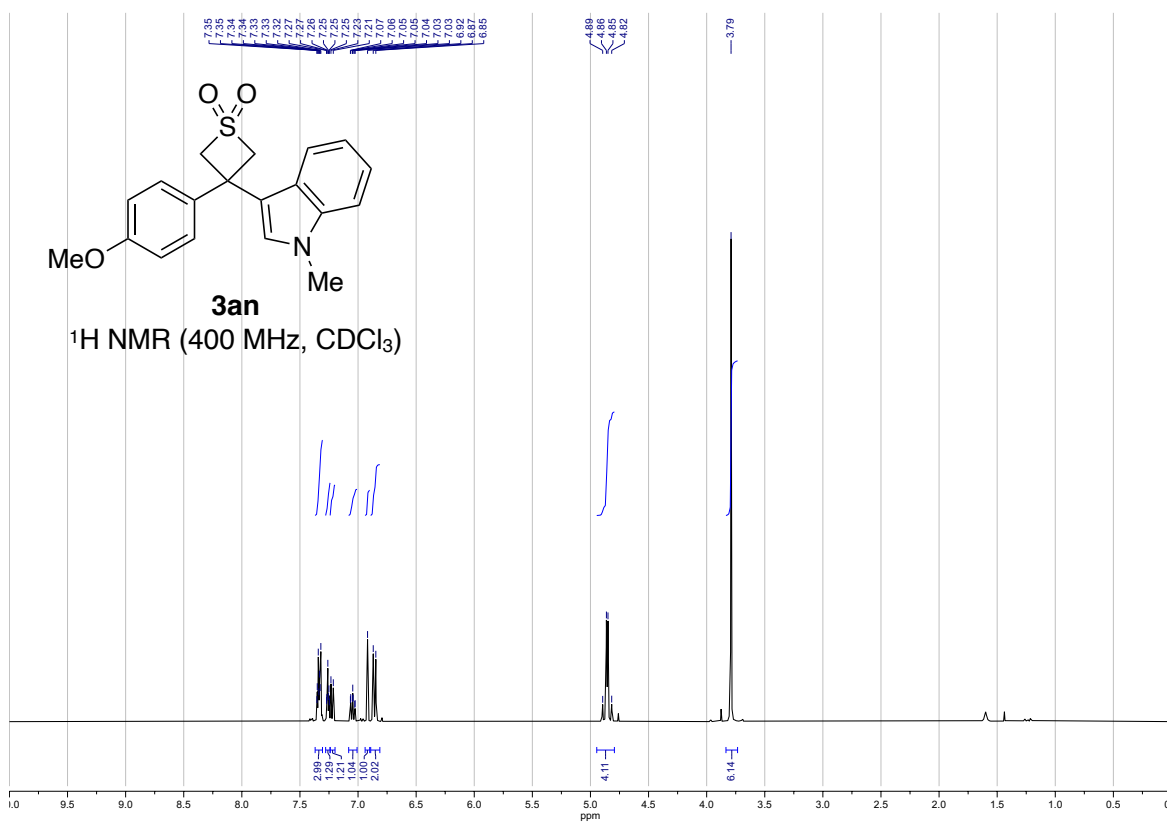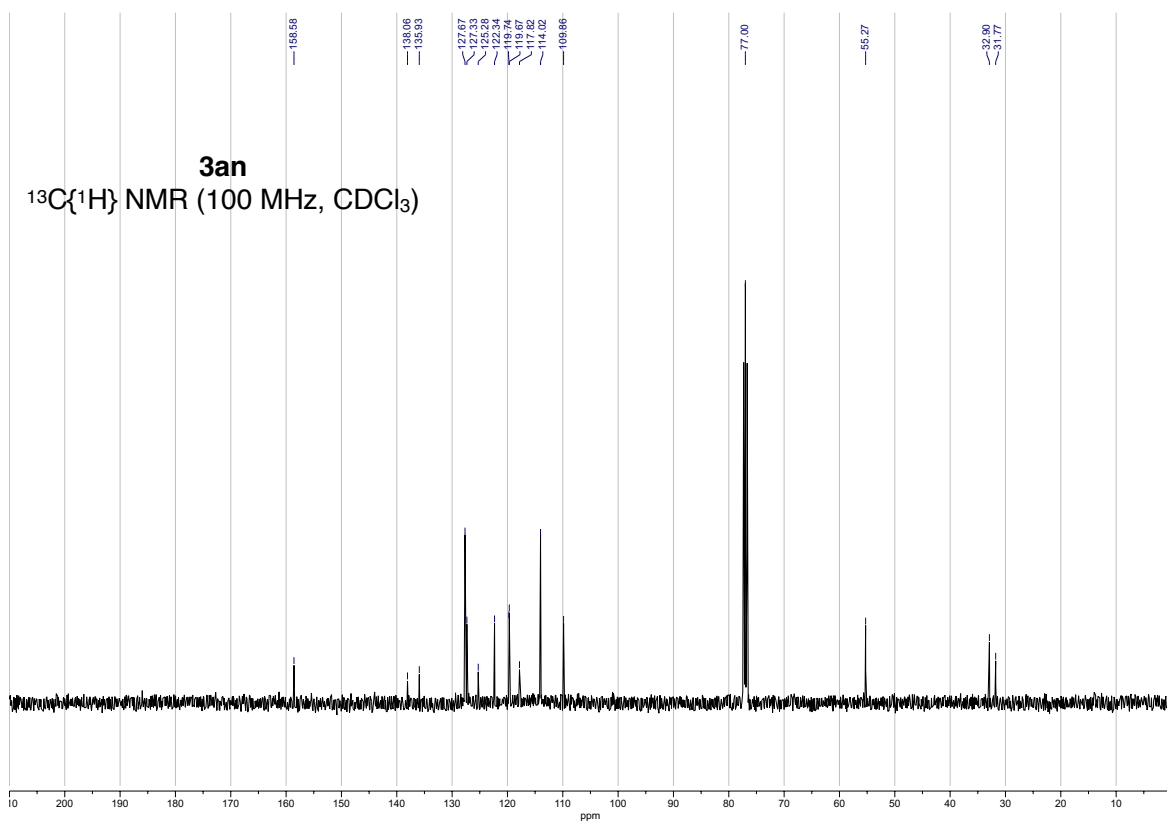

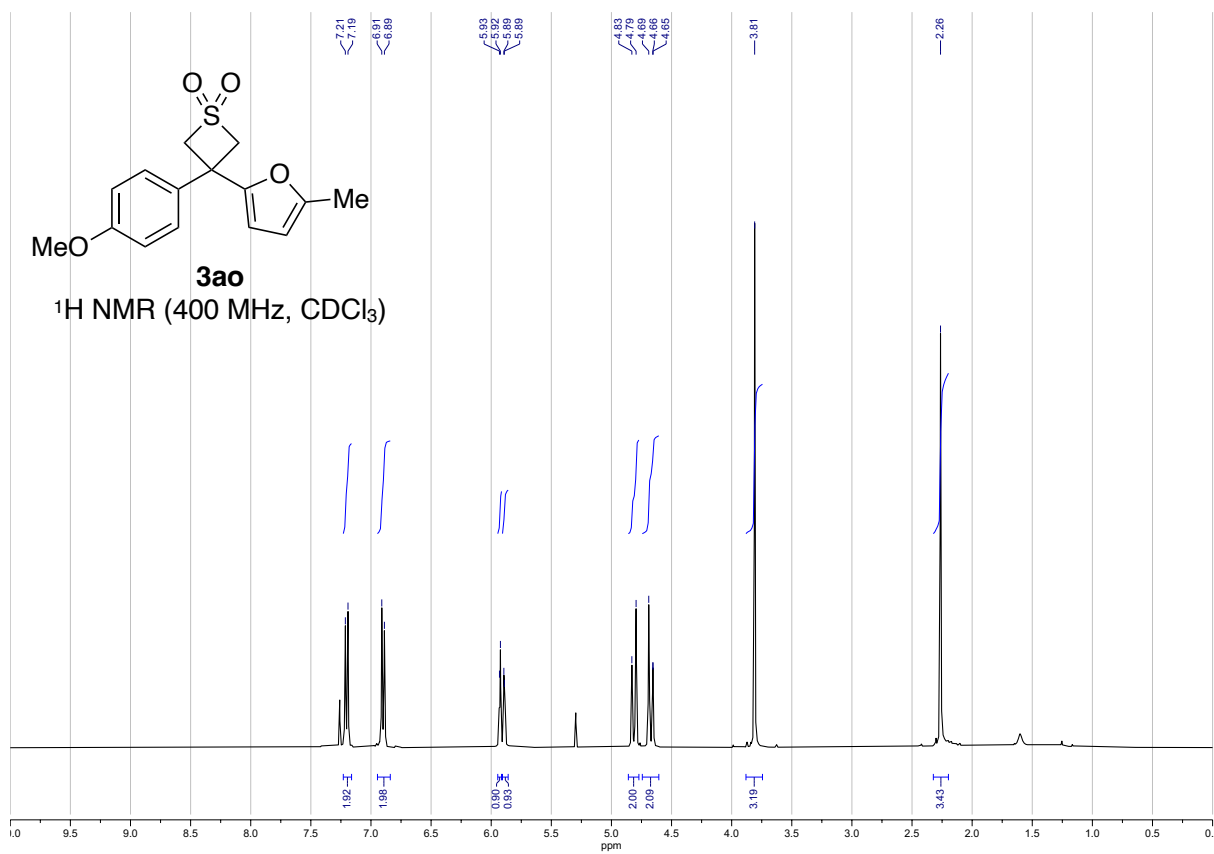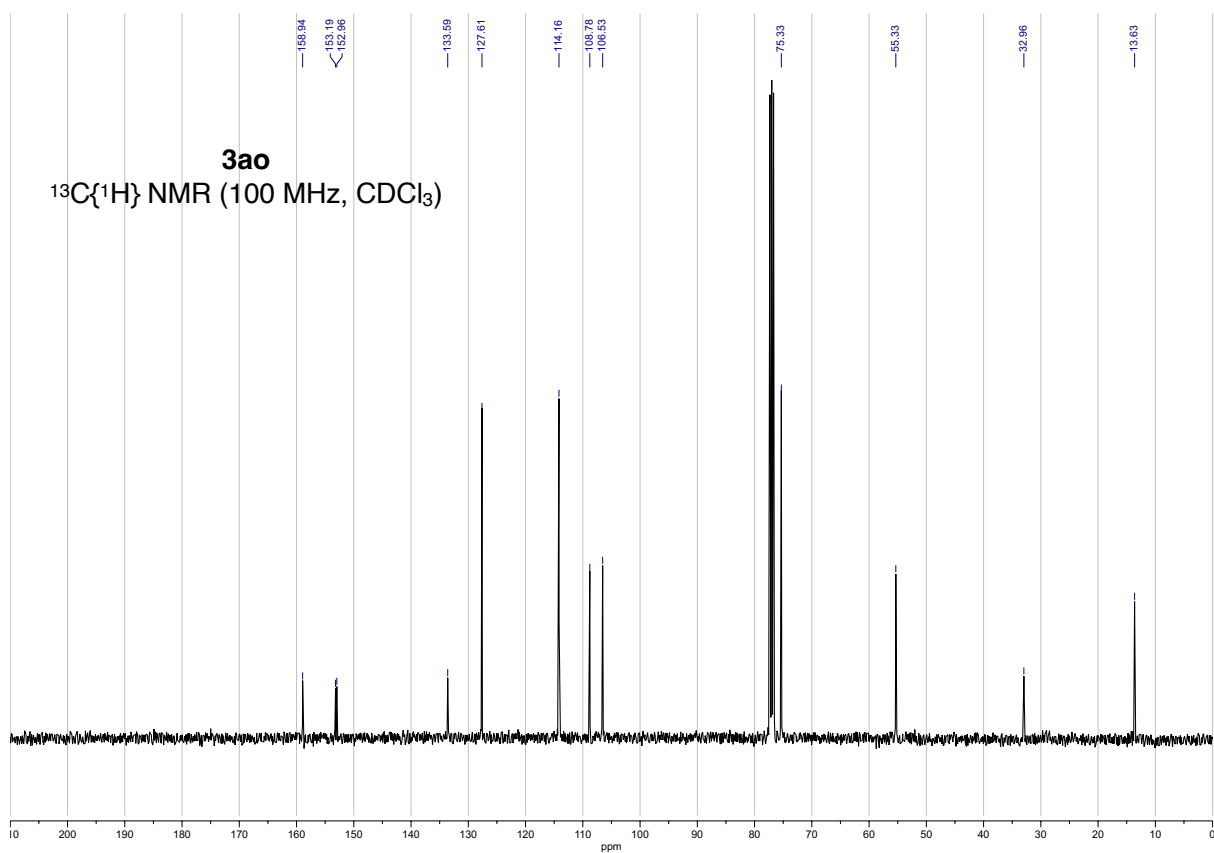

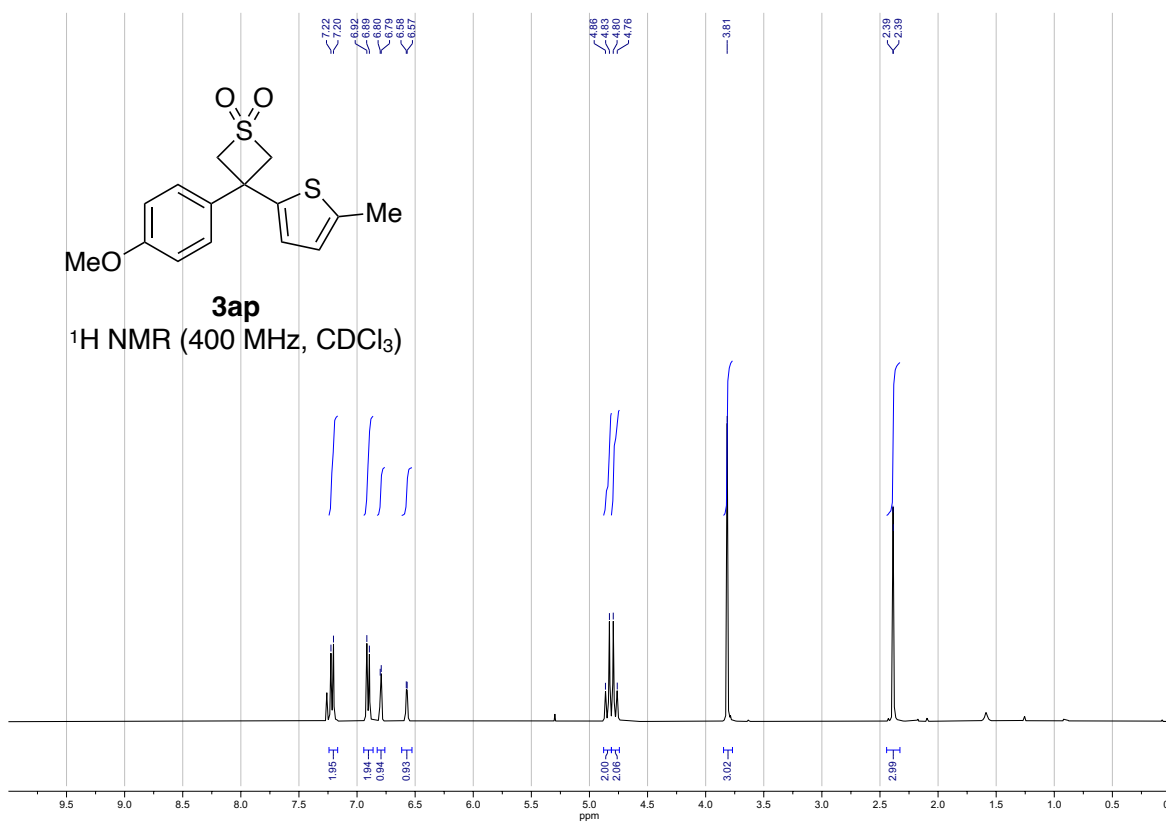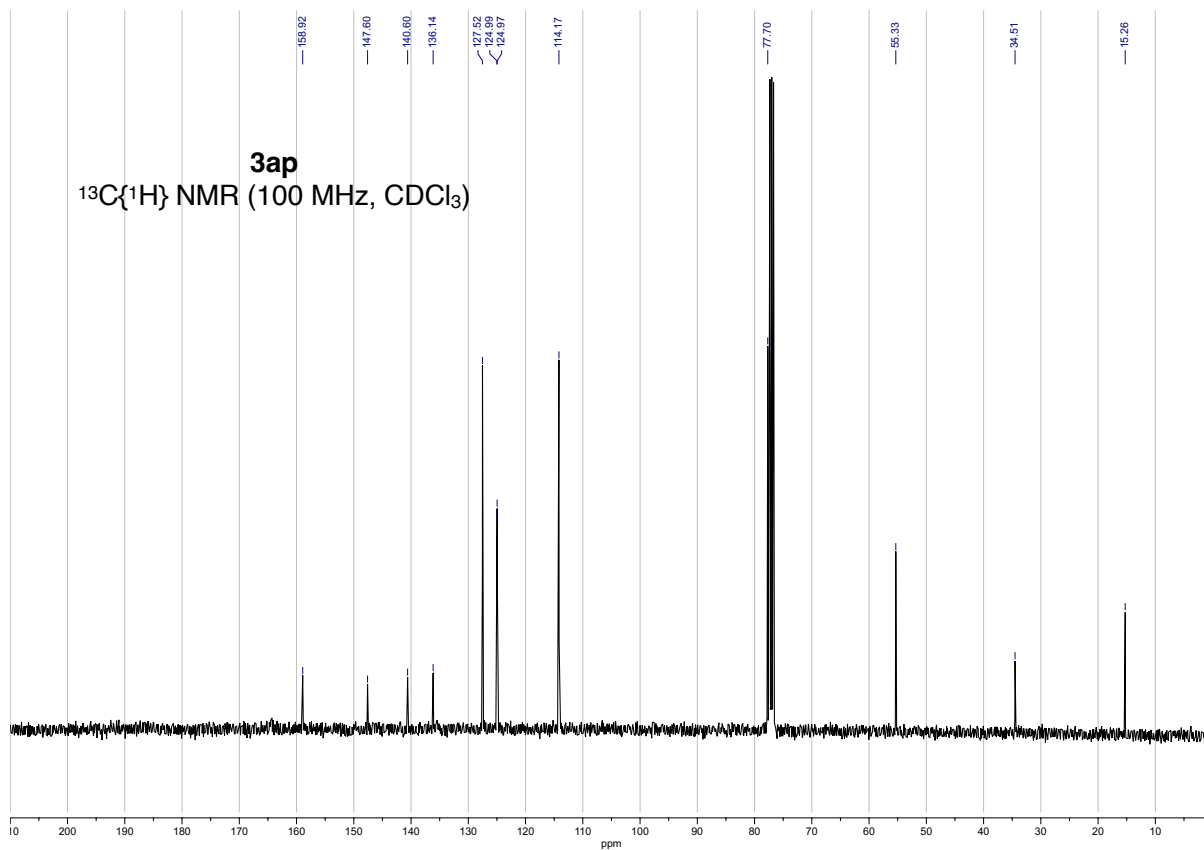

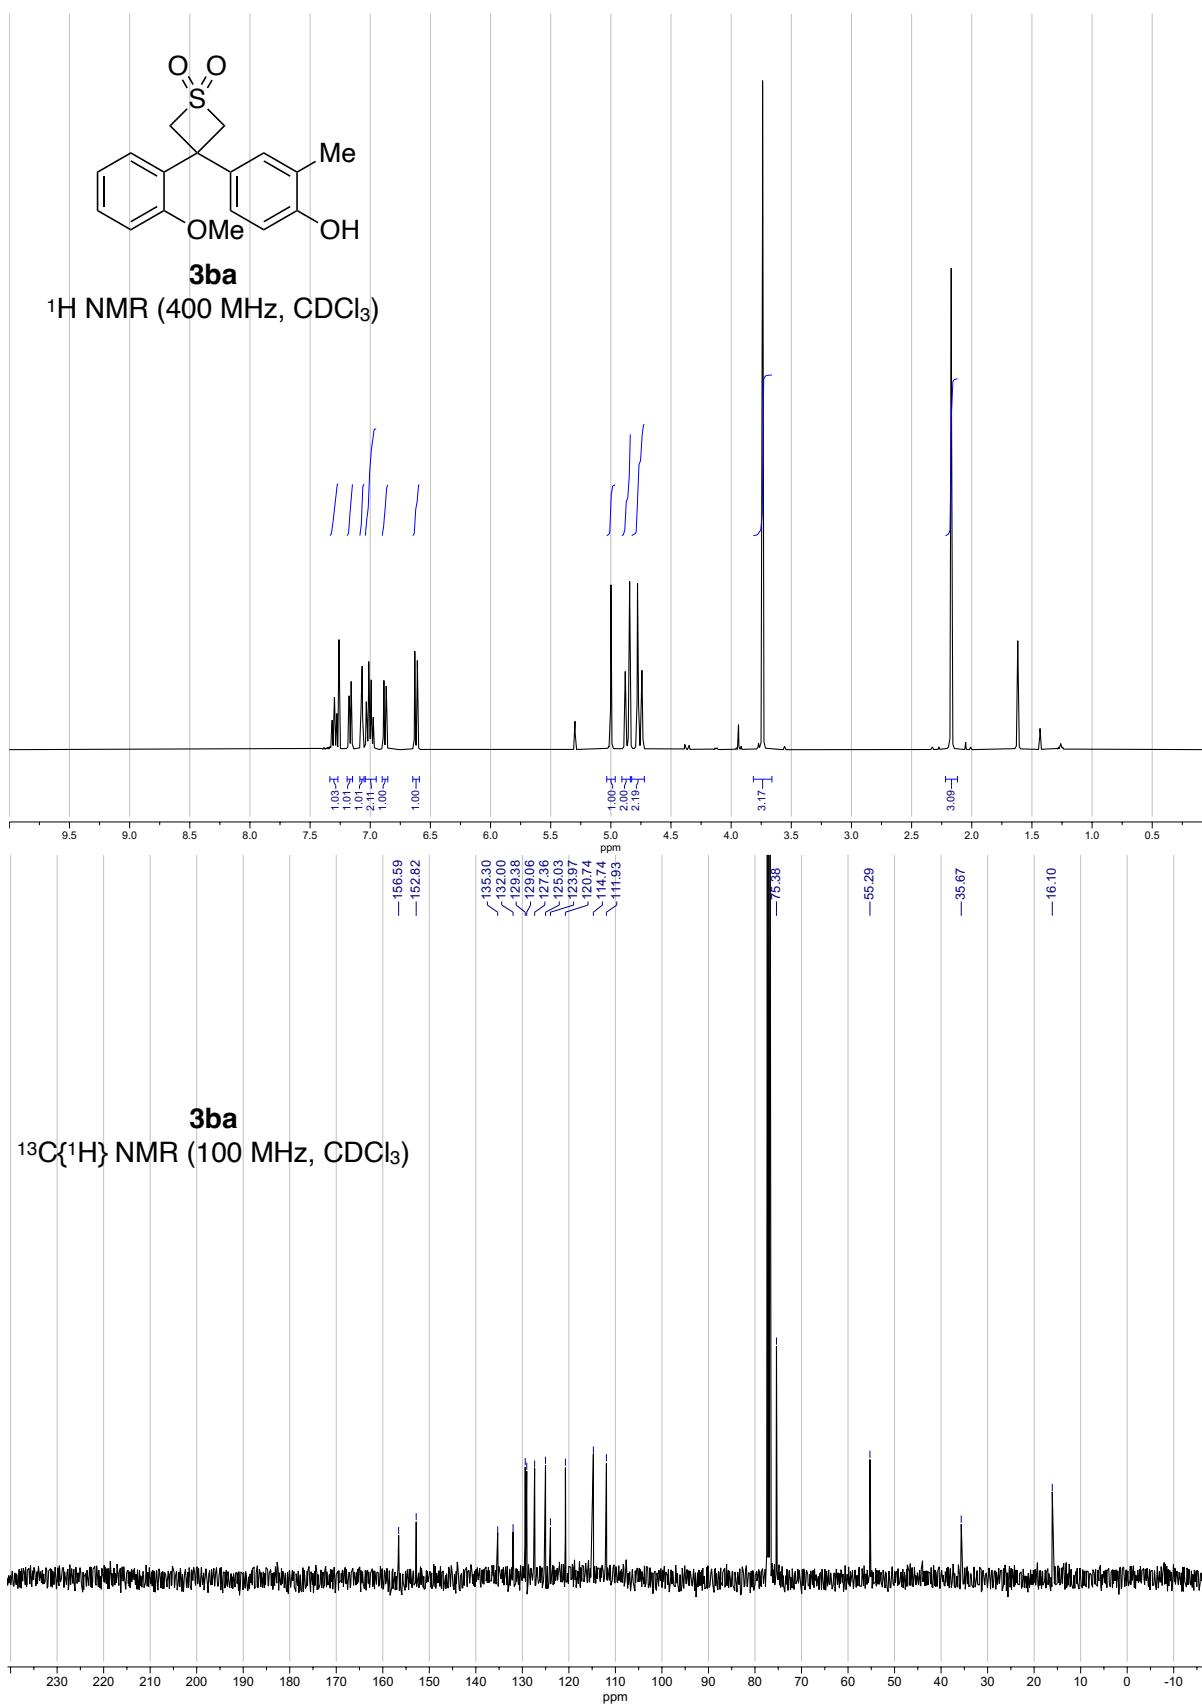

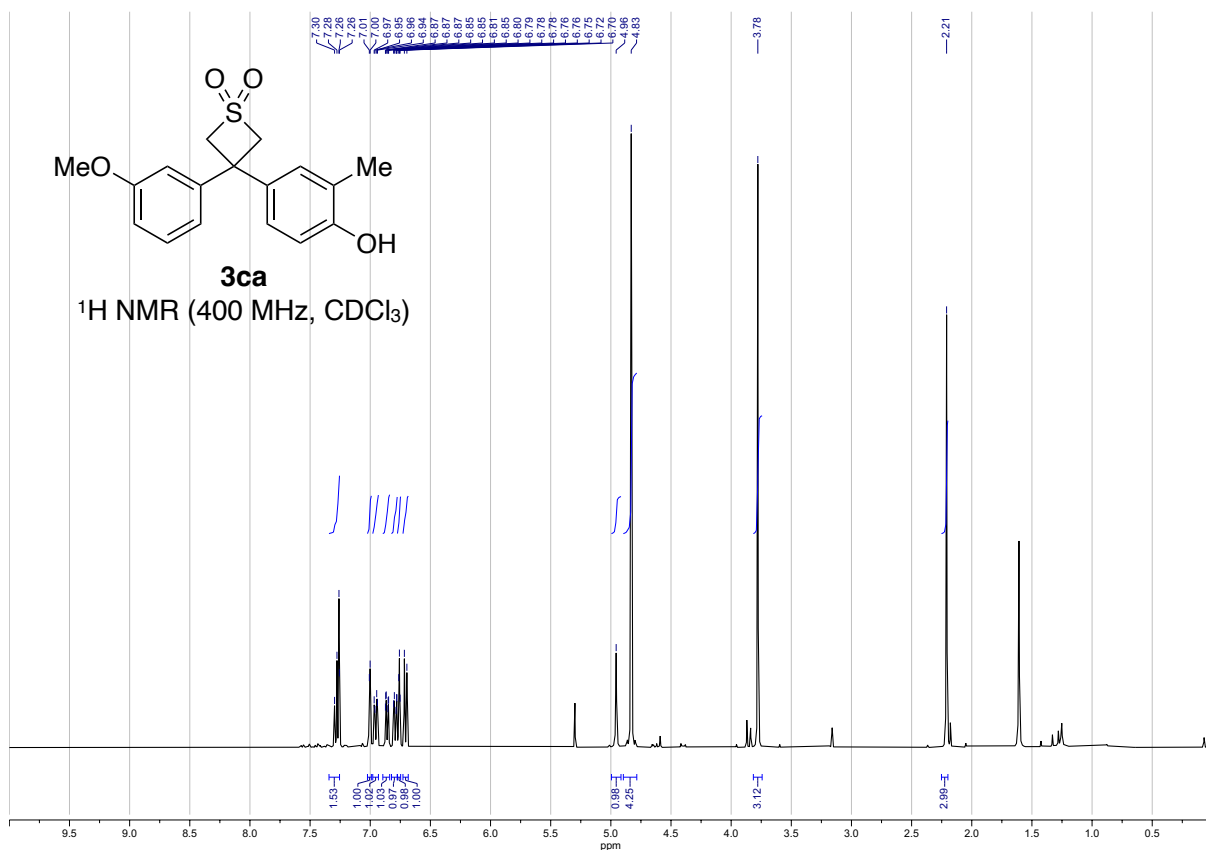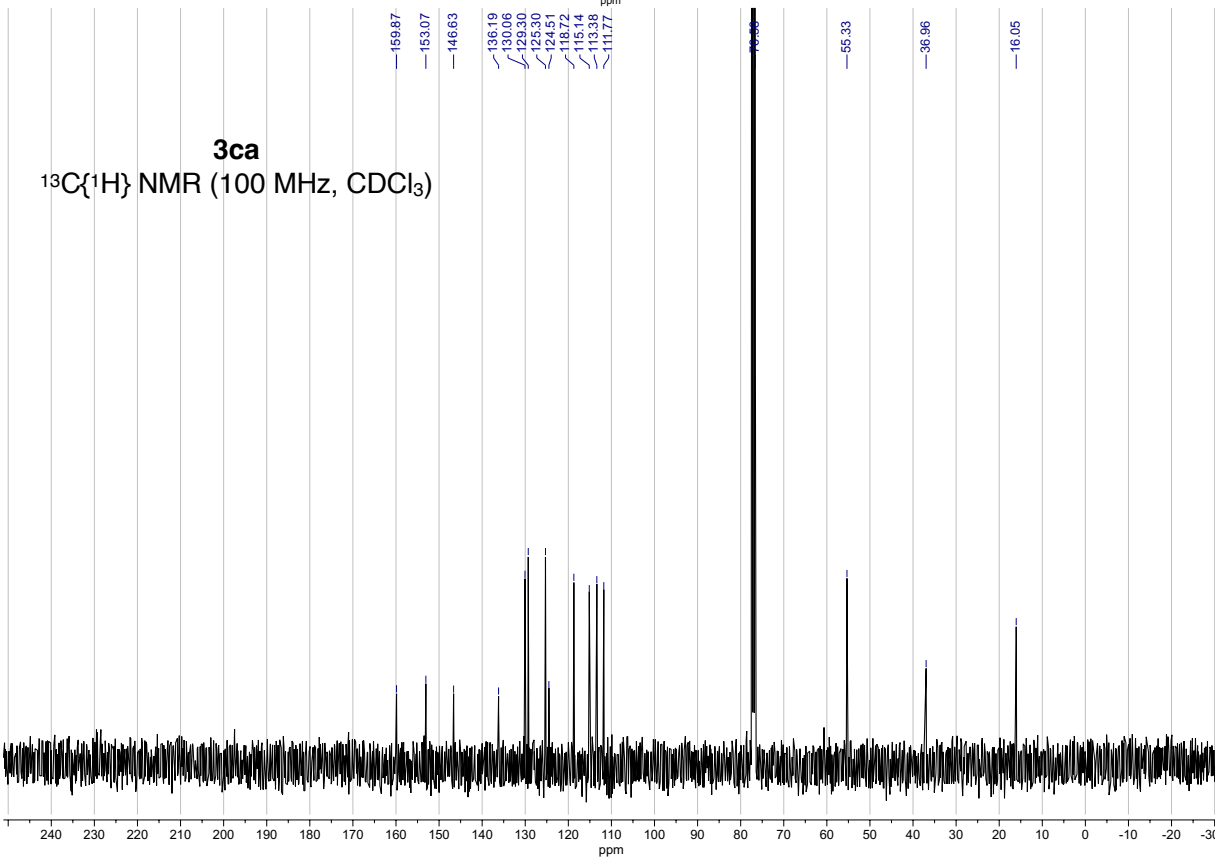

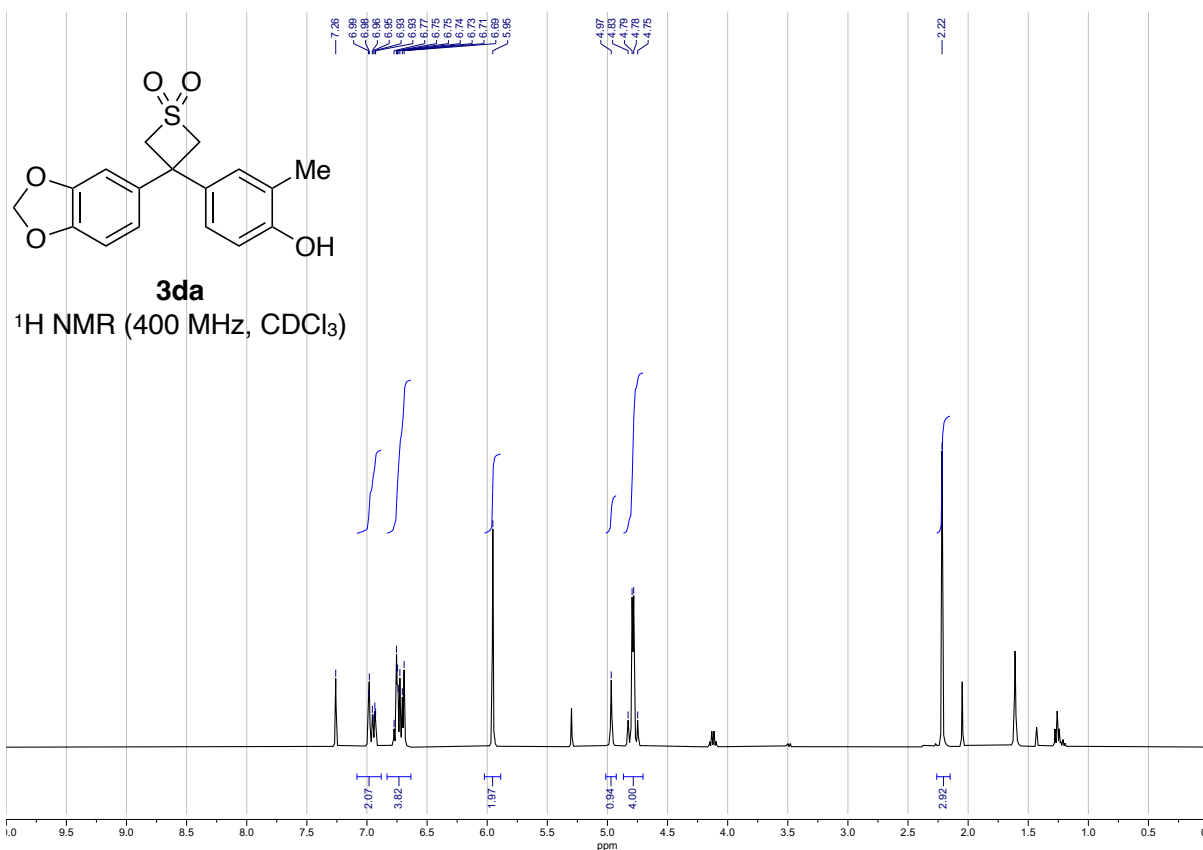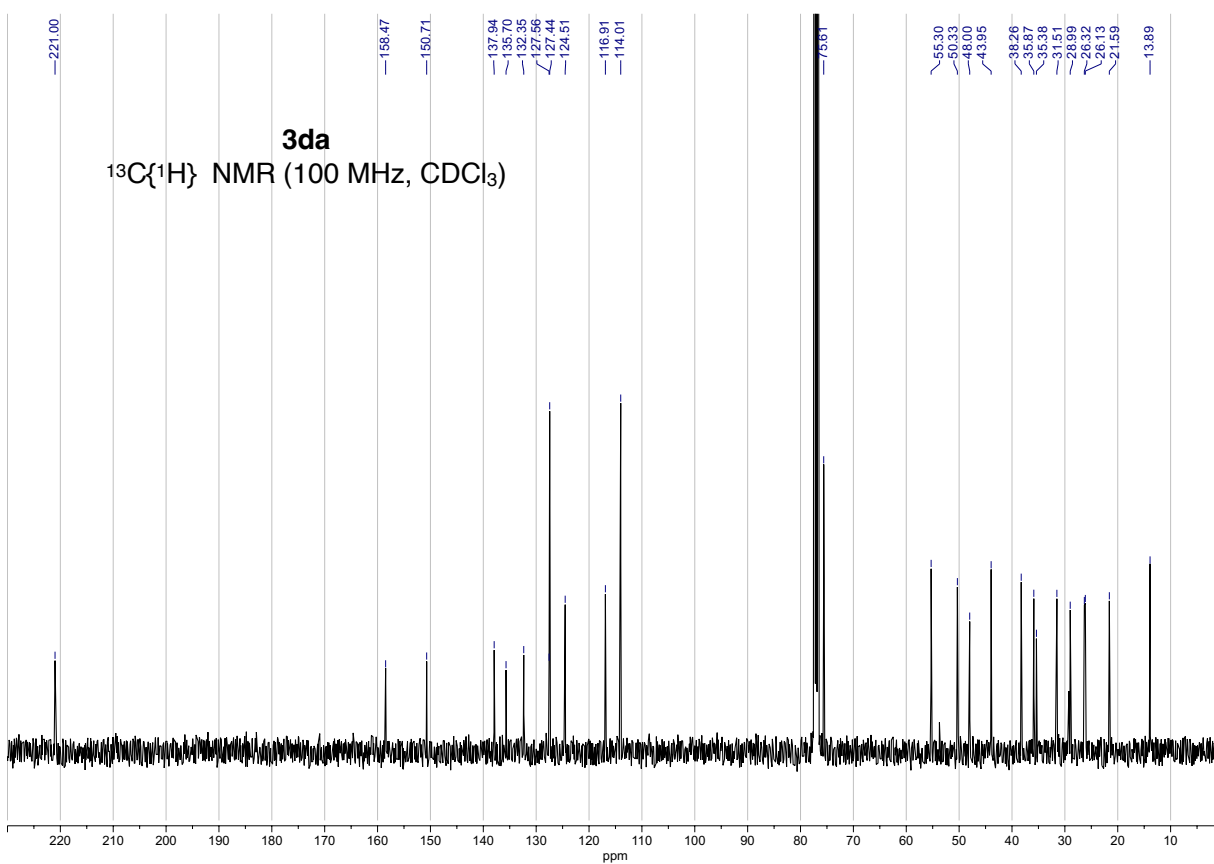

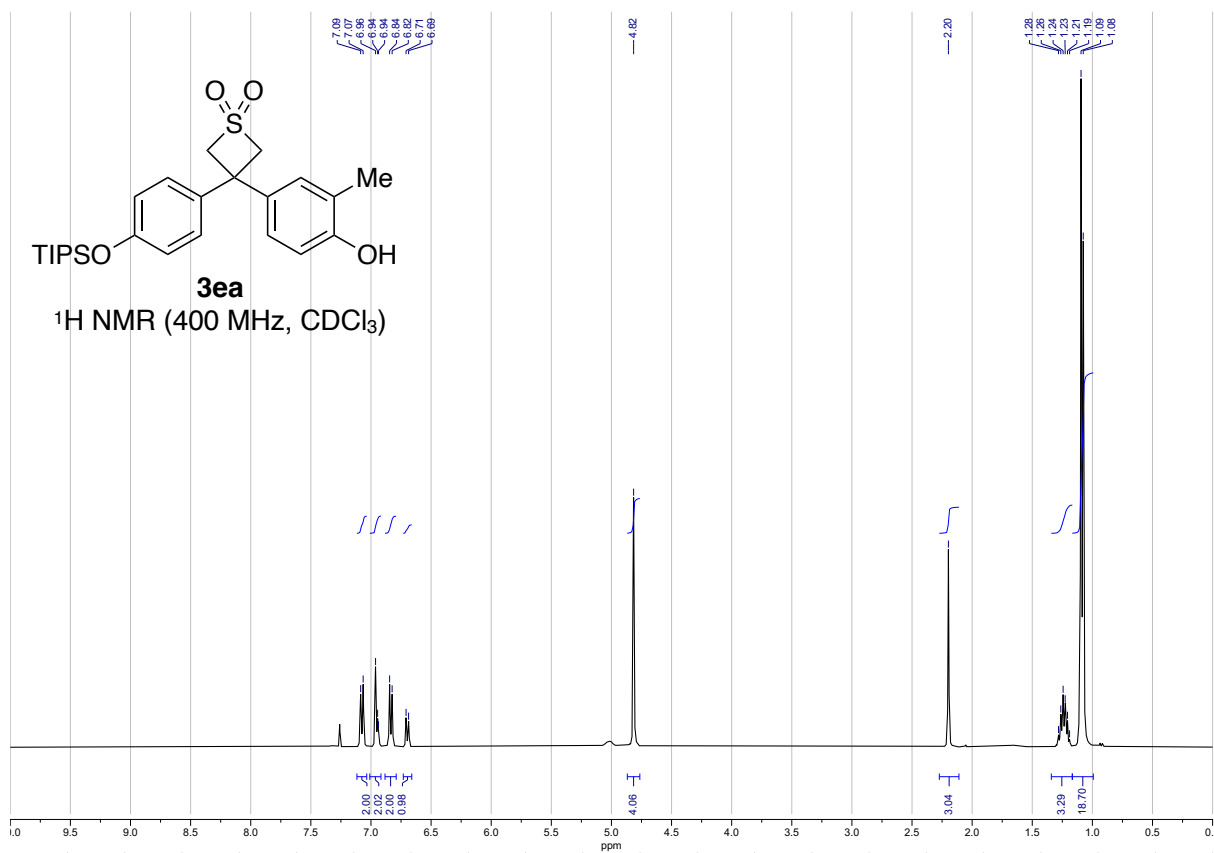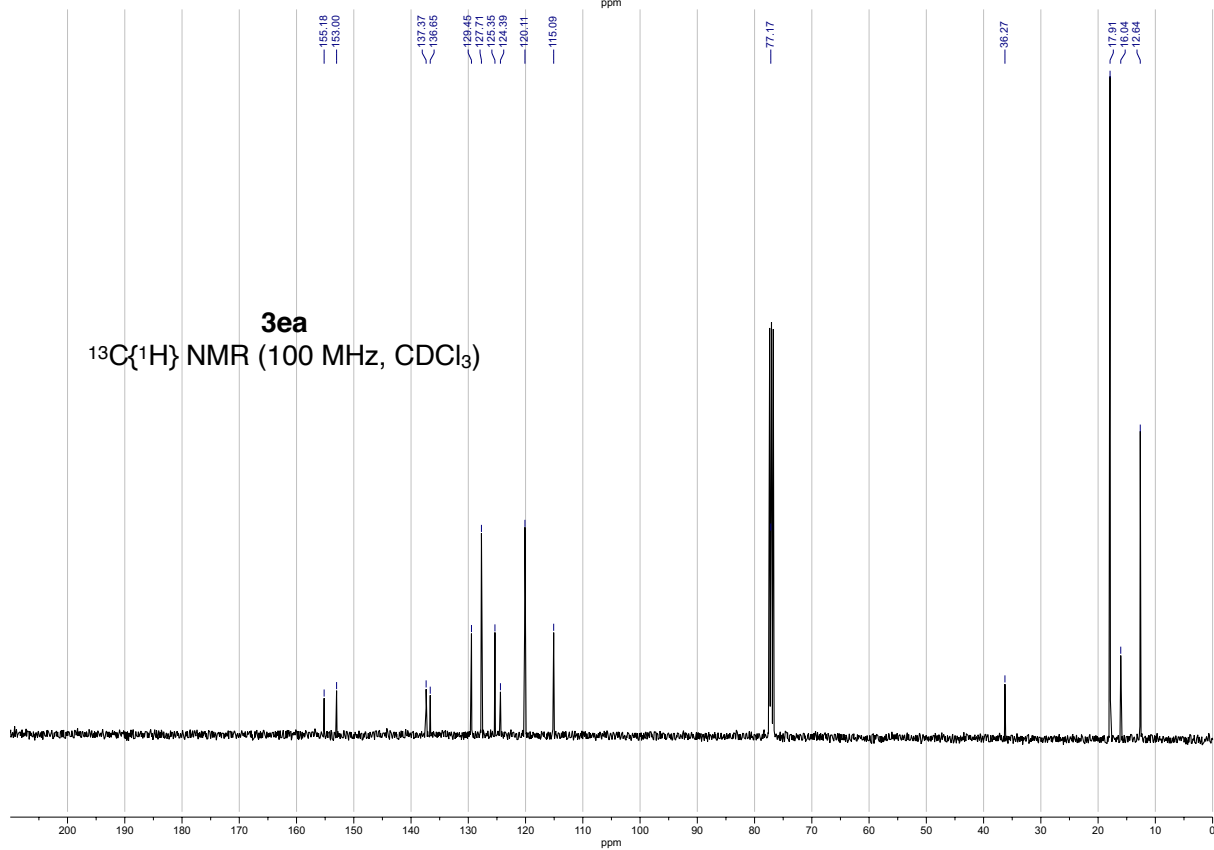



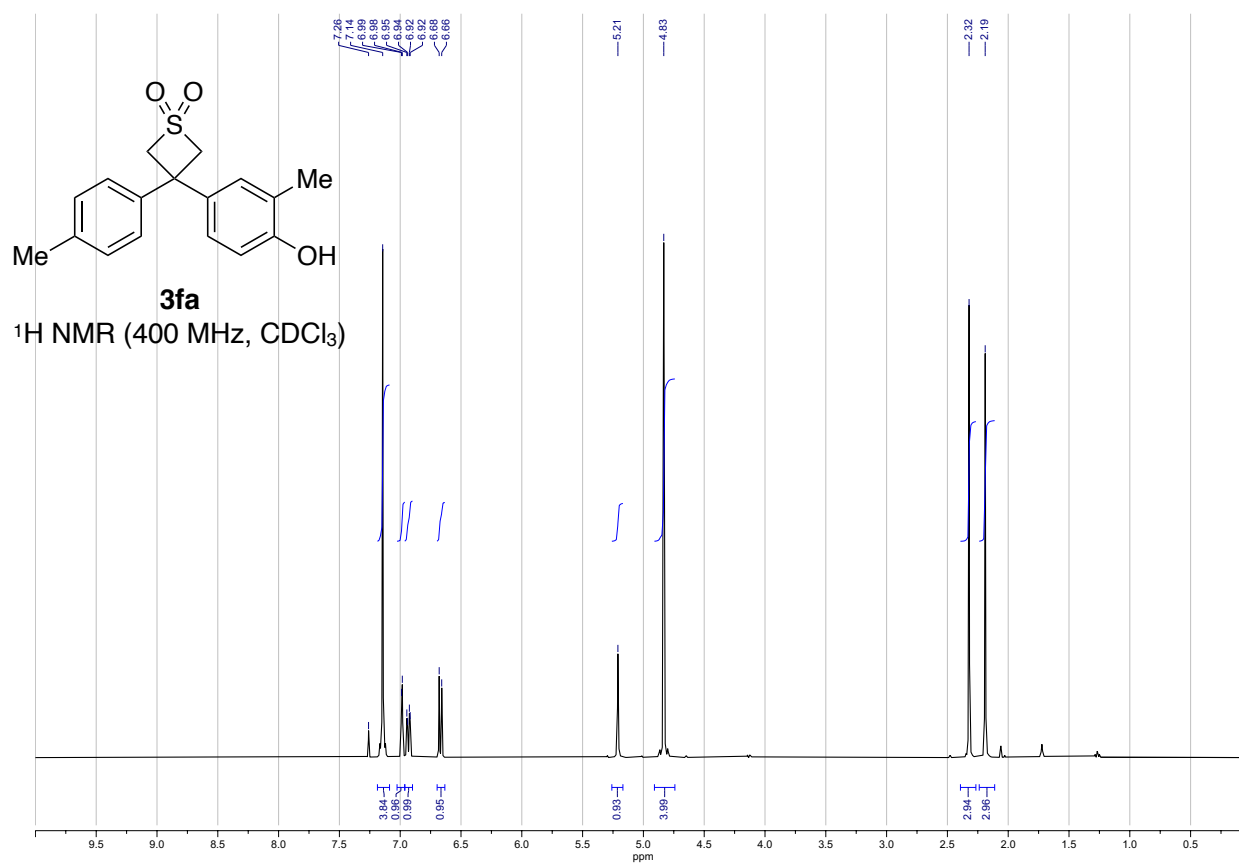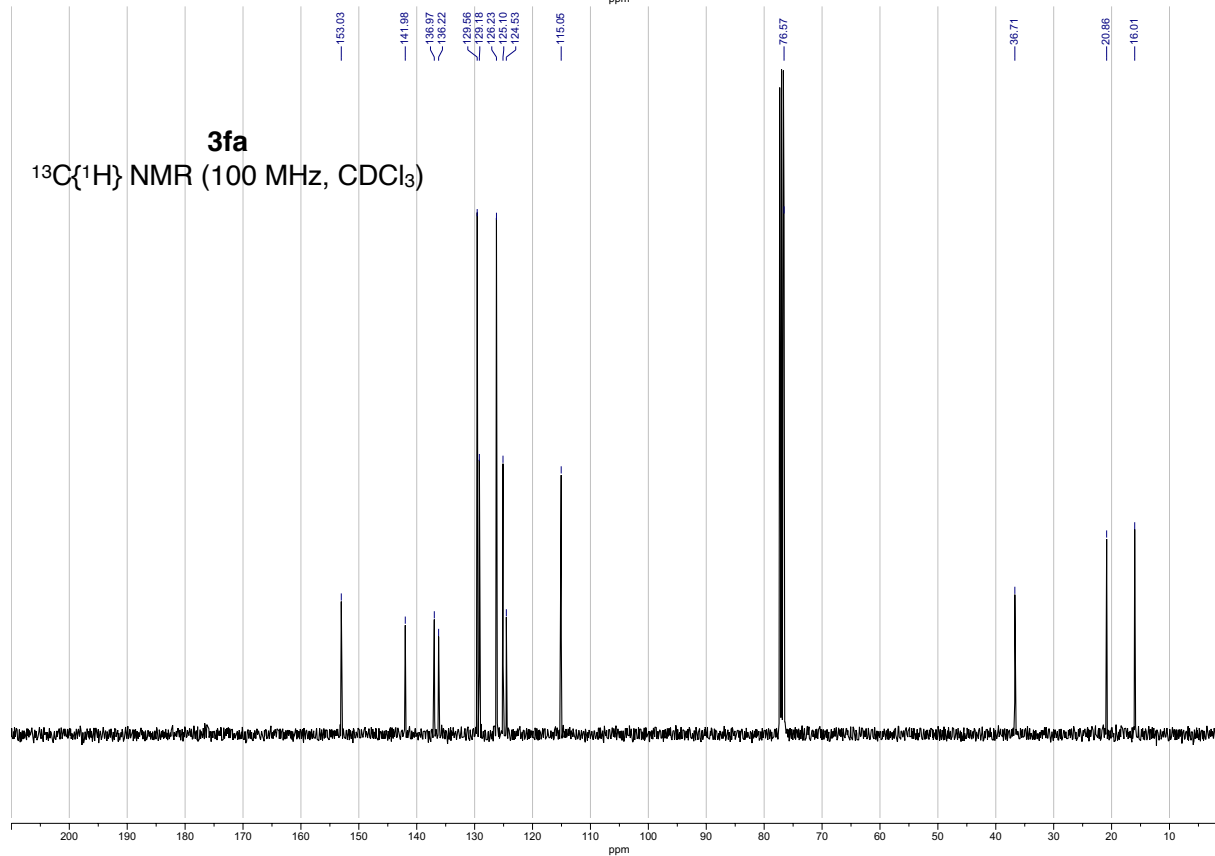

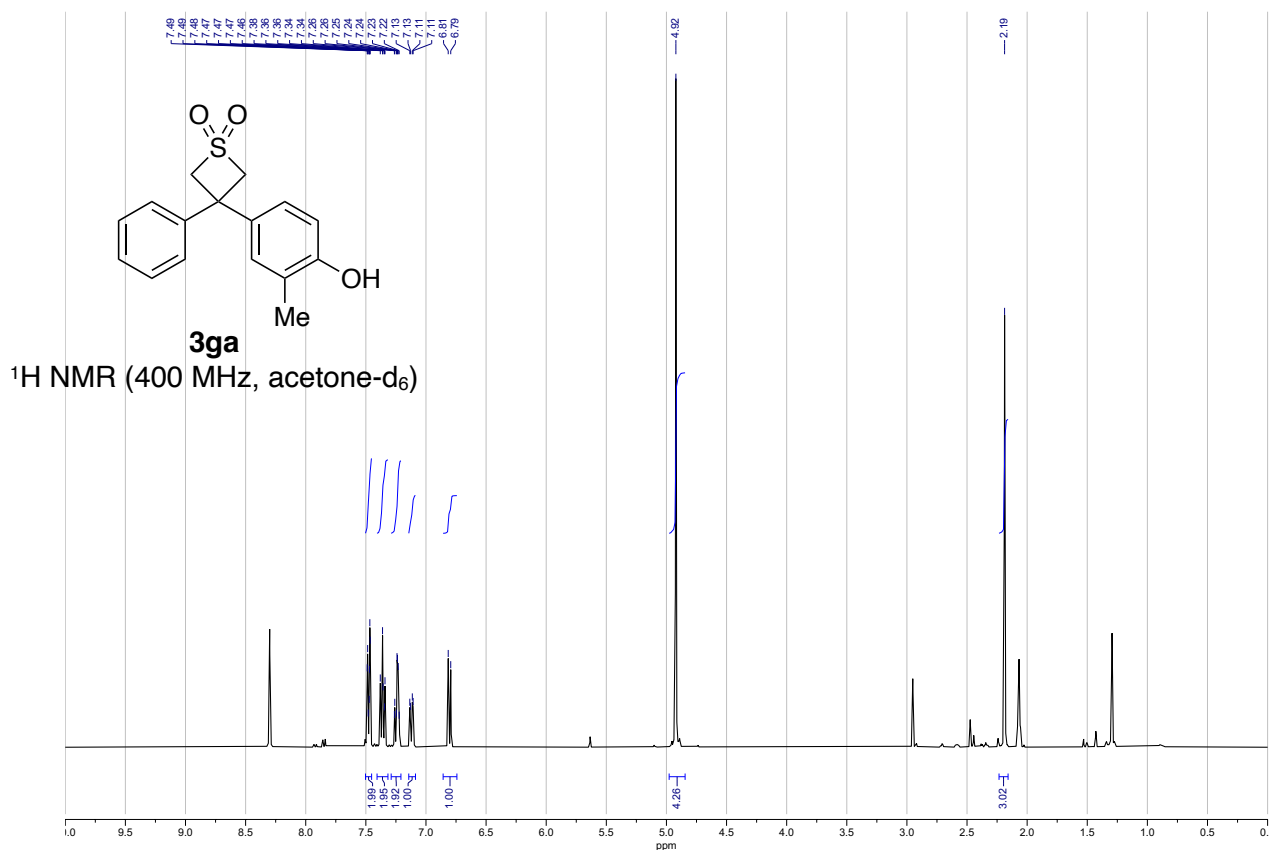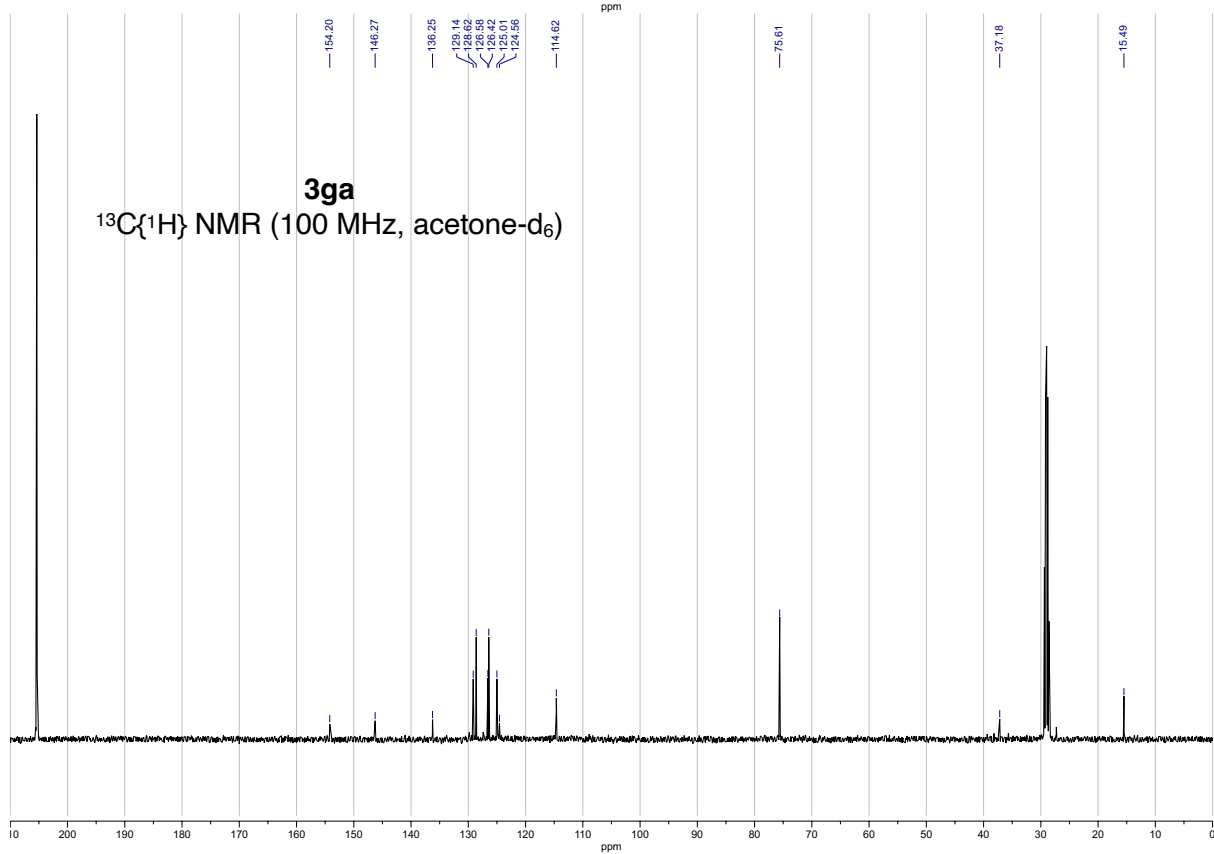

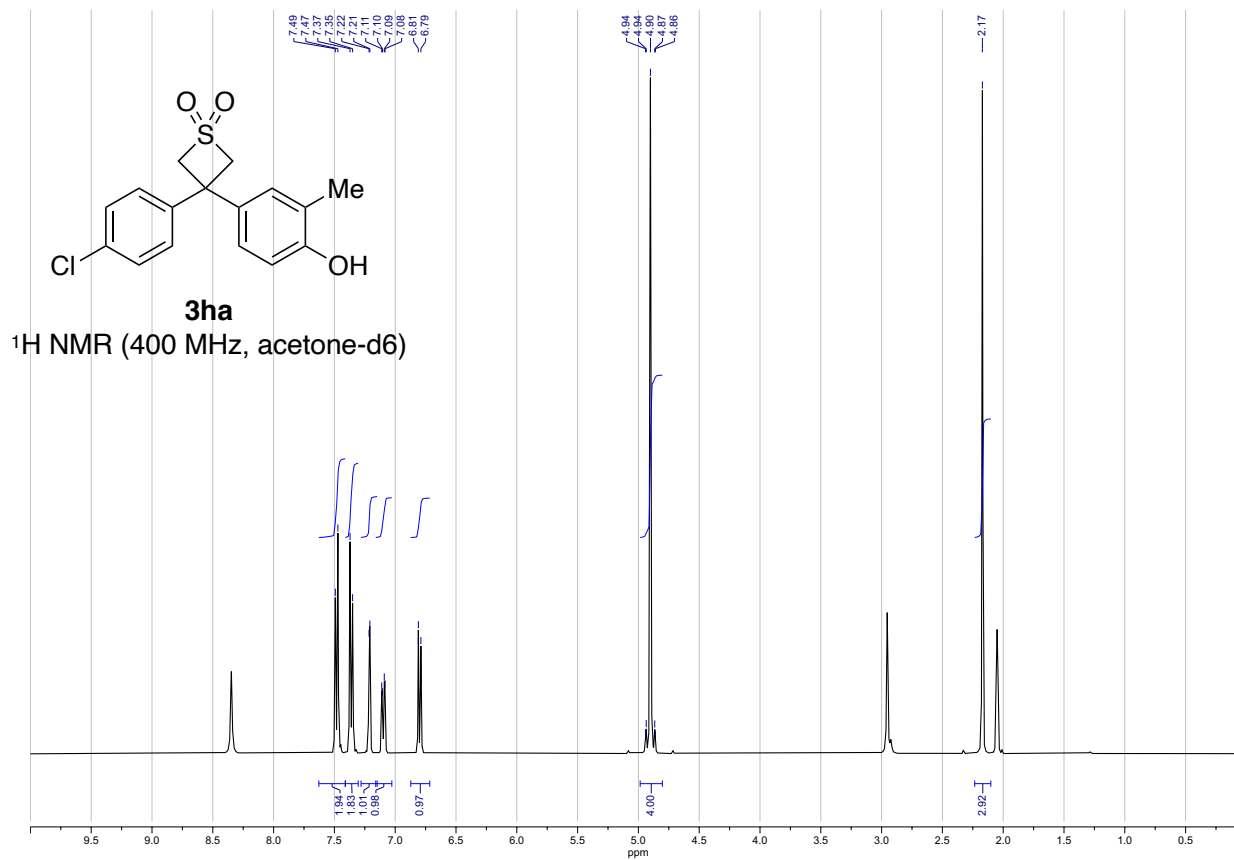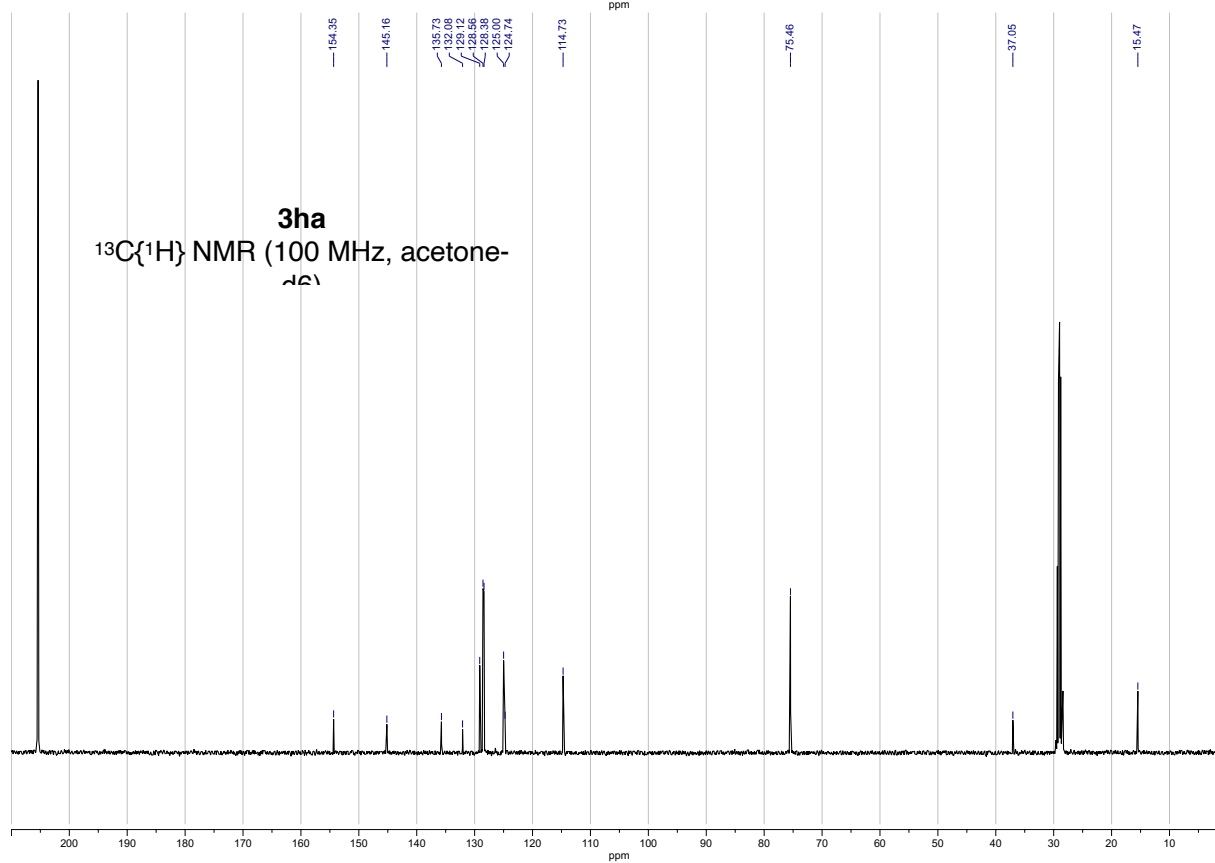

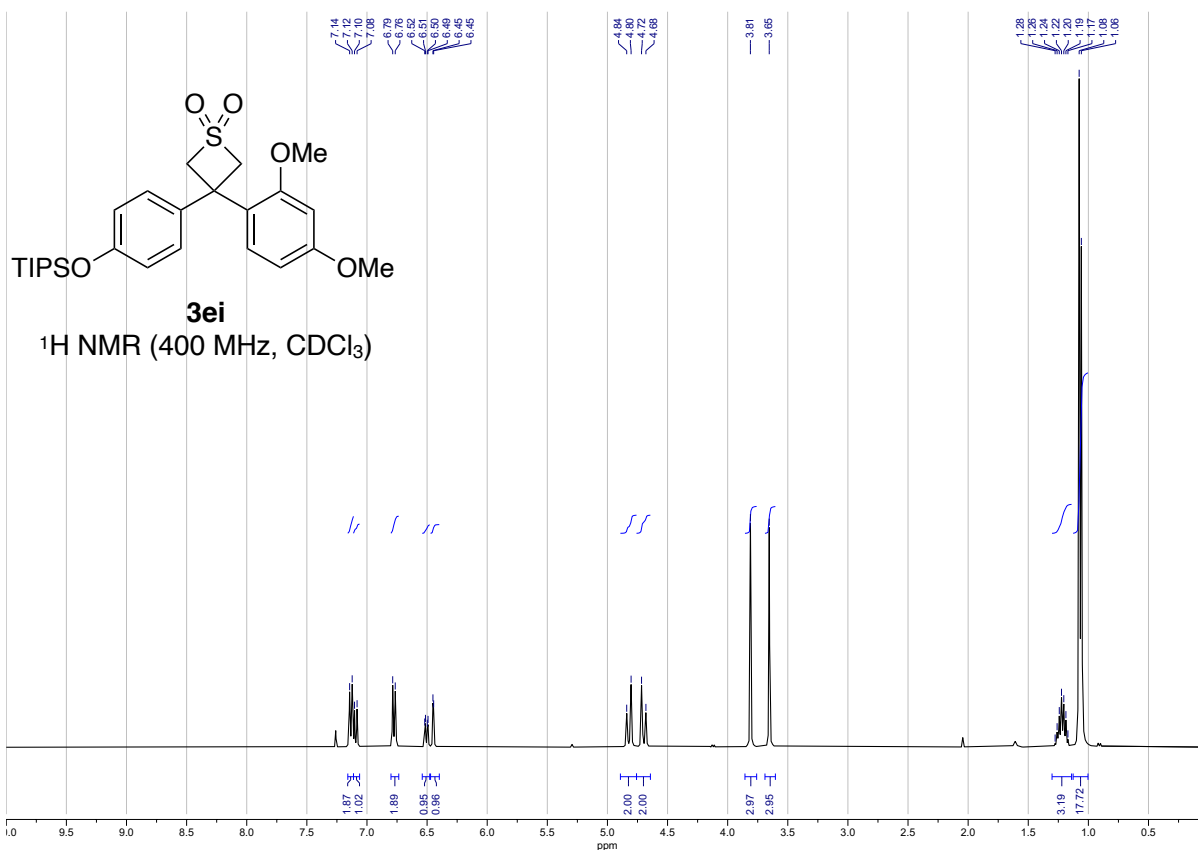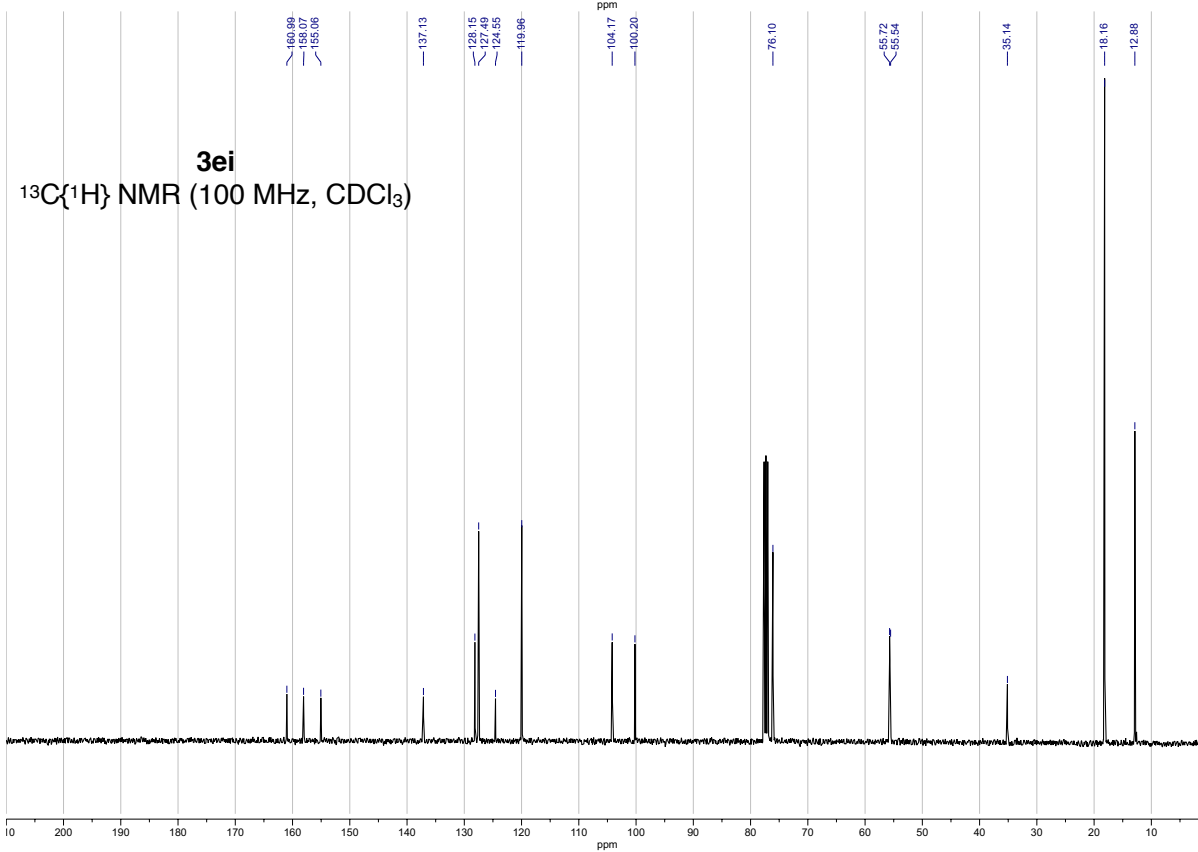

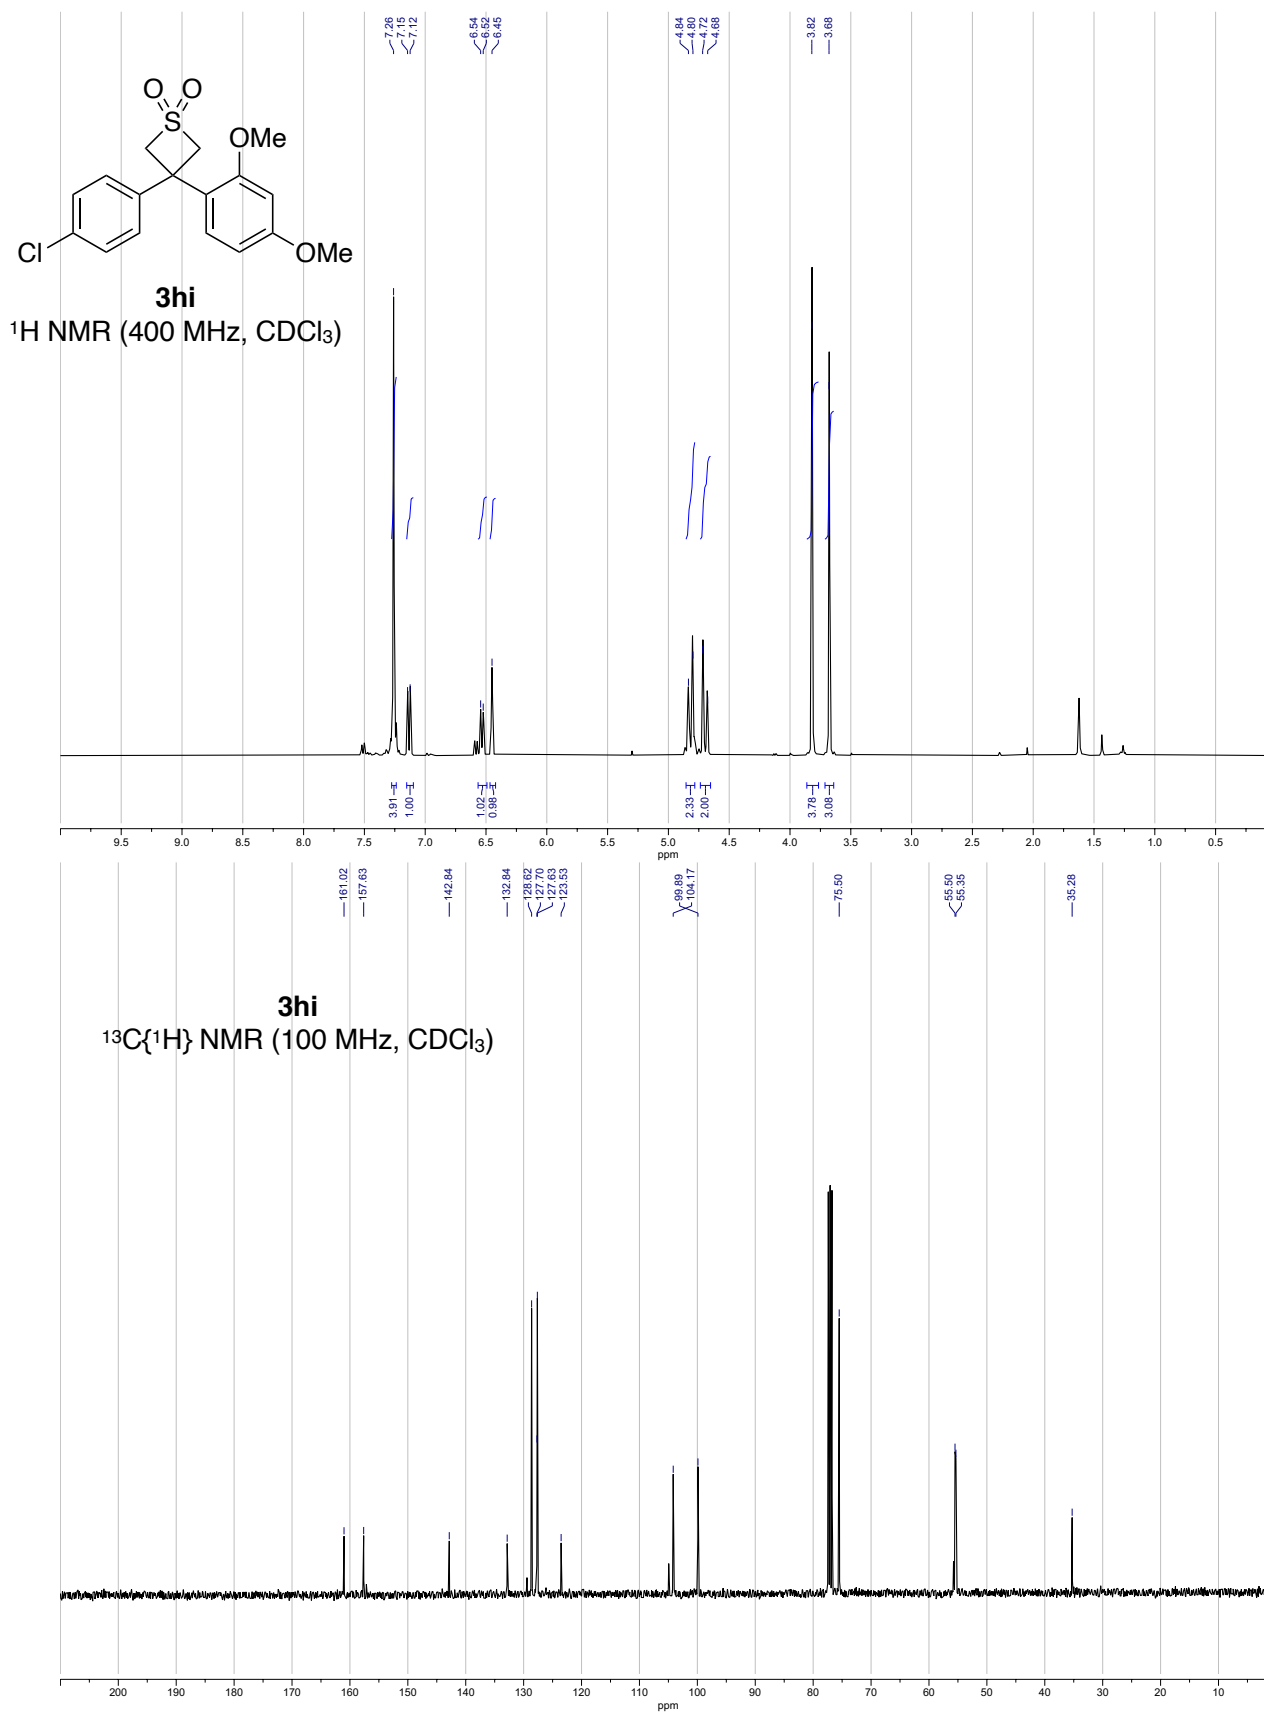

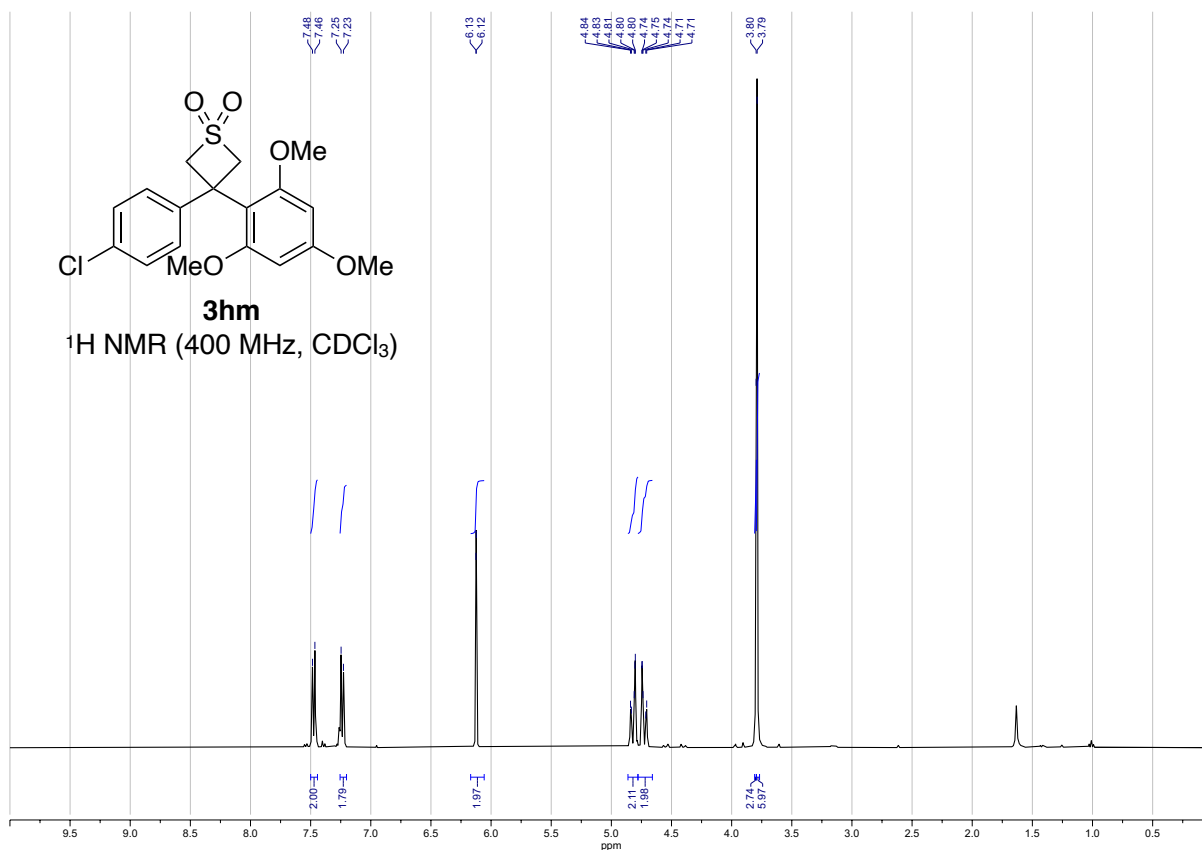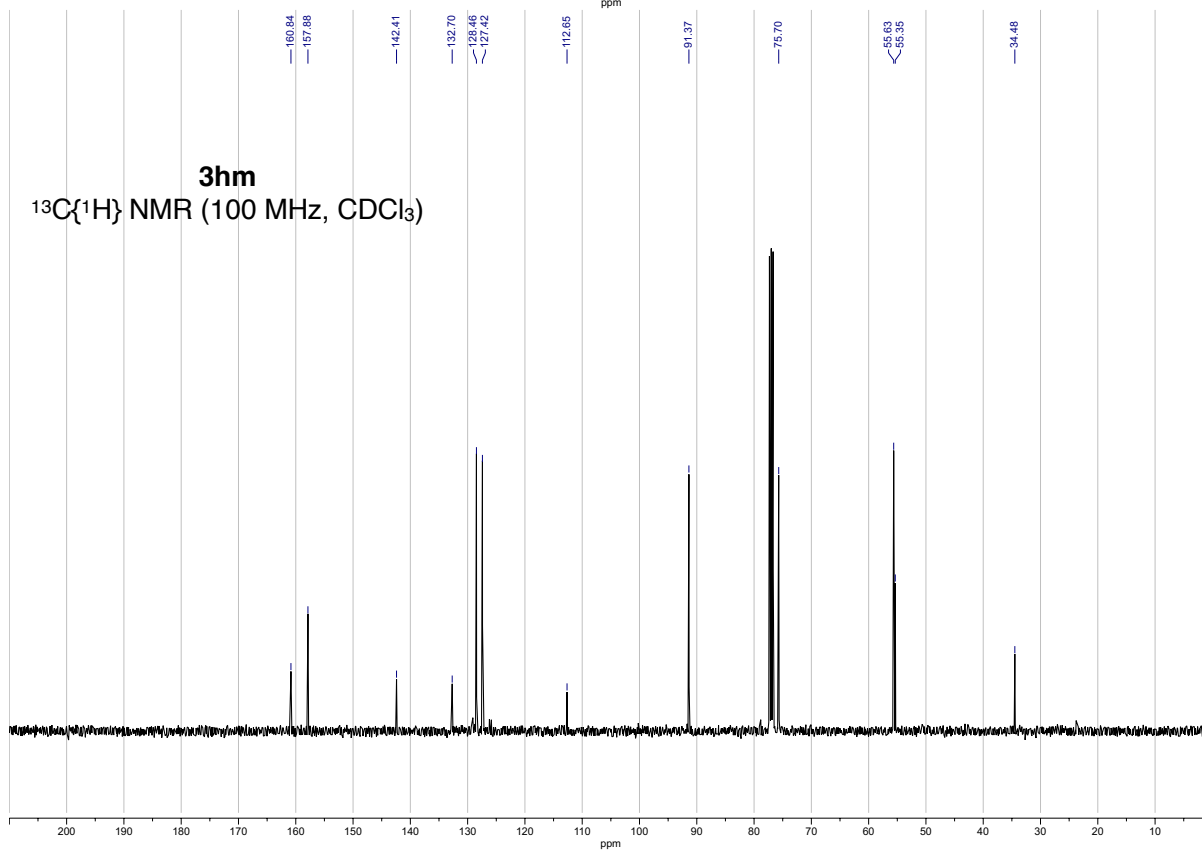

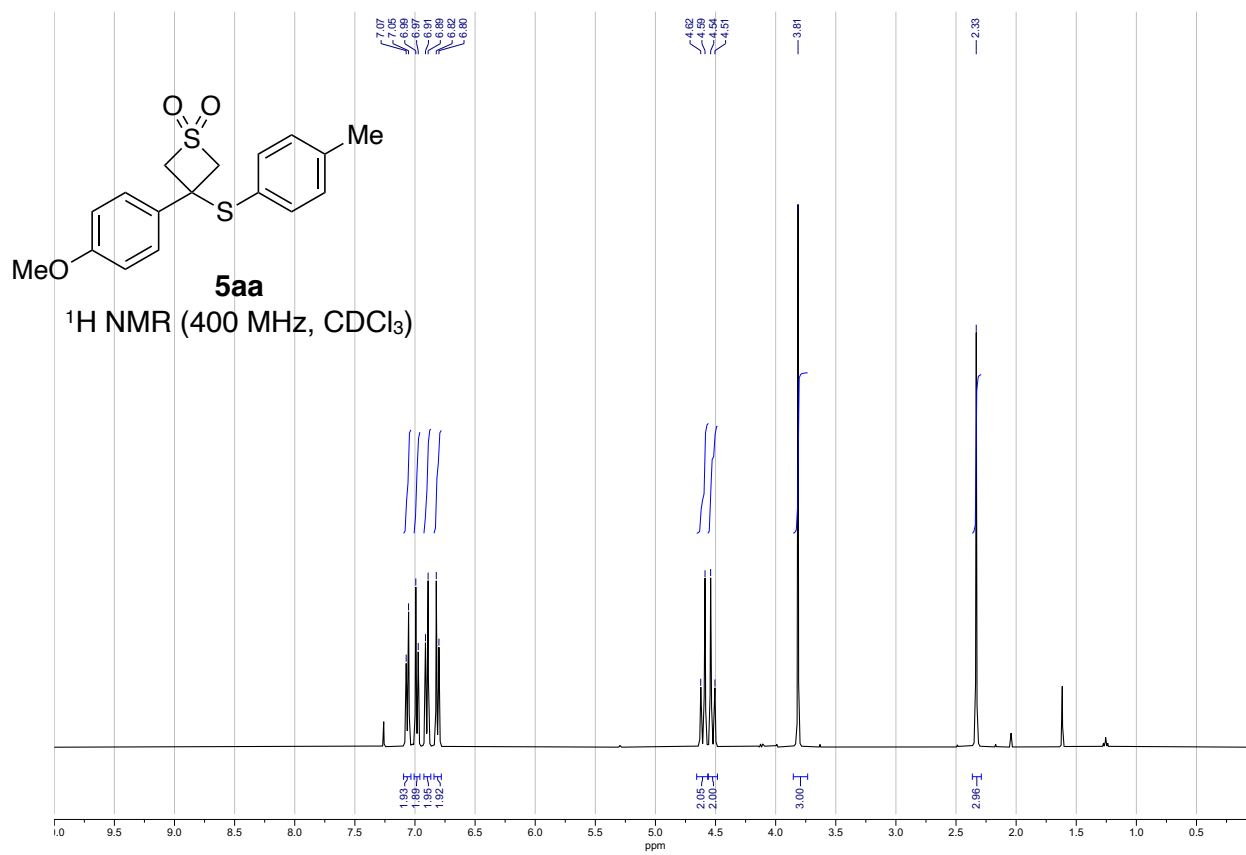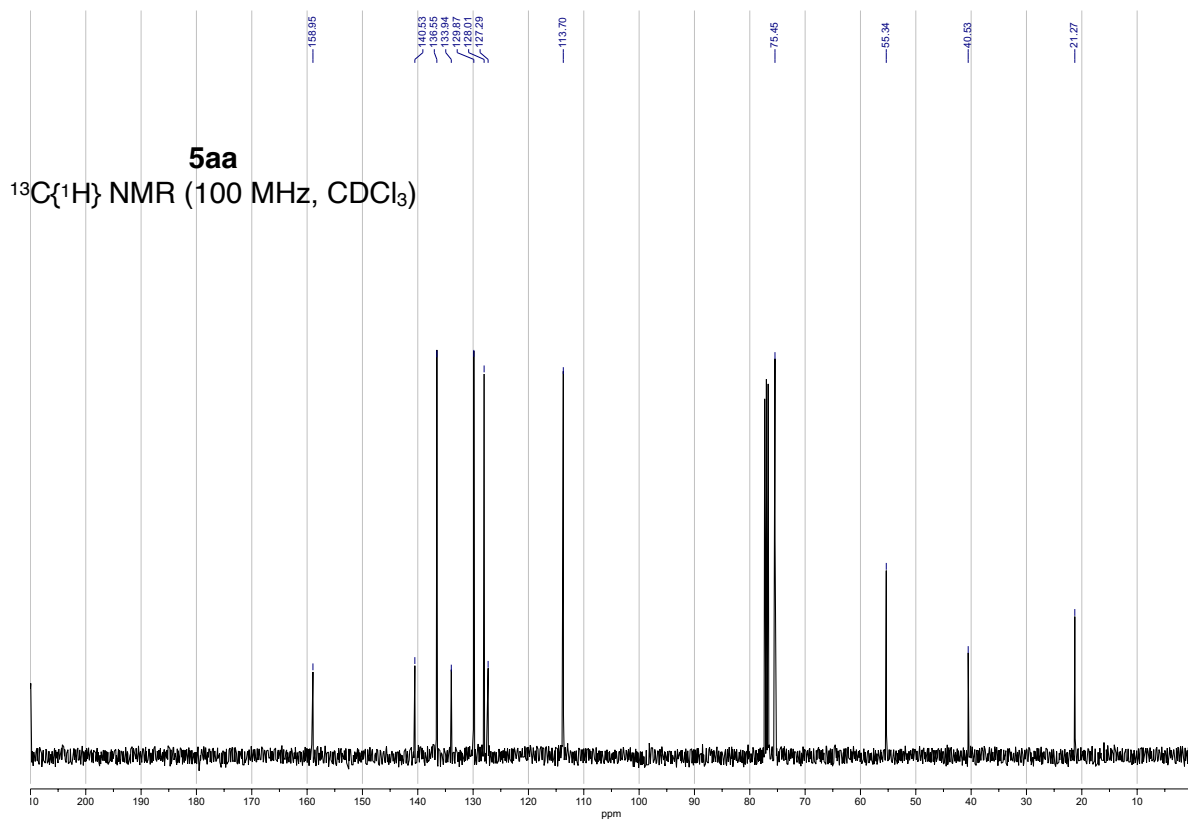

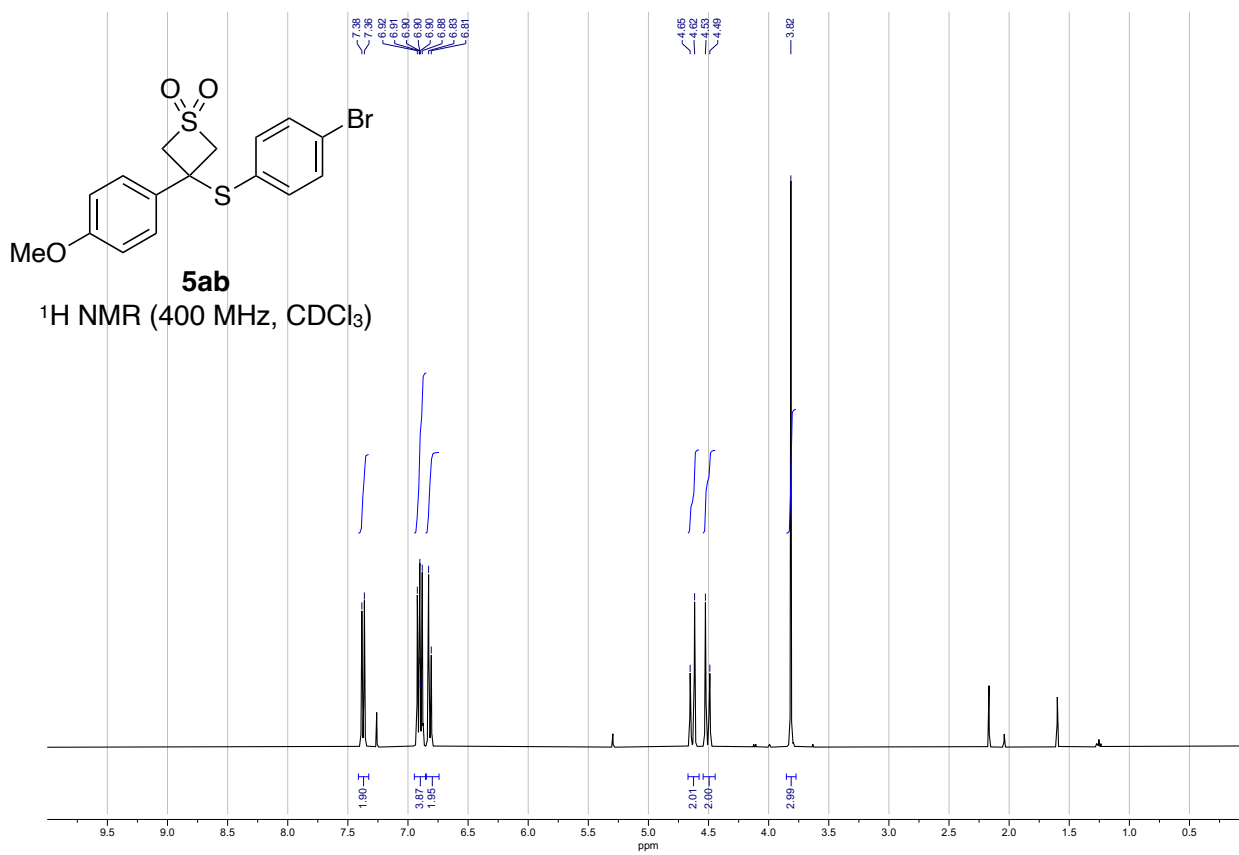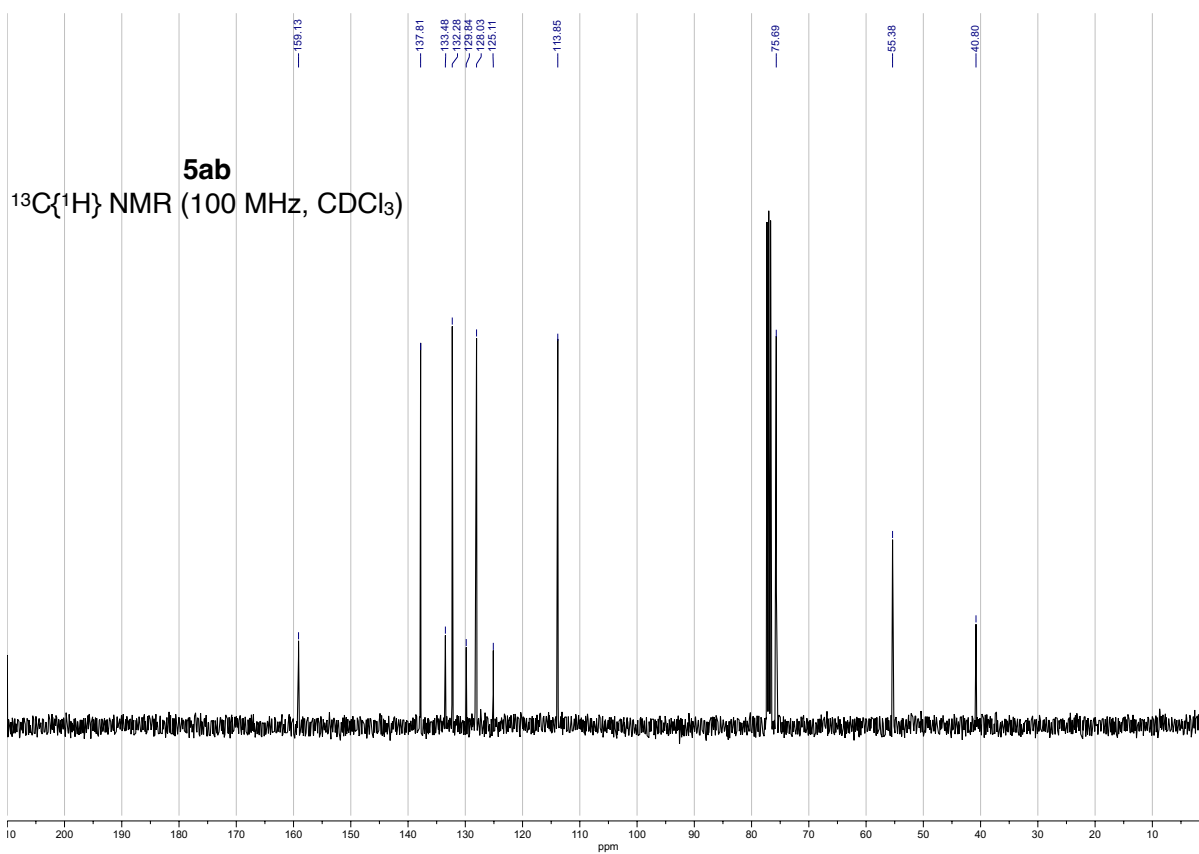



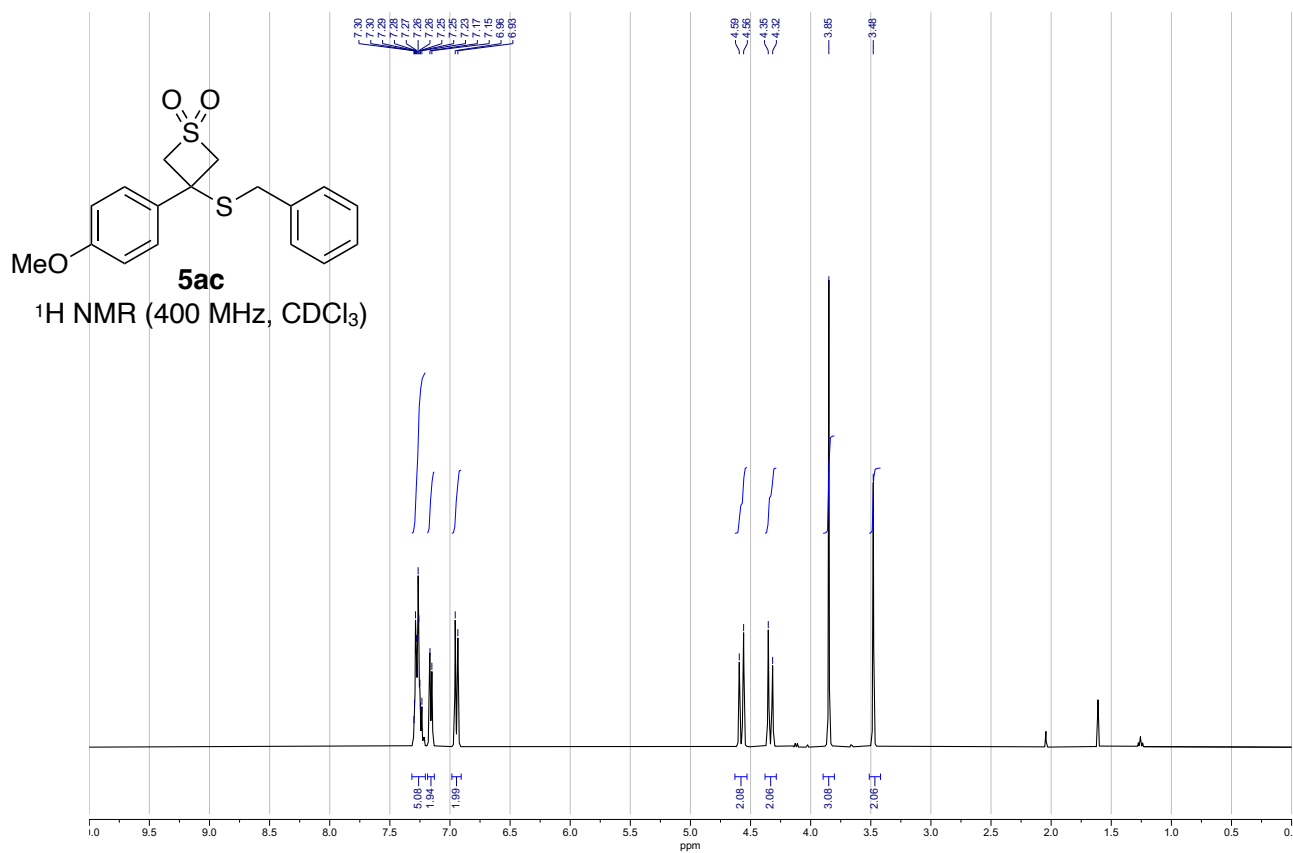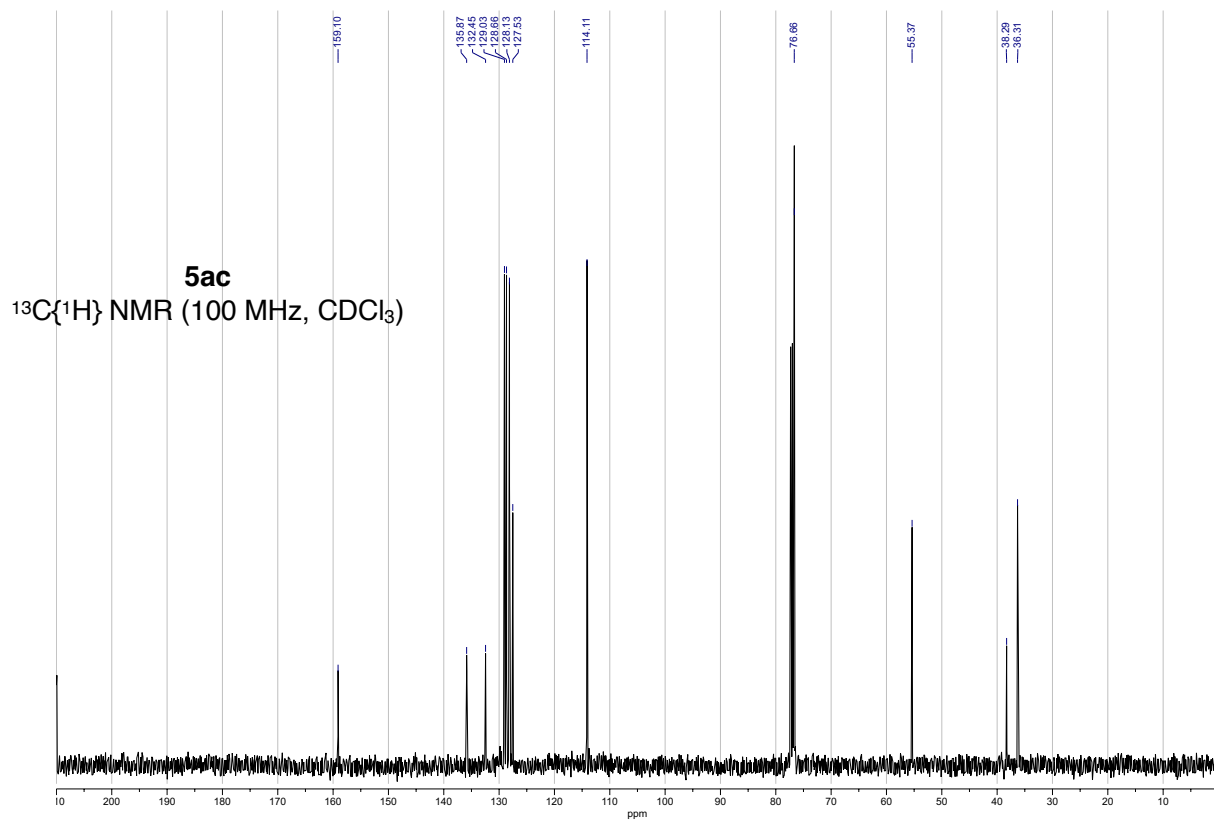

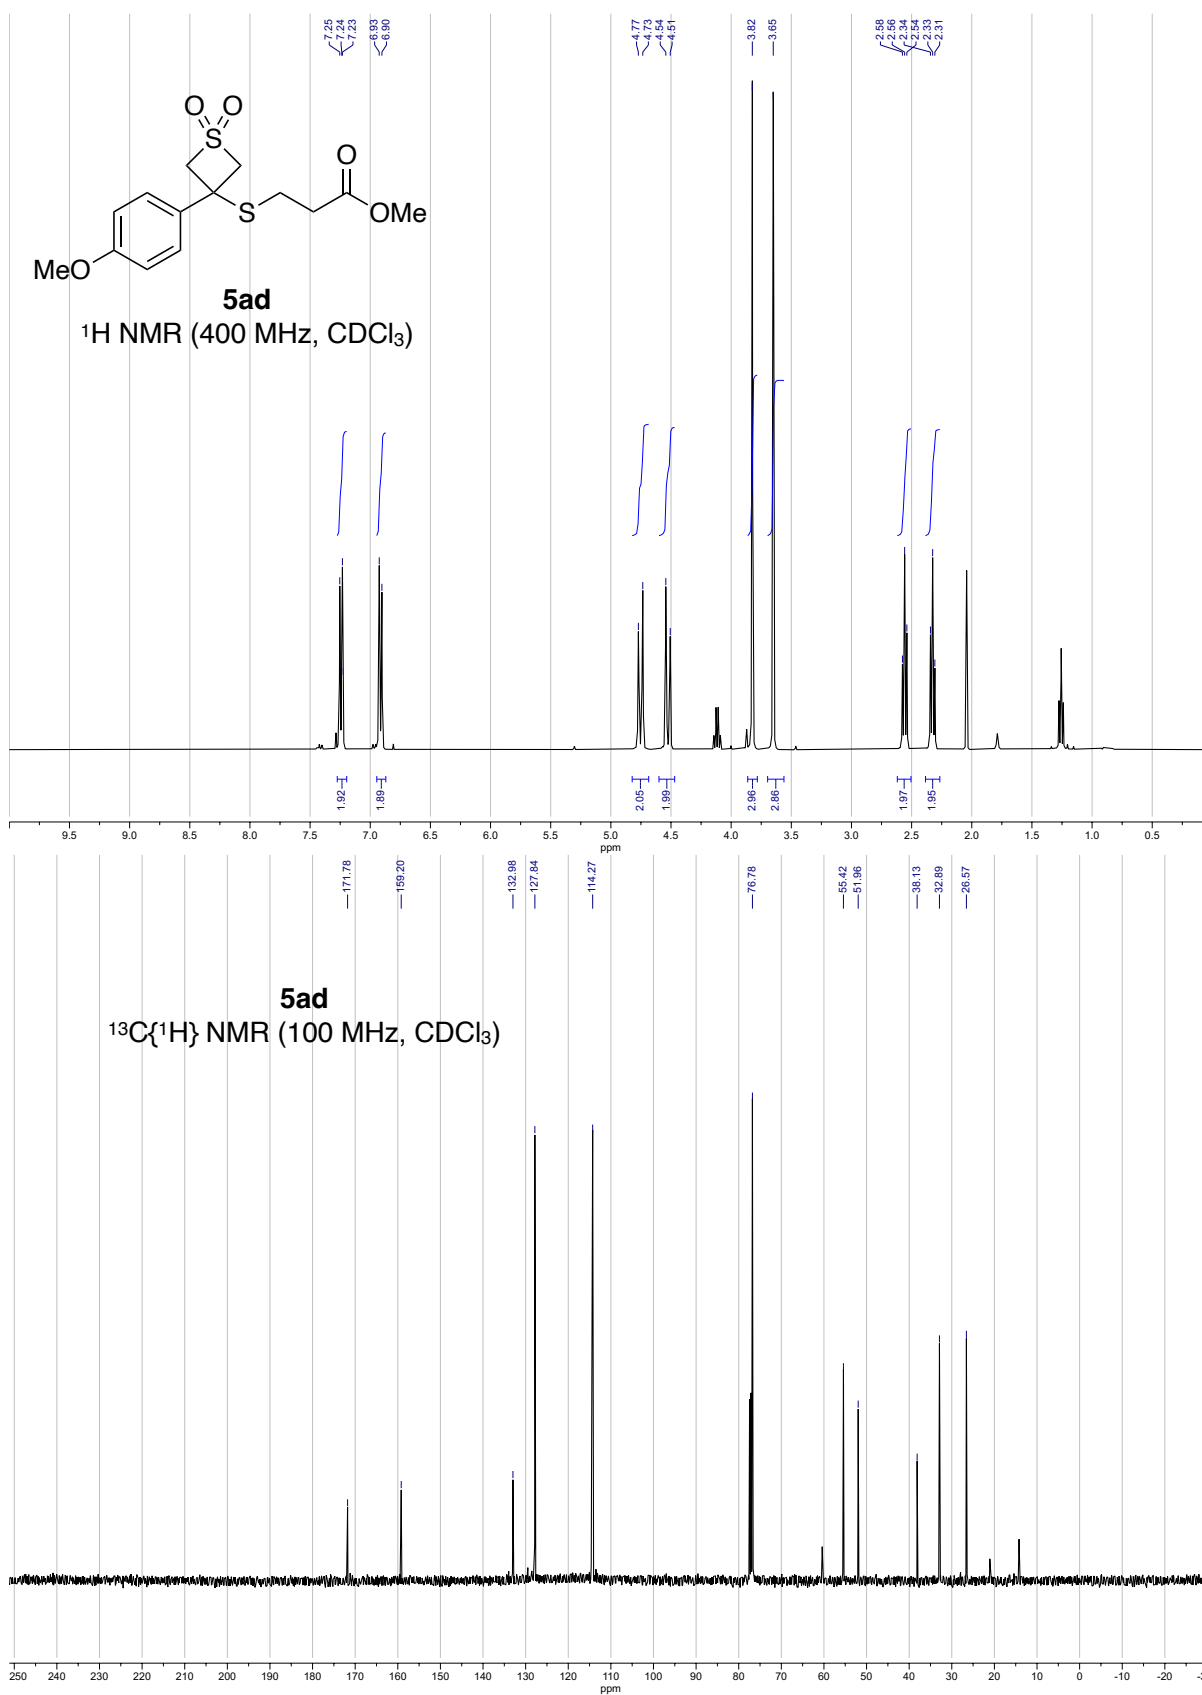

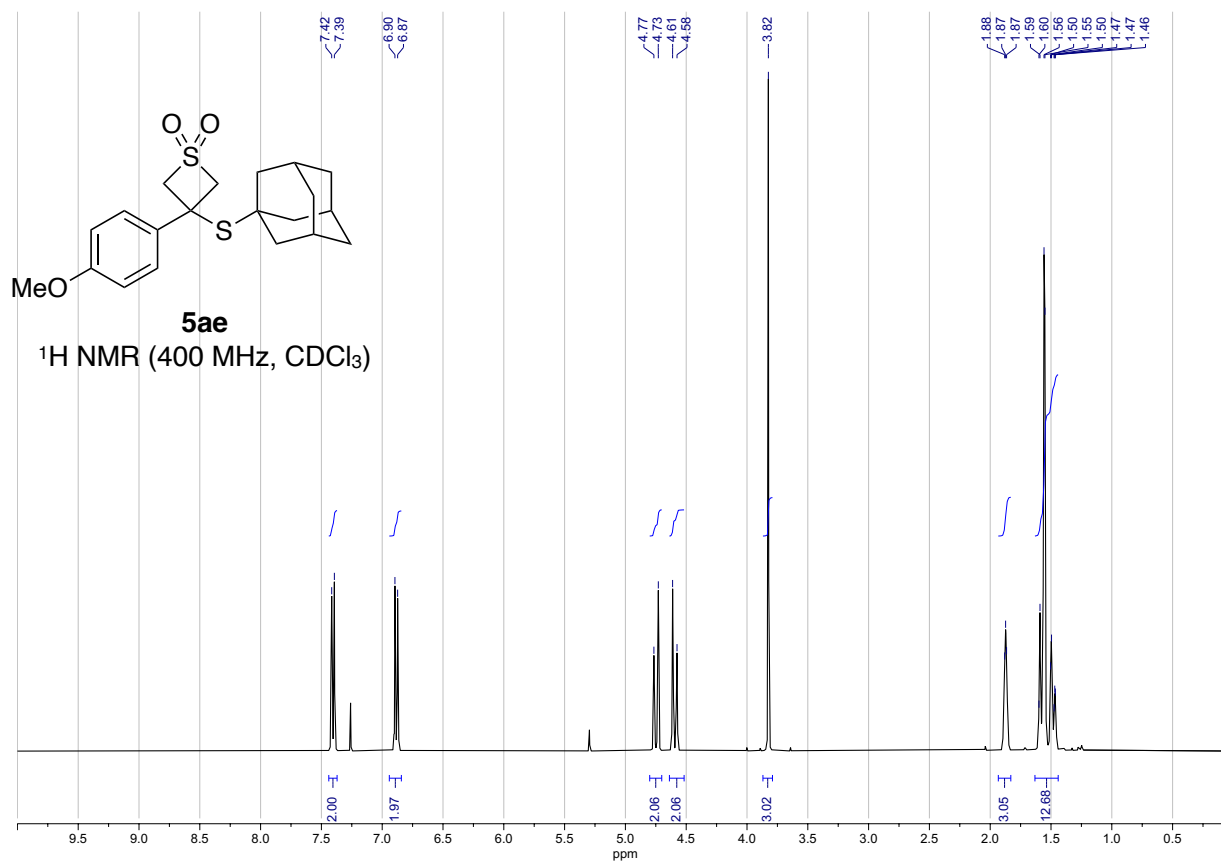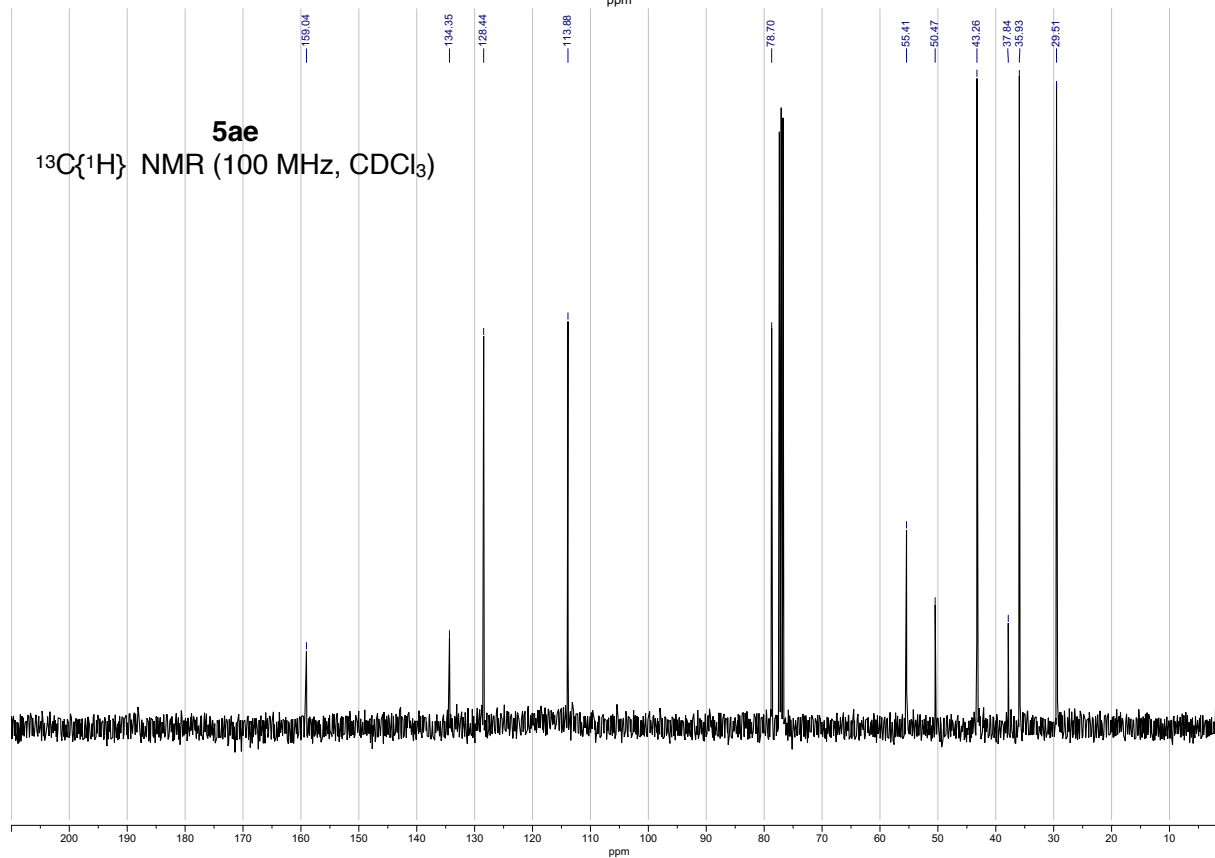

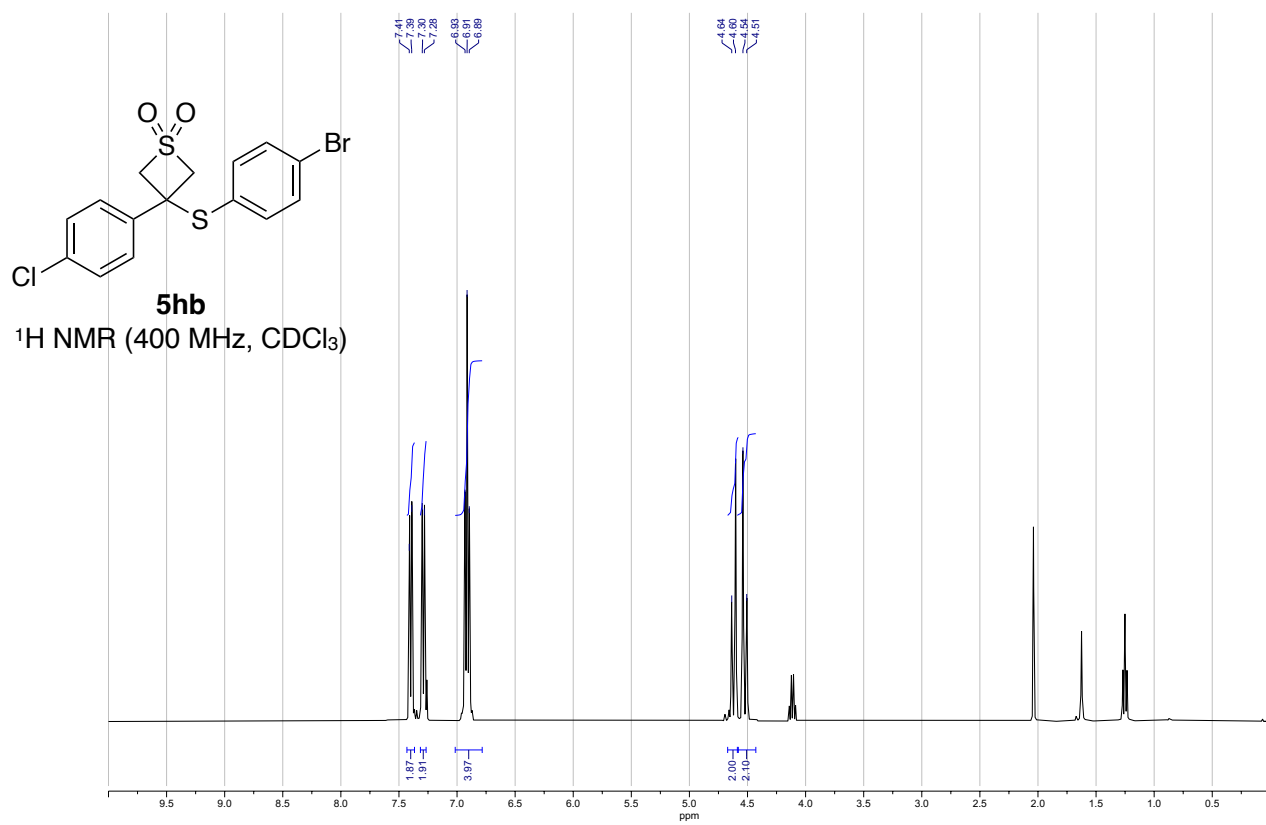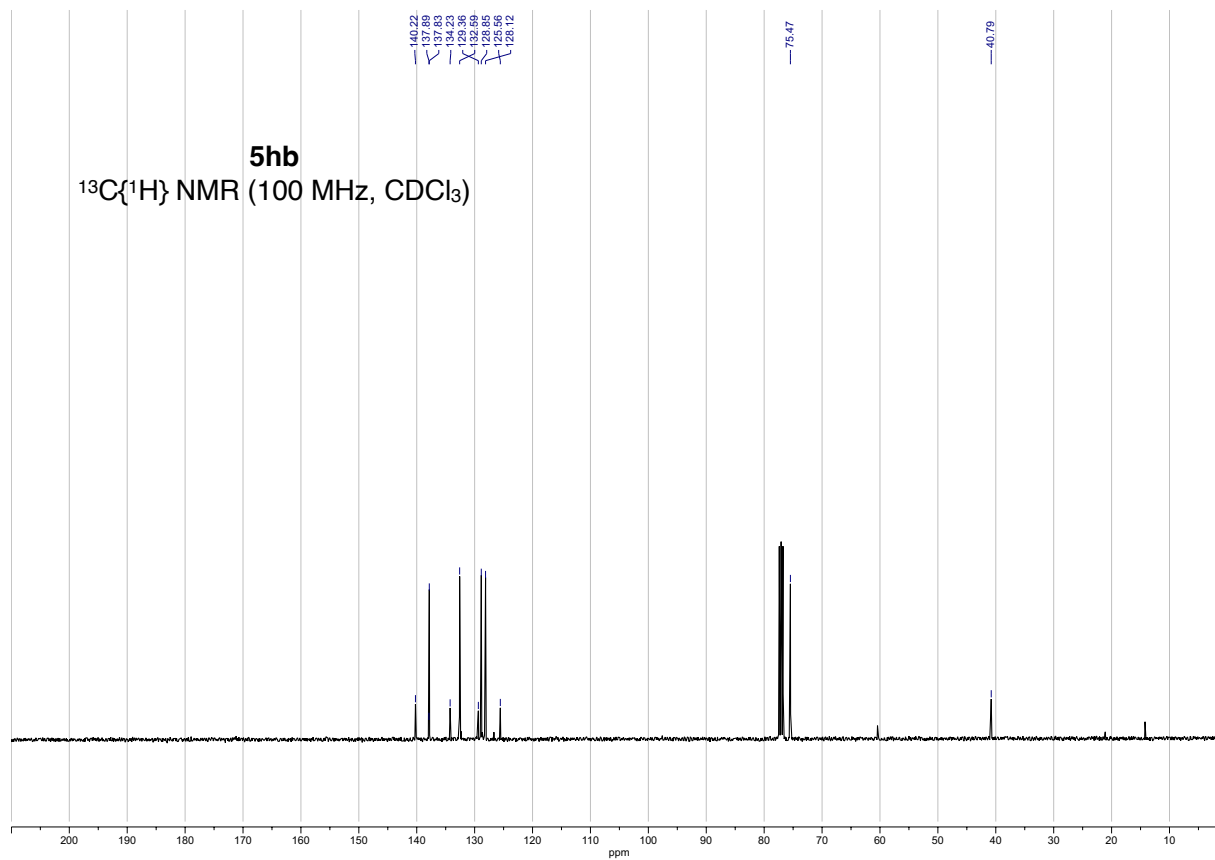

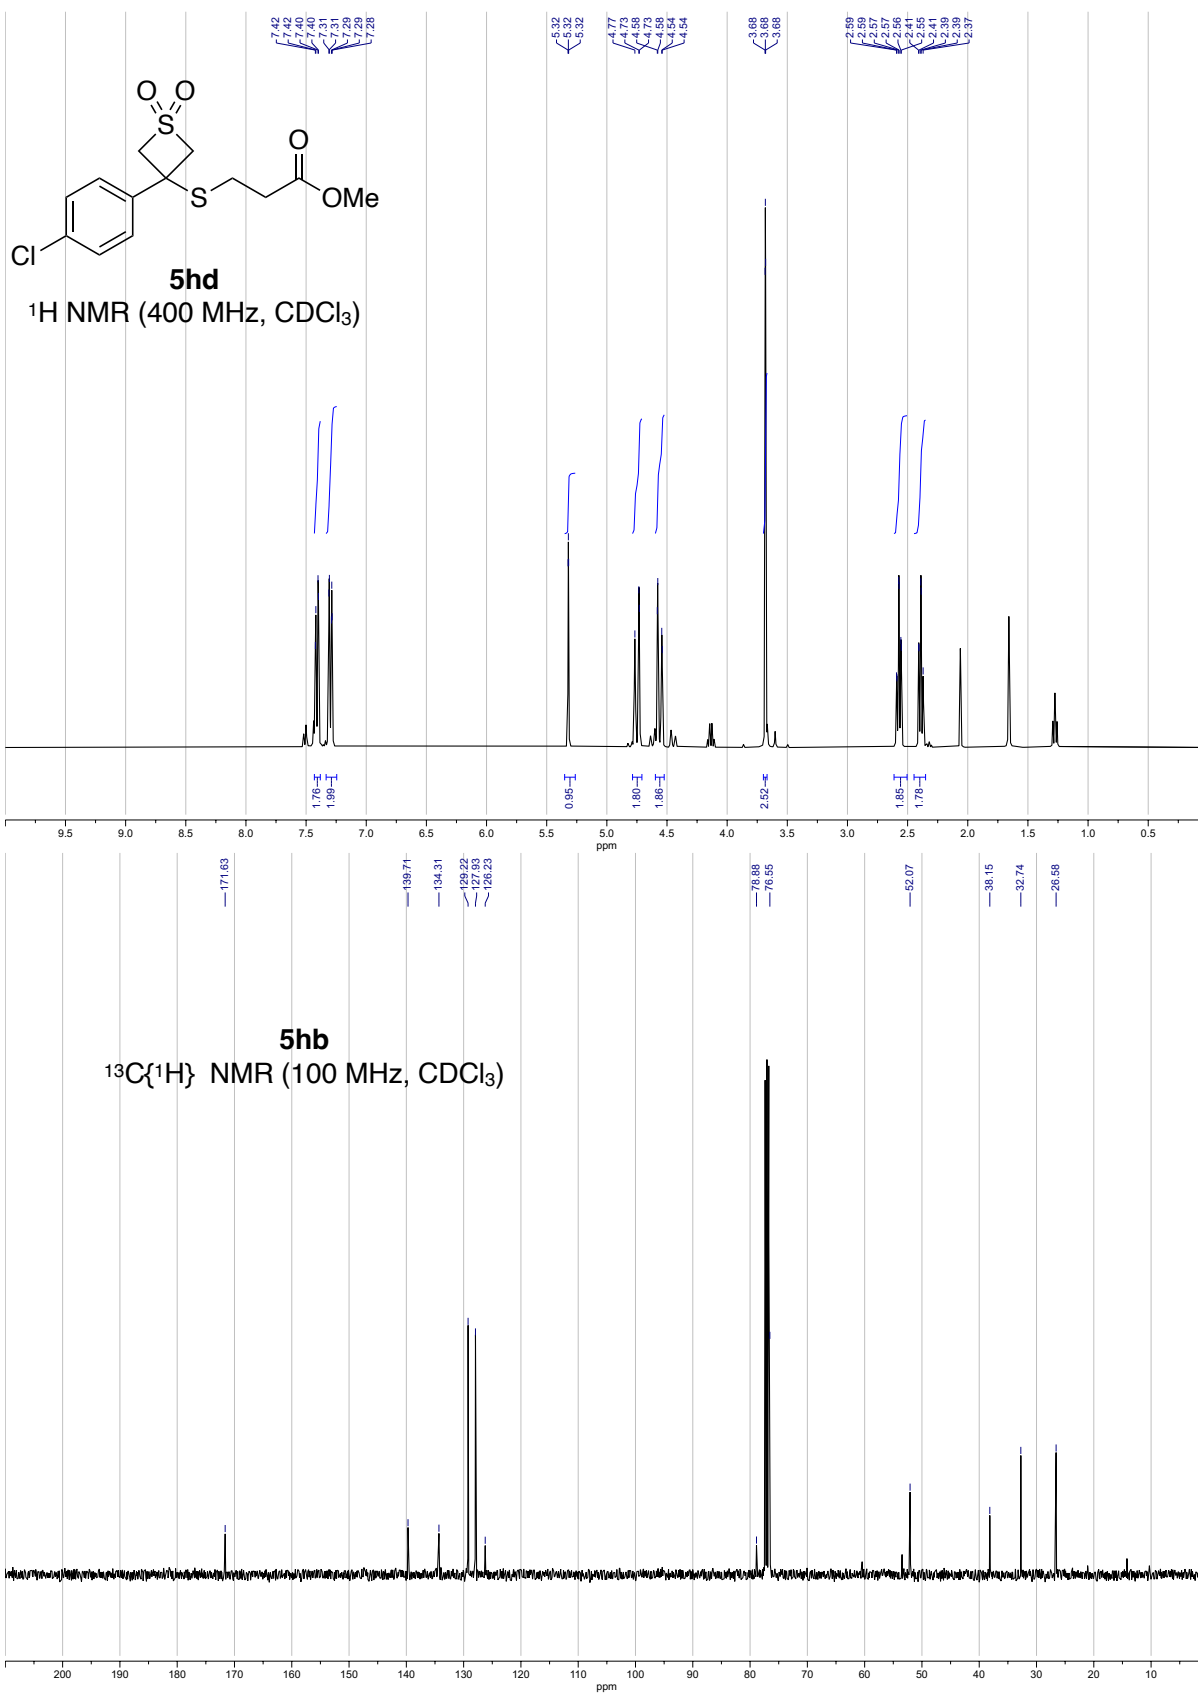

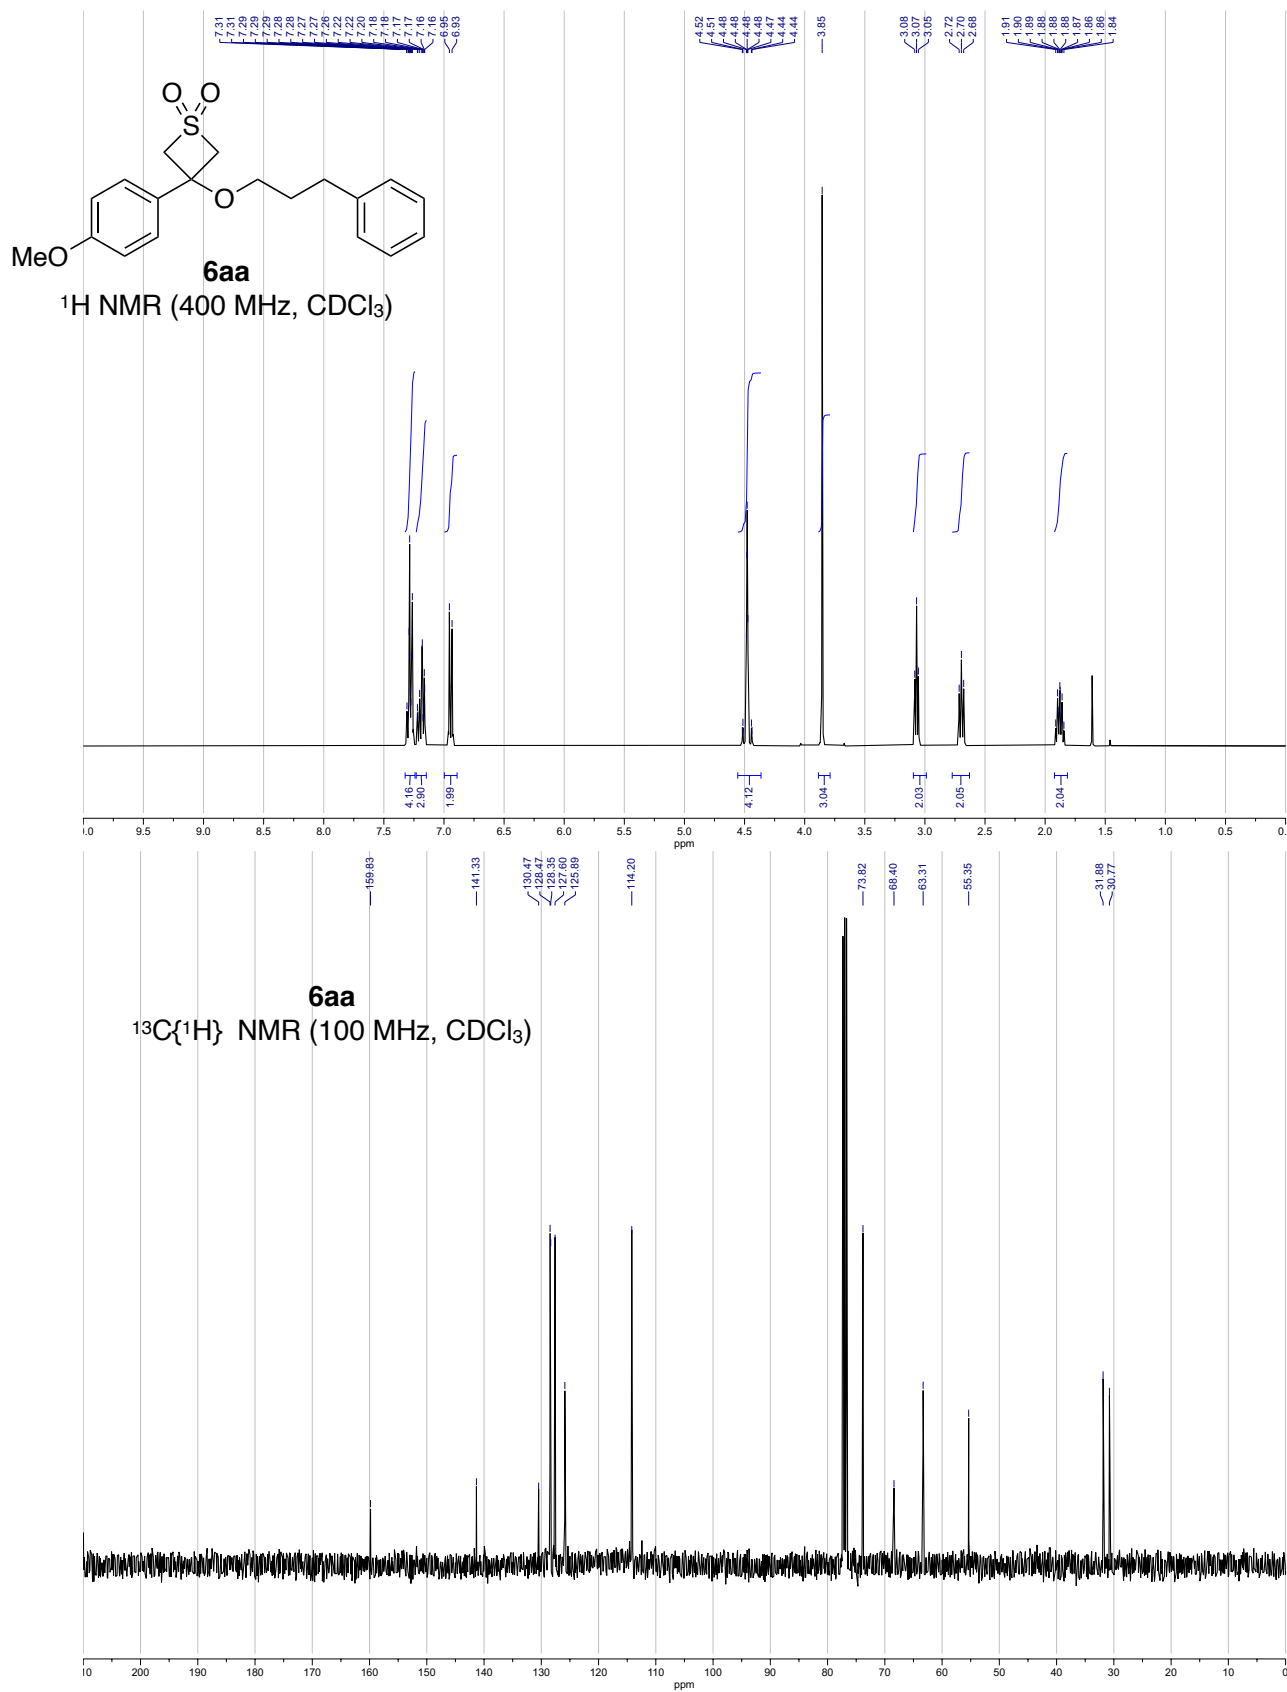

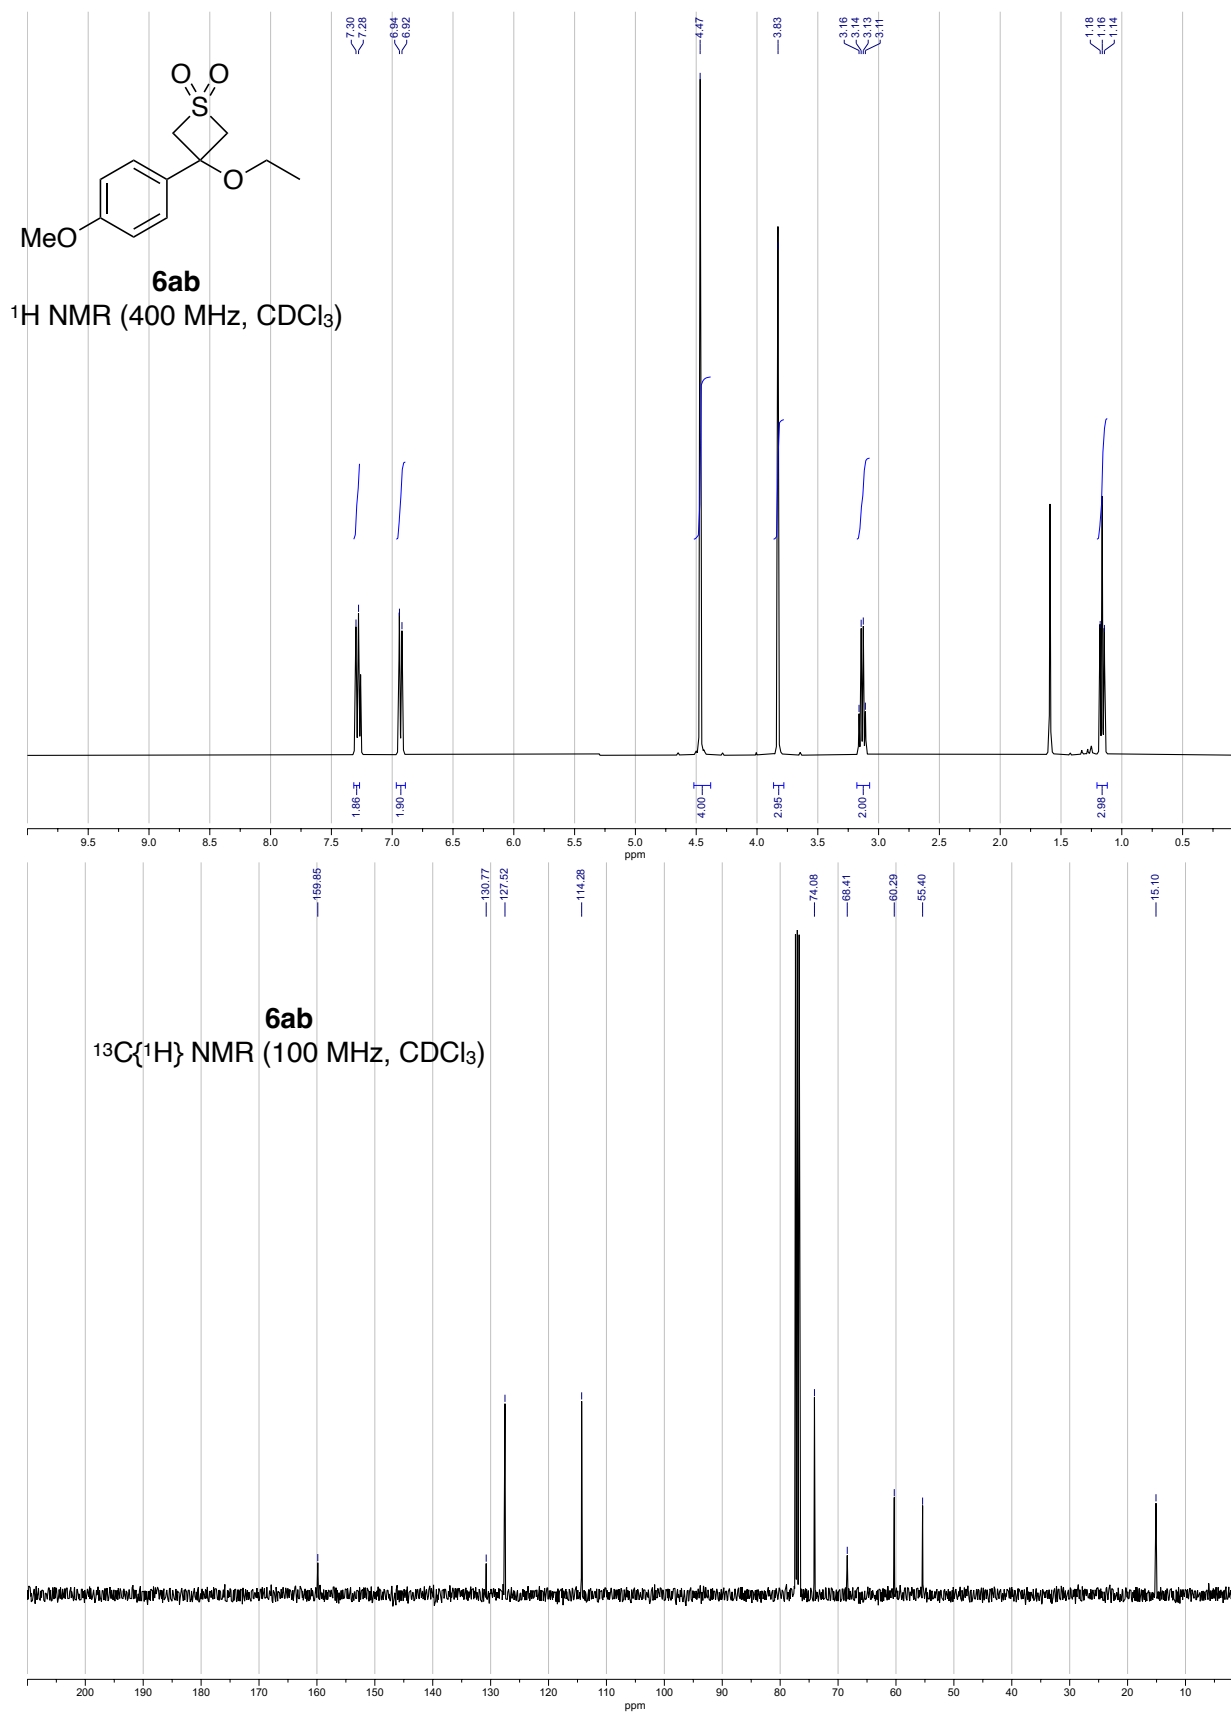

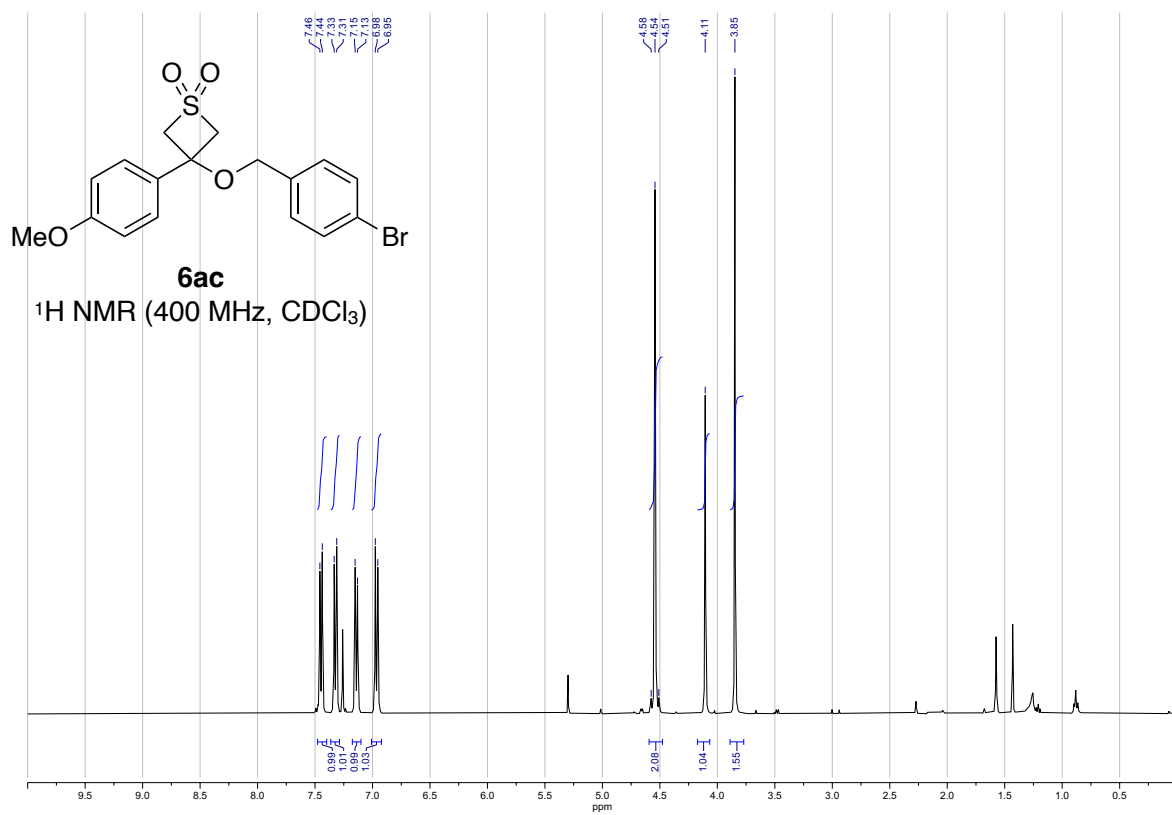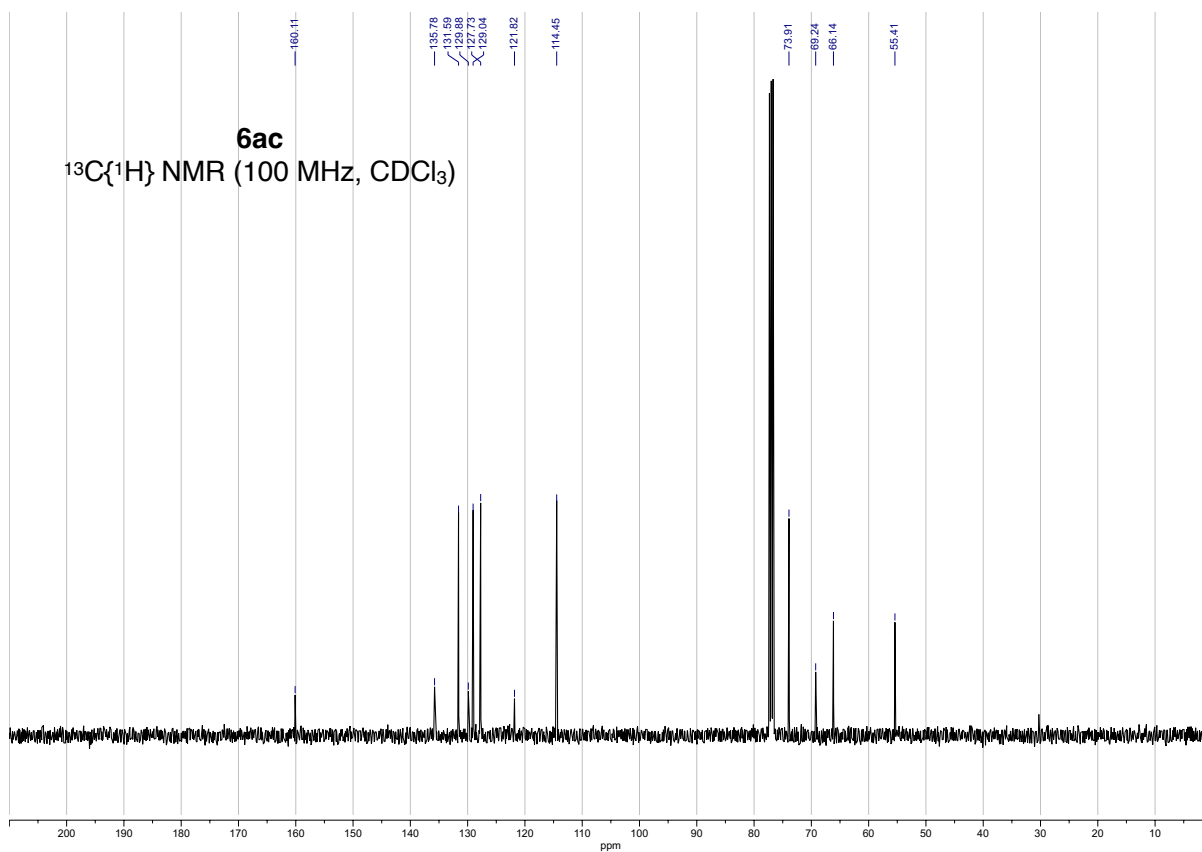



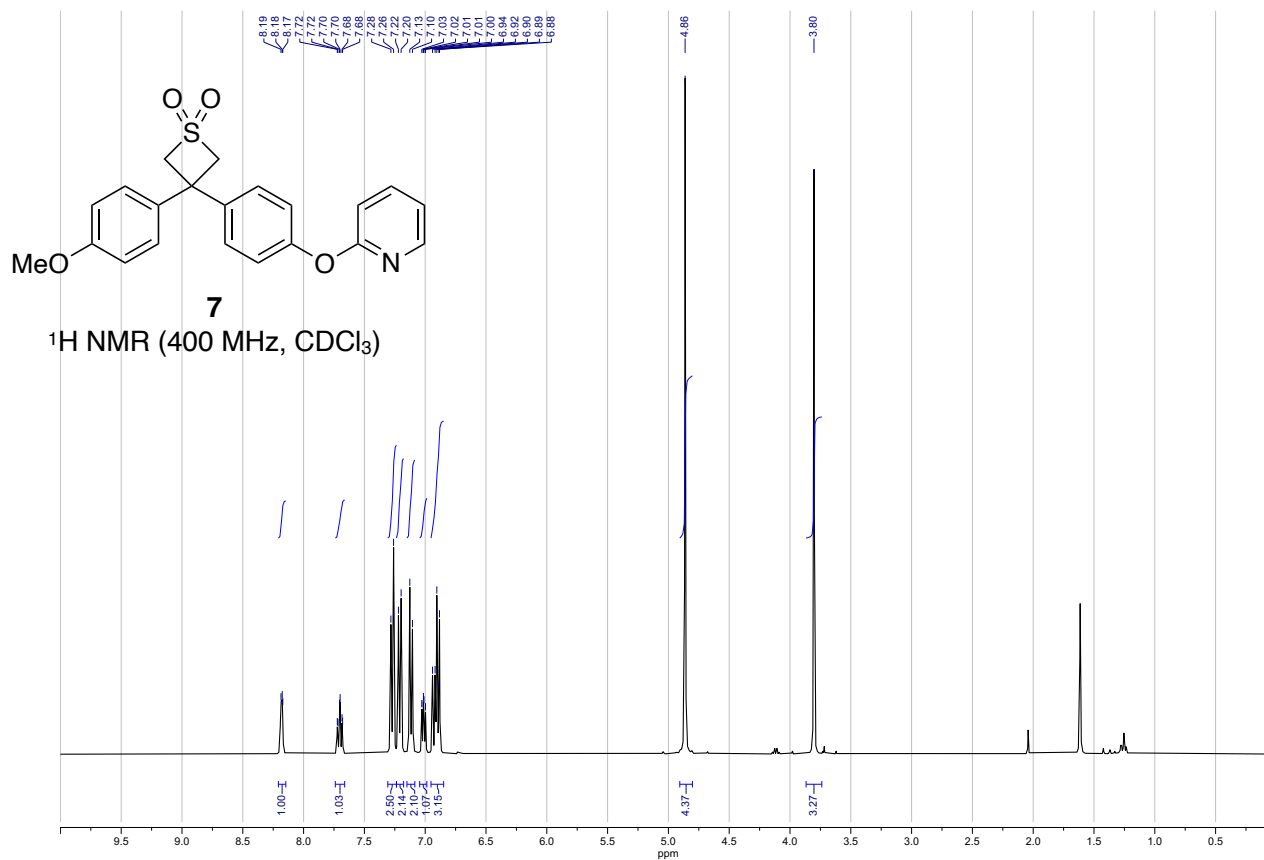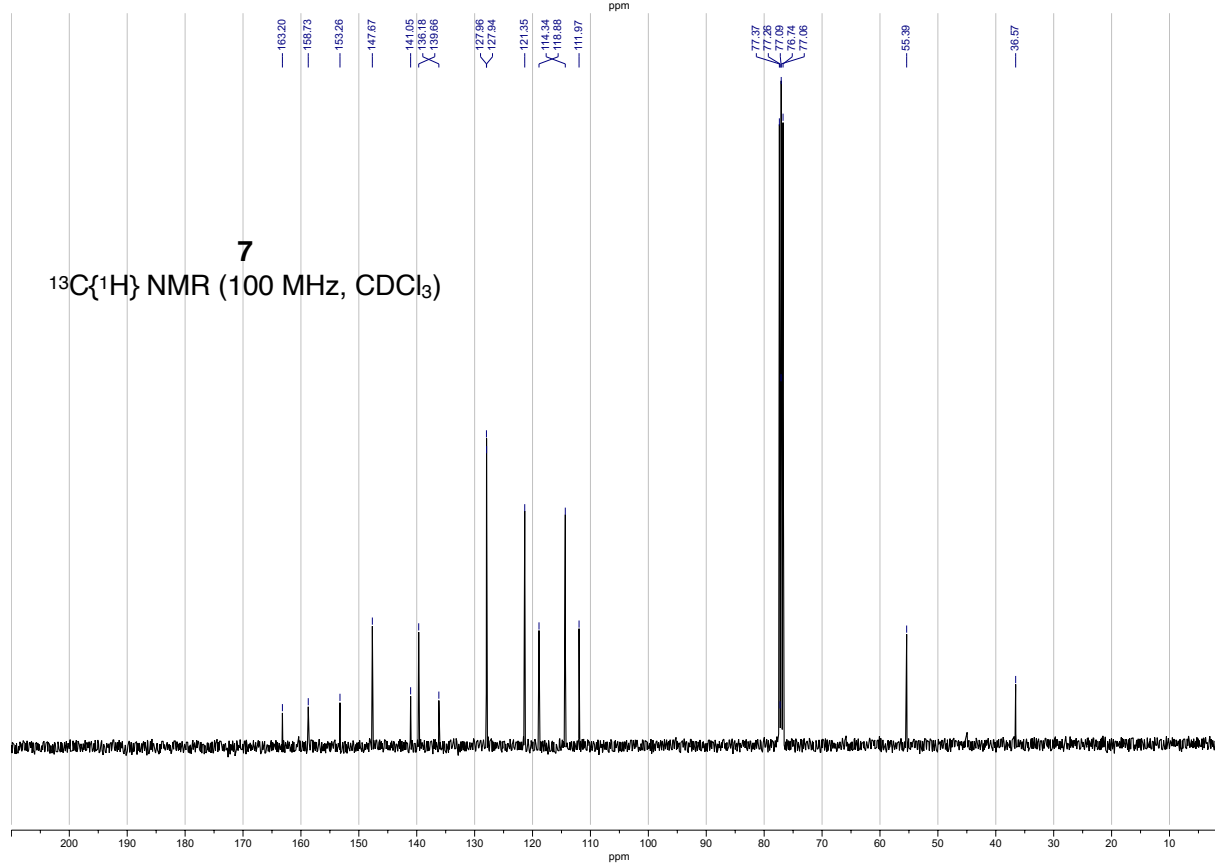

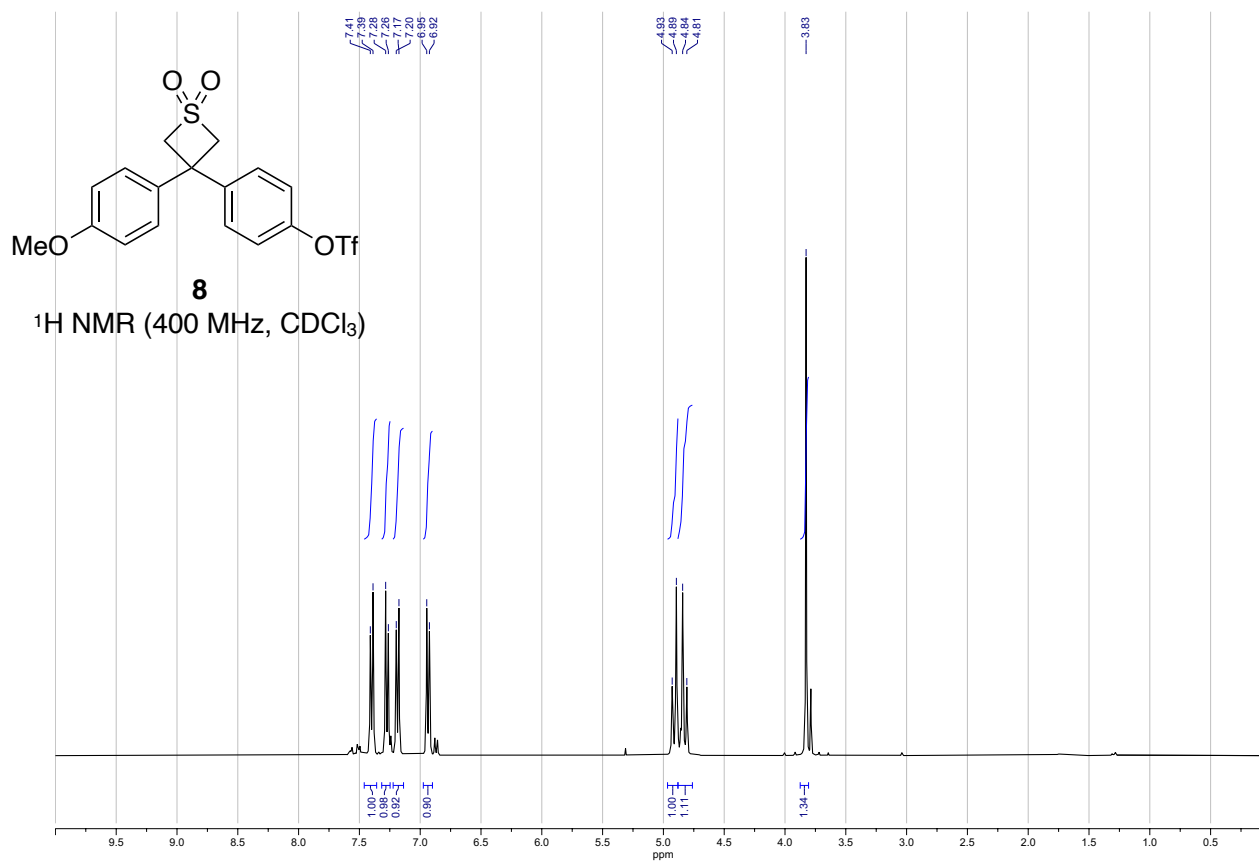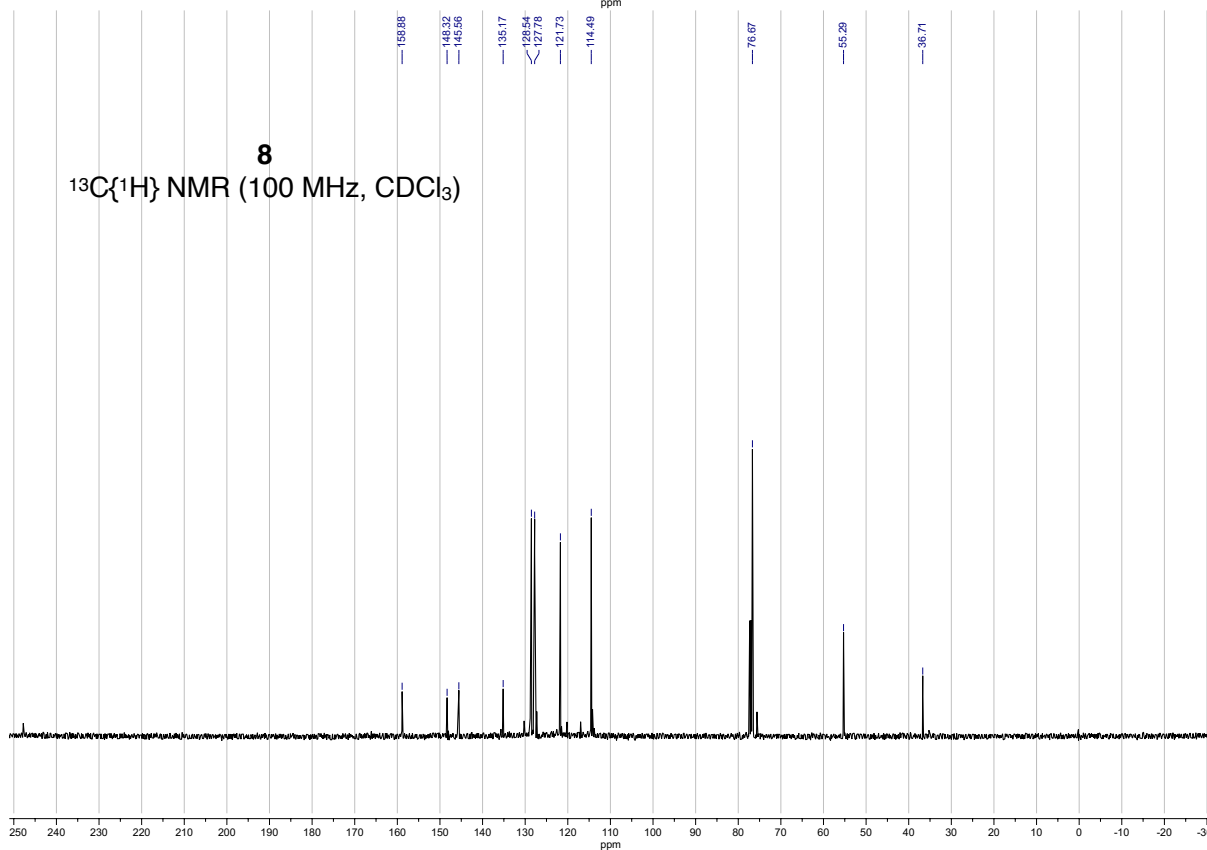

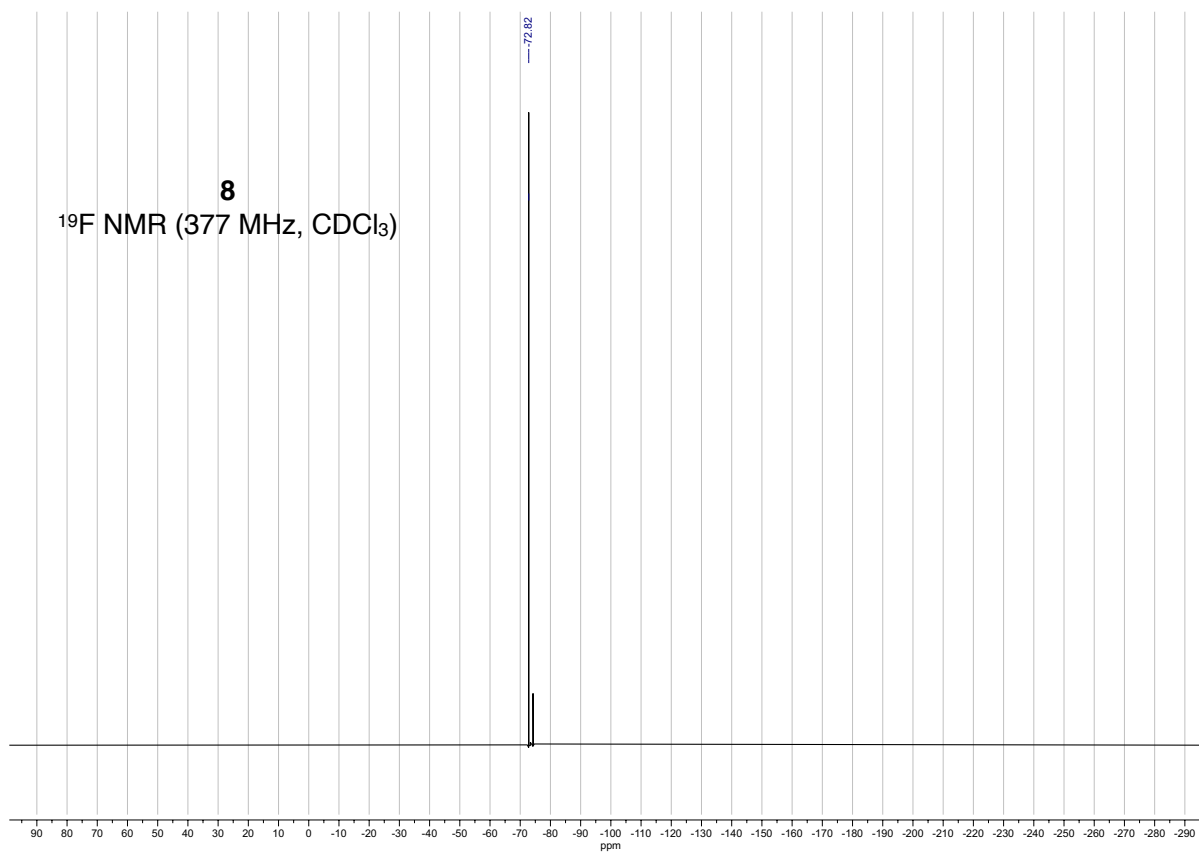

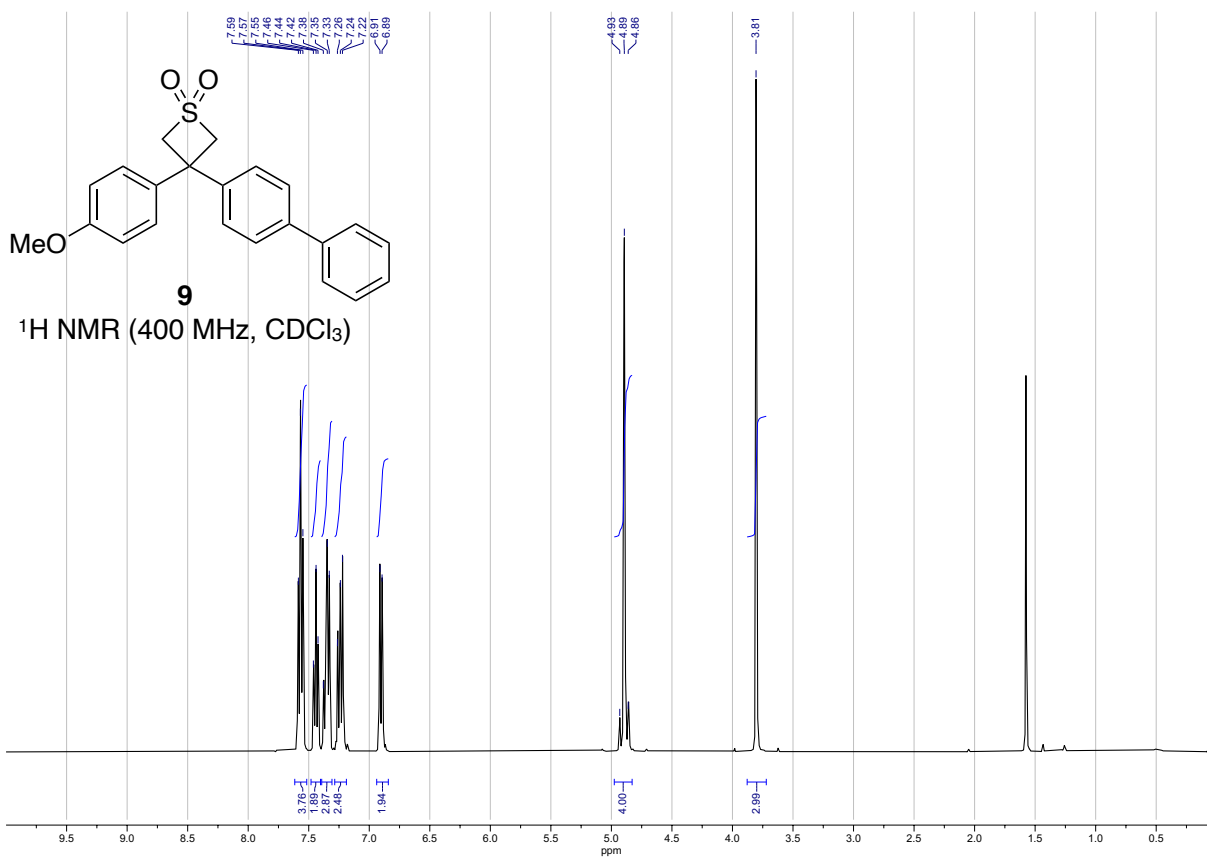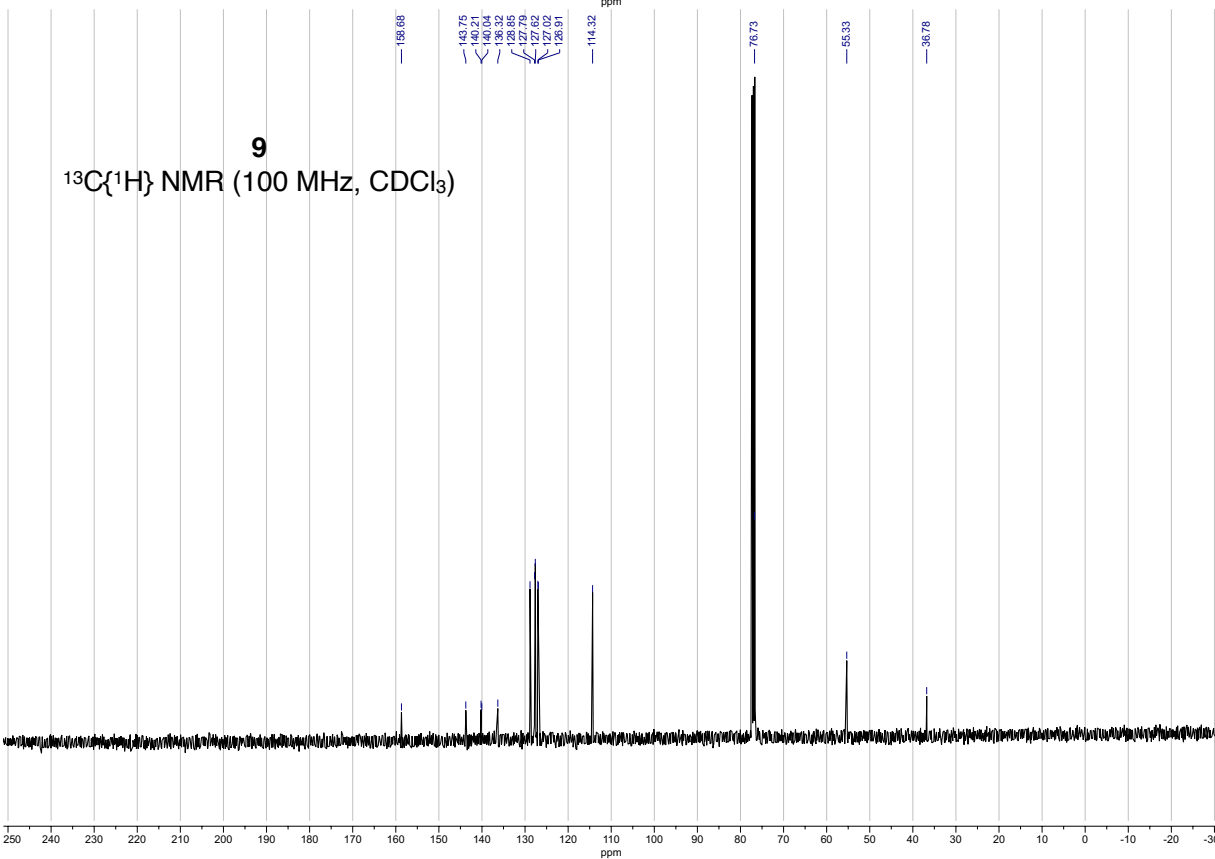

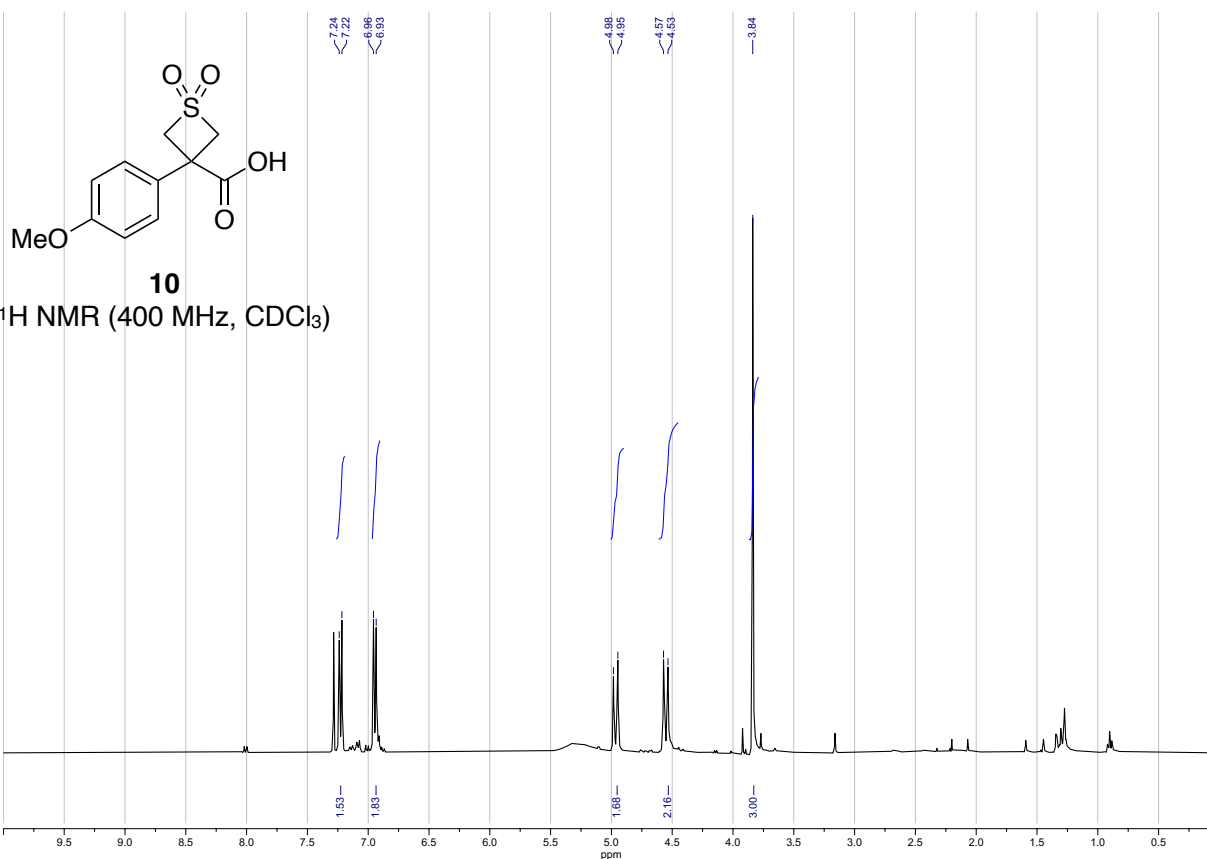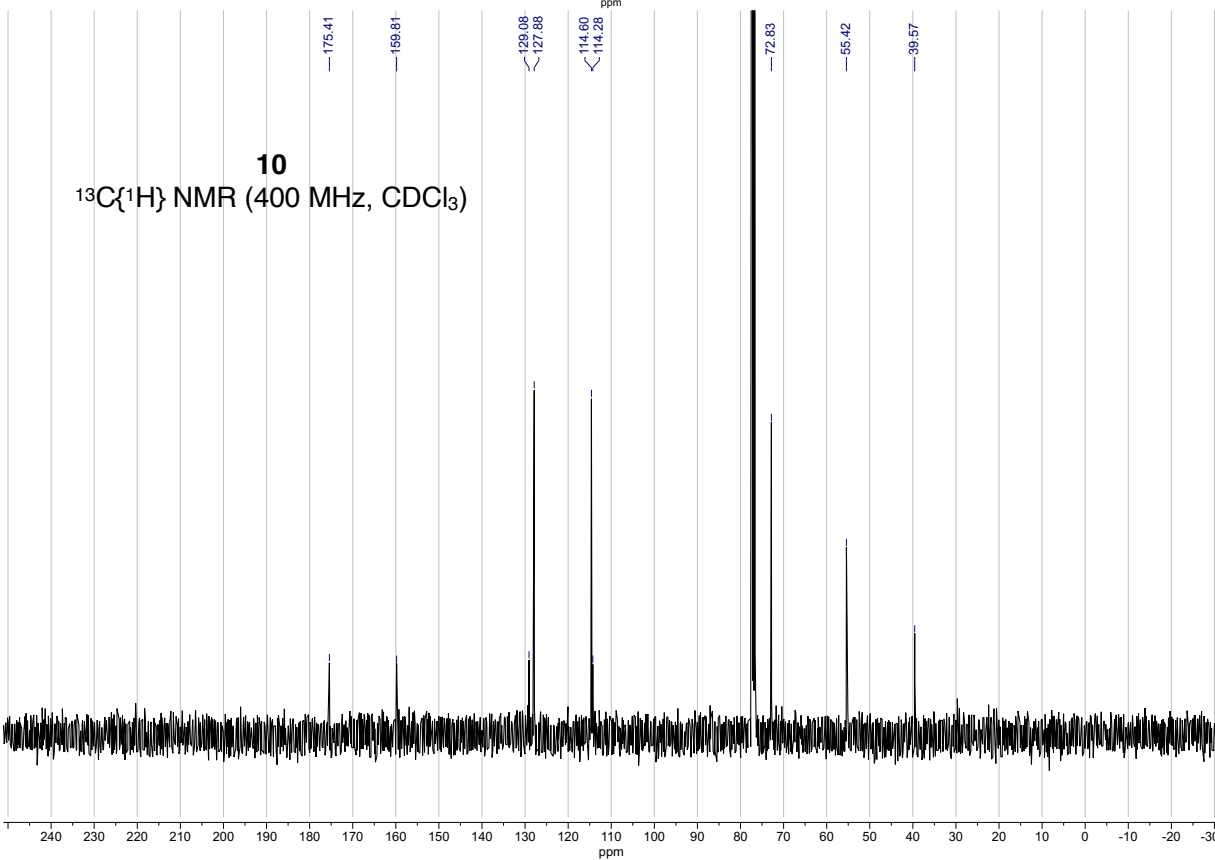

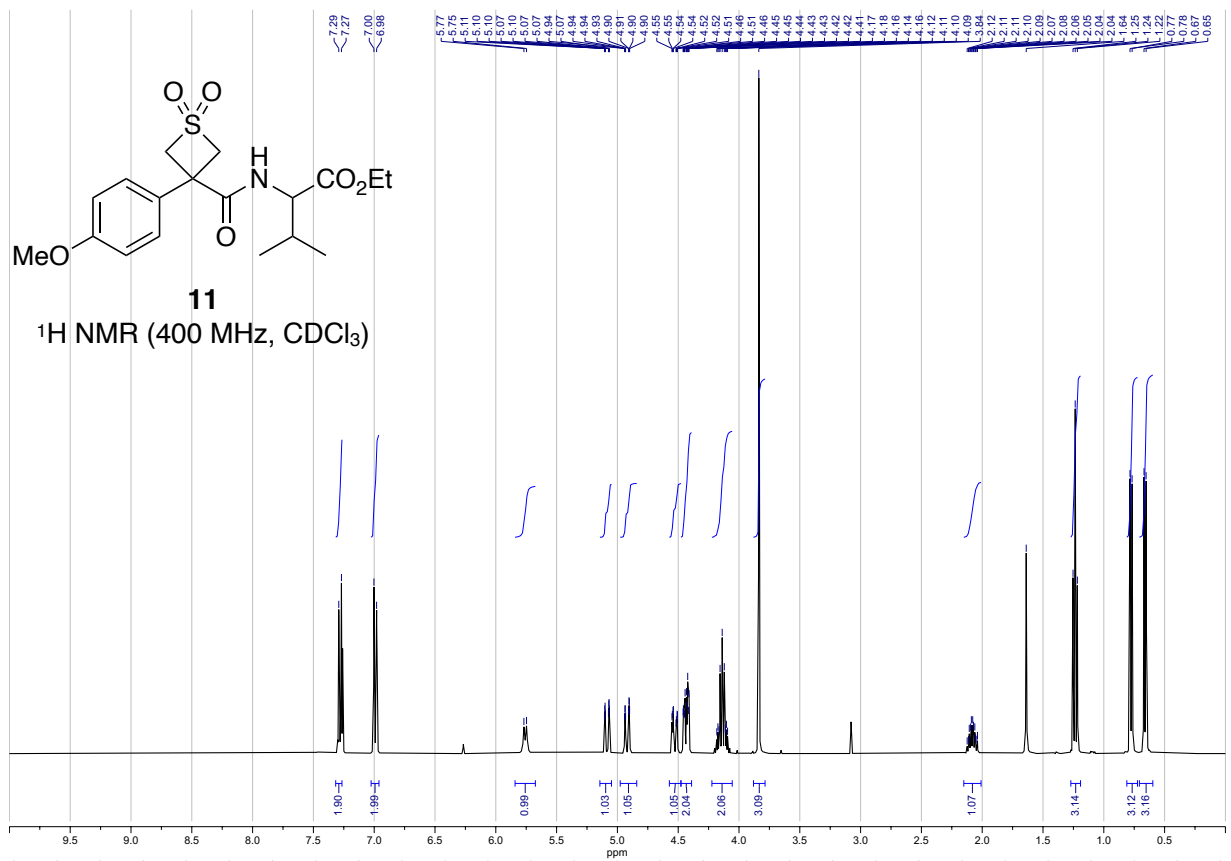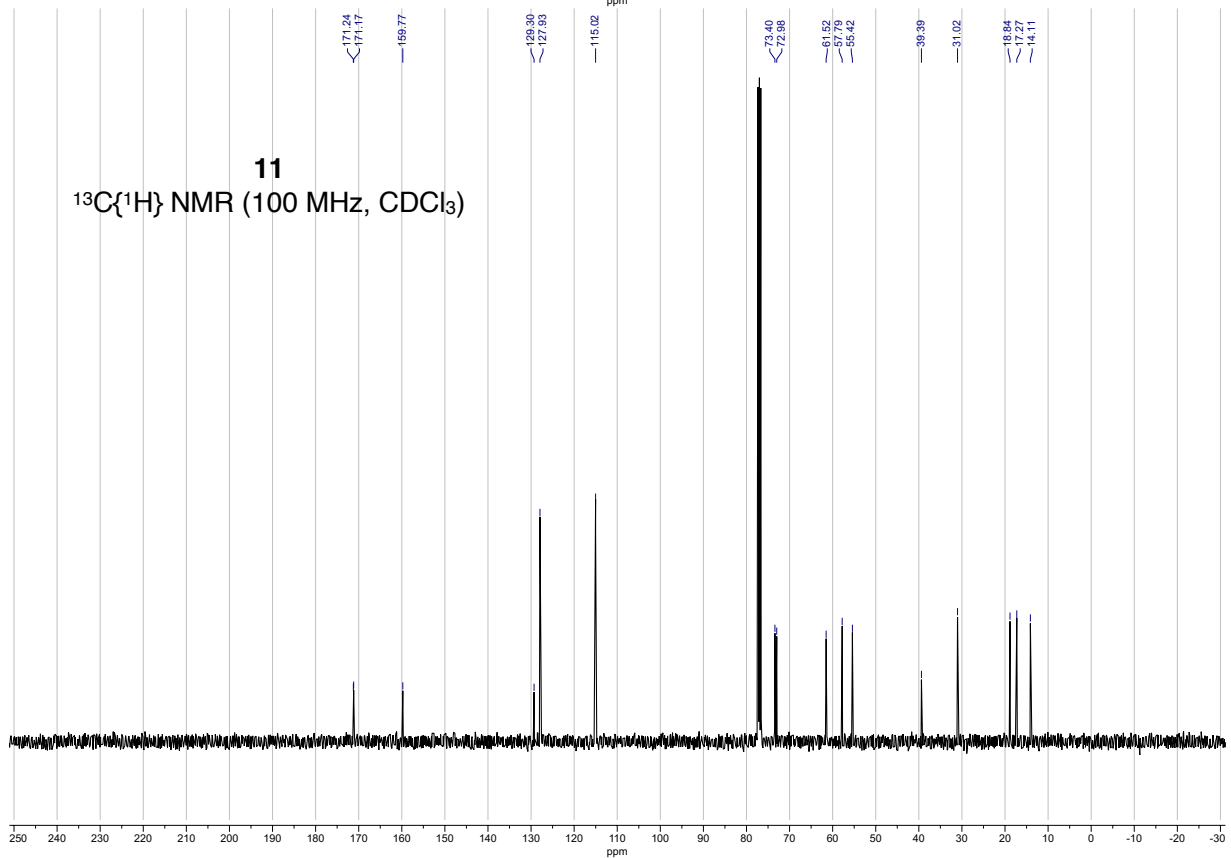

## References

- (1) Dolomanov, O. V.; Bourhis, L. J.; Howard, J. A. K; Puschmann, H. OLEX2:a Complete Structure Solution, Refinement and Analysis Program. *J. Appl. Cryst.* **2009**, *42*, 339–341.
- (2) SHELXTL v5.1, Bruker AXS, Madison, WI, **1998**.
- (3) SHELX-2013, G.M. Sheldrick, *Acta Cryst.*, **2015**, *C71*, 3–8.
